1 **Plastome-based Phylogenomic analyses provide insights into the germplasm**  
2 **resource diversity of *Cibotium* in China**

3 **Ri-Hong Jiang<sup>1†</sup>, Si-Qi Liang<sup>2,3,4†</sup>, Fei Wu<sup>3,5,6</sup>, Li-Ming Tang<sup>7</sup>, Bo Qin<sup>1</sup>, Ying-**  
4 **Ying Chen<sup>1</sup>, Yao-Heng Huang<sup>1</sup>, Kai-Xiang Li<sup>1\*</sup>, Xian-Chun Zhang<sup>2,3\*</sup>**

5 <sup>1</sup> Guangxi Key Laboratory of Special Non-wood Forest Cultivation and Utilization,  
6 Guangxi Engineering and Technology Research Center for Woody Spices, Guangxi  
7 Forestry Research Institute, Nanning, China

8 <sup>2</sup> State Key Laboratory of Systematic and Evolutionary Botany, Institute of Botany,  
9 The Chinese Academy of Sciences, Beijing, China

10 <sup>3</sup> China National Botanical Garden, Beijing, China

11 <sup>4</sup> College of Life Sciences, University of Chinese Academy of Sciences, Beijing,  
12 China

13 <sup>5</sup> Beijing Botanical Garden, Beijing, China

14 <sup>6</sup> Beijing Floriculture Engineering Technology Research Centre, Beijing, China

15 <sup>7</sup> Guangxi Forestry Industry Group Stock Corporation, Nanning, China

16 †These authors have contributed equally to this work

17 \*Correspondence:

18 Xian-Chun Zhang

19 zhangxc@ibcas.ac.cn

20 Kai-Xiang Li

21 lkx202@126.com

22

23 **Keywords:** chloroplast genome; *Cibotium barometz*; *Cibotium sino-burmaense*;  
24 conservation; DNA barcoding; endangered species; germplasm resource; species  
25 diversity

26

27 **Abstract**

28 Germplasm resource is the source of herbal medicine production. Cultivation of  
29 superior germplasm resources helps to resolve the serious conflict between long-term  
30 population persistence and growing market demand by producing materials with high

31 quality consistently. *Cibotium barometz* is the original plant of cibotii rhizoma  
32 (“Gouji”), a traditional Chinese medicine used in the therapy of pain, weakness, and  
33 numbness of lower extremity. Long-history use of *Cibotium* has rendered wild  
34 populations of this species declined seriously in China. Without sufficient  
35 understanding of species and lineage diversity of *Cibotium*, it is difficult to propose a  
36 targeted conservation scheme at present, let alone selecting high-quality germplasm  
37 resources. In order to fill such a knowledge gap, this study sampled *C. barometz* and  
38 relative species throughout their distribution in China, performed genome skimming  
39 to obtain plastome data, and conducted phylogenomic analyses. We constructed a  
40 well-supported plastome phylogeny of Chinese *Cibotium*, which showed that three  
41 species with significant genetic difference distributed in China, namely *C. barometz*,  
42 *C. cumingii*, and *C. sino-burmaense*, a cryptic species endemic to NW Yunnan and  
43 adjacent region of NE Myanmar. Moreover, our results revealed two differentiated  
44 lineages of *C. barometz* distributed in the east and west side of a classic  
45 phylogeographic boundary that probably shaped by monsoons and landforms in  
46 China. We also evaluated the resolution of nine traditional barcode loci, and designed  
47 five new DNA barcodes based on the plastome data which can discriminate all these  
48 species and lineages of Chinese *Cibotium* accurately. These novel findings integrated  
49 genetic basis will guide conservation planners and medicinal plant breeders to build  
50 systematic conservation plans and exploit germplasm resources of *Cibotium* in China.

## 51 INTRODUCTION

52 Traditional Chinese medicine plays an indispensable role in the treatment of multiple  
53 diseases in China and other developing countries (Newman et al., 2008). Apart from  
54 the traditional usage, many medicinal plants, such as *Artemisia annua* L. (artemisinin,  
55 Tu, 2016), *Huperzia javanica* (Sw.) C. Y. Yang (Huperzine A, Zangara, 2003; it  
56 worthy to note that in many studies the plant was named as *Huperzia serrata* (Thunb.)  
57 Trevis., a native species only found in NE Asia which do not produce Huperziane A,  
58 Chen et al., 2021), and *Panax notoginseng* (Burk.) F. H. Chen (Notoginseng  
59 triterpenes, Huang et al., 2021), have also been found as the source of modern  
60 pharmaceuticals and generated increasing attention. Although China harbors abundant  
61 medicinal plant diversity, original species of many commonly used herbal medicines  
62 are facing the risk of population decline and even extinction under a growing demand  
63 (Chen et al., 2016). Germplasm resource is the core of medicine production (Ma and  
64 Xiao, 1998; Huang et al., 2008; Zhang and Jiang, 2021; Meng et al., 2023).

65 Cultivation of specific high-quality germplasm resources will not only resolve present  
66 conflict between conservation and exploitation, but also ensure a steady production of  
67 high-quality medicine (Ma and Xiao, 1998; Chen et al., 2016). Therefore, clarifying  
68 genetic background and diversity is the basic and crucial step of achieving sustainable  
69 utilization of medicinal plants, and also provides implications for the collection,  
70 identification, evaluation and conservation of germplasm resources (Schoen and  
71 Brown, 1993; Ma and Xiao, 1998; Yu et al., 2013; Khoury et al., 2022).

72 *Cibotium barometz* (L.) J. Sm. is the original species of traditional medicine  
73 *cibotii* rhizoma (“Gouji” in Chinese), the processed rhizome of which can be used in  
74 the therapy of pain, weakness, and numbness of lower extremity (Chinese  
75 Pharmacopoeia Commission, 2020; Figure 1A). Phytochemical researches have  
76 showed that the extract of its rhizomes is rich in active compounds such as pterosins,  
77 terpenes, steroids, flavonoids, glucosides, phenolic acids, and pyrones (Xu et al.,  
78 2012). Bioactivity experiments support its effect including the treatment of  
79 osteoporosis and osteoarthritis, antioxidant and antimicrobial activities, as well as  
80 abirritation (Ju et al., 2005; Cuong et al., 2009; Zhao et al., 2011; Li et al., 2014; Fu et

81 al, 2017; Heng et al, 2020; Sun, 2021). Pot cultures and crafts of this species are also  
82 popular on the market because of its elegant evergreen large fronds and stump-like  
83 rhizomes covered with long, soft, golden hairs resembling gold-hair dogs (Figure 1B-  
84 D). Medicinal and ornamental values have resulted in destructive plunder of abundant  
85 natural resources of *C. barometz* in China. Investigation has shown that uncontrolled  
86 collection and habitat deconstruction are major threats of its population survival  
87 (Zhang et al., 2002).

88 *Cibotium barometz* is on the appendix II of CITES (Zhang et al., 2002;  
89 <https://cites.org/eng/app/appendices.php>). In the List of National Key Protected Wild  
90 Plants of China (State Forestry and Grassland Administration and the Ministry of  
91 Agriculture and Rural Affairs, P. R. China, 2021), the whole genus (with only two  
92 species known to China) is listed in Grade II Category. Although Chinese government  
93 has attached great importance to this genus, researchers are incapable of specifying  
94 which species or populations are key units awaiting conservation grounded in present  
95 knowledge. Such a phenomenon could lead to the waste of protective efforts and  
96 affect the maximization of medical value. Previous studies have showed that the  
97 genus *Cibotium* (Cibotiaceae, a member of the tree fern clade) comprises ca. 9-12  
98 species distributed in tropical and subtropical regions of Asia, Central America and  
99 the Hawaiian Islands (Holttum, 1963; Palmer, 1994; Korall et al., 2006; Smith et al.,  
100 2006; Geiger et al., 2013), three Asian members of which form a monophyletic clade  
101 (Geiger et al., 2013). Two species, *A. barometz* and *A. cumingii* Kunze, are recognized  
102 from China (Zhang and Nishida, 2013), the former is widespread in southern China,  
103 northeastern India and extends to Malaysia, while the latter is only known from the  
104 Philippines, Ryukyu Islands, as well as Taiwan island of China (Holttum, 1963;  
105 Zhang and Nishida, 2013). However, the geographical pattern of genetic diversity and  
106 differentiation of *C. barometz* has not been explored throughout its wide distribution,  
107 let alone talking about the variation of medicinal values among different regions  
108 accurately.

109 In previous studies, several chloroplast DNA (cpDNA) fragments have been  
110 applied to phylogeny of the tree fern clade including *Cibotium* (Korall et al., 2006;

111 Geiger et al., 2013). However, informative variation sites provided by these loci are  
112 too insufficient to illuminate the relationship within Chinese *Cibotium*. With the rapid  
113 development of next-generation sequencing (NGS) technologies, as well as  
114 advantages including low requirement of material quality, low costs and rich variable  
115 sites, chloroplast genome (plastome) has been used for phylogenetic reconstruction at  
116 different levels as well as species delimitation of closely related species in different  
117 plant lineages (e.g., Hammer et al., 2019; Wei and Zhang, 2020; Ji et al., 2021; Du et  
118 al., 2022; Xi et al., 2022; Zhang et al., 2022; Yang et al., 2023). Furthermore,  
119 plastomes can not only be applied to develop traditional DNA barcode but also used  
120 as a single genetic marker namely “ultra-barcode” (Nock et al., 2011; Kress et al.,  
121 2015; Hollingsworth et al., 2016), which largely benefits the identification of species  
122 or tissues lack of phenotypic divergence including products of medical plants (Park et  
123 al., 2021; Qin et al., 2022; Wang et al., 2022; Wei et al., 2022). In this study, we  
124 performed genome skimming and assembled the complete plastome of representative  
125 samples of *C. barometz* and relatives throughout the distribution range in China and  
126 adjacent areas. We aimed to 1) compare structure and composition variation on  
127 plastome among Chinese *Cibotium* species; 2) propose a phylogeny-based species  
128 delimitation; 3) investigate the geographical pattern of variation and diversity based  
129 on plastome data; and 4) suggest candidate barcodes for specific species and lineage  
130 identification of Chinese *Cibotium*.

## 131 **MATERIALS AND METHODS**

### 132 **Taxon sampling, DNA extraction and Illumina sequencing**

133 Frond tissues of 25 *Cibotium* individuals were collected for genome skimming  
134 throughout the distribution range of China and adjacent regions (Table 1, Figure 2).  
135 Most accessions were fresh fronds dried with silica-gel and preserved at 4°C except  
136 five samples obtained from specimens deposited in the herbarium PE (Table 1). Based  
137 on the presence or lack of basal pinnules on basiscopic side of pinnae on voucher  
138 specimens (Figure 1I-J, Zhang and Nishida, 2013), samples were sorted into *C.*  
139 *barometz* or *C. cumingii* preliminarily.

140 All the tissue samples were sequenced at the Novogene Corporation (Beijing,

141 China). Total genomic DNA was extracted with a modified CTAB procedure (Doyle  
142 and Doyle, 1987). Libraries with an insert size of 350 bp were constructed using a  
143 TruSeq Nano DNA HT Sample Preparation Kit (Illumina, San Diego, California,  
144 U.S.A.) following manufacturer's recommendations. Paired-end reads (PE150) were  
145 then sequenced on an Illumina NovaSeq 6000 platform. After quality control of raw  
146 reads using ng\_QC v.2.0 developed by Novogene Corporation with the default  
147 settings, we obtained ca. 2 to 4 Gb clean reads for each sample.

#### 148 **Assembly and Annotation**

149 We *de novo* assembled plastomes of all our samples with clean reads using the  
150 GetOrganelle toolkit (Jin et al., 2020) with recommended parameters. The complete  
151 plastome of *C. barometz* (NC\_037893, Liu et al., 2018) downloaded from GenBank  
152 database was used as a reference during assembly and annotation. Assembly errors were  
153 identified in the initial assembly contigs and manually corrected by the mapping of raw  
154 reads to assembled sequences with Geneious v.11.1.4 (Kearse et al., 2012). Boundaries  
155 of large single-copy (LSC), small single-copy (SSC) and two inverse repeat regions  
156 (IRs) were detected using RepeatFinder v.1.0.1 (Volfovsky et al., 2001). Genome  
157 annotation was performed with GeSeq (Tillich et al., 2017) and Geneious v.11.1.4  
158 (Kearse et al., 2012). Protein-coding sequences were checked against the National  
159 Center for Biotechnology Information (NCBI) database and manually corrected. tRNAs  
160 were confirmed with tRNAscan-SE v2.0.3 (Lowe and Chan, 2016). Final circular map  
161 of plastome were visualized with OGDRAW v.1.3.1 (Greiner et al., 2019). We also used  
162 program LAGAN (Brudno et al., 2003) in mVISTA to compare the gene order and  
163 structure among different species with the plastome sequence alignment generated by  
164 MAFFT v.7.313 (Katoh and Standley, 2013).

#### 165 **Phylogenetic analyses**

166 The whole length plastome sequences of all *Cibotium* samples and the reference  
167 (NC\_037893) as well as three outgroup species, i.e. *Alsophila spinulosa*  
168 (NC\_012818), *Sphaeropteris brunoniana* (NC\_051561) and *Plagiogyris euphlebia*  
169 (NC\_046784), were aligned with MAFFT v.7.313 (Katoh and Standley, 2013) after  
170 the removal of one IR region. The alignment was then filtered using GBLOCKS v.

171 0.91b (Castresana, 2000) to remove ambiguously aligned regions. We also extracted  
172 protein-coding genes of each plastome with a python script  
173 ([https://github.com/Kinggerm/PersonalUtilities/blob/master/get\\_annotated\\_regions\\_fr](https://github.com/Kinggerm/PersonalUtilities/blob/master/get_annotated_regions_from_gb.py)  
174 [om\\_gb.py](https://github.com/Kinggerm/PersonalUtilities/blob/master/get_annotated_regions_from_gb.py)) and concatenated all these single gene alignments to build a protein-  
175 coding gene dataset for phylogenetic analyses. The best-fitting nucleotide substitution  
176 model of each alignment was determined based on Bayesian information criterion  
177 (BIC) by ModelFinder (Kalyaanamoorthy et al., 2017). Maximum likelihood (ML)  
178 analysis was performed with both datasets using IQ-TREE v.1.6.8 (Nguyen et al.,  
179 2015), with 10,000 ultrafast bootstrap replicates (Minh et al., 2013). Bayesian  
180 inference (BI) analysis was performed with the protein-coding gene dataset using  
181 MrBayes v.3.2.6 (Ronquist et al., 2012). One cold and three hot chains were run for  
182 2,000,000 generations with sampling taken every 1,000 generations and a burn-in of  
183 25%. The convergence of Markov chain Monte Carlo runs was checked with Tracer  
184 v.1.7.1 (Rambaut et al., 2018) to ensure that the effective sampling size (ESS) of all  
185 parameters were above 200. Phylogenetic trees were all visualized, rooted with *P.*  
186 *euphlebia* and edited in FigTree v.1.4.2 (Rambaut, 2014).

### 187 **Genetic diversity and divergence evaluation**

188 With the whole length plastome sequence alignment including all 26 ingroup samples,  
189 we evaluated genetic diversity of each species and lineage (east and west lineage of *C.*  
190 *barometz*) by calculating nucleotide diversity ( $\pi$ ) using DnaSP v.6.12.03 (Rozas et al.,  
191 2017). We also analyzed the number of fixed site differences and the average number  
192 of nucleotide substitutions per site (Dxy) between pairwise-species or lineages to show  
193 their divergence level.

### 194 **Candidate Barcoding Regions Detection and Verification**

195 To identify candidate regions for species and even lineage discrimination in Chinese  
196 *Cibotium* plants, we first used DnaSP v.6.12.03 (Rozas et al., 2017) to evaluate  $\pi$  of the  
197 plastome sequence alignment of *C. barometz* with a window length of 800 bp and a step  
198 size of 200 bp. Nucleotide polymorphism sites fixed in specific species and lineage  
199 were also identified by checking the alignment including all *Cibotium* samples.  
200 Additionally, the feasibility and convenience of PCR amplification in practice was also



201 taken into consideration, therefore, the chosen barcode regions are all shorter than 800  
202 bp in length and have conservative flanks suitable for primers to combine with.  
203 Candidate loci meeting all these requirements were finally selected, PCR primers of  
204 which were designed with Primer3 v.2.3.7 (Koressaar & Remm, 2007; Untergasser &  
205 al., 2012).

206 We extracted sequences of newly selected loci and nine cpDNA markers (*atpA*,  
207 *atpB*, *rbcL*, *rps4*, *rbcL-accD*, *rbcL-atpB*, *trnG-trnR*, *trnL-trnF* and *rps4-trnS*) applied  
208 in previous studies (Korall et al., 2006; Geiger et al., 2013) from all our samples,  
209 included other accessible data of *C. barometz* and *C. cumingii* on GenBank, and aligned  
210 them. We counted the number of variable sites with MEGA v.10.1.6 (Kumar et al., 2018)  
211 and performed ML analysis on each alignment including outgroups following the same  
212 procedure as mentioned above. We compared topologies of resulted phylogenetic trees  
213 to the one built with plastome dataset to evaluate the efficiency of these loci in species  
214 and lineage discrimination. Multiple individuals of a specific taxon resolved as  
215 monophyletic with bootstrap support over 50% were treated as successfully  
216 discriminated.

## 217 **RESULTS**

### 218 **Plastome Characteristics of *Cibotium***

219 Complete chloroplast genomes of 25 sampled individuals of *Cibotium* were obtained  
220 and assembled into circular molecules comprising one LSC, one SSC and two IRs  
221 (Figure 3, Table 1), which are all typical quadripartite structures. Complete plastomes  
222 of *C. cumingii* and the majority of *C. barometz* ranged from 165,077 to 166,443 bp in  
223 length with very similar GC contents ca. 41.7%, except five “*C. barometz*” samples  
224 probably of an unknown species collected from NW Yunnan and NE Myanmar with  
225 significantly shorter length (162,108–162,206 bp) and lower GC content (41.4 %).

226 The length of LSC (85,634–85,781 bp) and SSC (22,017–22,067 bp) are rather stable  
227 among all accessions, whereas IR size varied among samples of *C. cumingii* (28,681–  
228 28,759 bp), most *C. barometz* (28,944–29,349 bp) and those Yunnan-Myanmar  
229 samples (27,206–27,248 bp) with clearly discrete distribution. The boundaries of IR  
230 are exactly the same among all samples without any expansion or contraction. In



231 comparison, the intergeneric regions between *rrn16* and *rps12* varied seriously among  
232 species (Figure 4), which mainly contributed to the IR size variation.

233 All the plastomes encoded a total of 117 unique genes in identical order,  
234 including 85 protein-coding genes, 28 tRNA genes, four rRNA genes (Table 2, Figure  
235 3), which is generally in consistent with the reference (Liu et al., 2018). In most  
236 samples of *C. barometz*, the annotated *matK* gene region could not be translated into  
237 protein successfully (pseudogenization) because of an early termination resulted from  
238 the missing of 1 or 2 nucleotides (Table 1). The gene *ycf2*, which was predicted as  
239 pseudogene (6,250 bp) due to a code shift mutation in the reference plastome of *C.*  
240 *barometz* (NC\_037893, Liu et al., 2018), is found to be normal (6,249 bp) in all the  
241 samples of this study. All four rRNA genes, five tRNA genes (*trnA-UGC*, *trnH-GUG*,  
242 *trnI-GAU*, *trnN-GUU*, *trnR-ACG*), and three protein coding genes (*rps7*, *psbA*, *ycf2*)  
243 are totally duplicated, whereas *ndhB* and *rps12* have one incomplete duplication  
244 merely.

#### 245 **Phylogenomic relationship within *Cibotium***

246 Alignments of whole length plastome and protein-coding genes were 136,298 bp and  
247 73,080 bp, respectively. All three phylogenetic trees (Figures 5, S1) built with  
248 different datasets and methods showed generally similar topology and strongly  
249 supported the monophyly of *C. cumingii*, most *C. barometz*, as well as the five  
250 samples from NW Yunnan and NE Myanmar Yunnan-Myanmar. The five Yunnan-  
251 Myanmar samples formed one monophyletic clade (Clade A, Figure 5), which is sister  
252 to all the other accessions. The remaining samples of *C. barometz* except the one  
253 collected in Hainan island could be further divided into two lineages, i.e. Subclade E  
254 including samples from SE China (Zhejiang, Jiangxi, Fujian, Guangdong, Guizhou)  
255 and the Ryukyu Islands, and Subclade W including samples from SW China  
256 (Chongqing, Guangxi, Yunnan, Xizang). The Hainan sample clustered within  
257 Subclade E based on the protein-coding gene dataset with low support value (Figure  
258 5), but formed a single clade sister to the combination of Subclade E and Subclade W  
259 (MLBS = 26) based on the whole length dataset (Figure S1). Therefore, both results  
260 failed to strongly resolve the topology among the southeastern and southwestern

261 Subclades as well as the Hainan sample within *C. barometz*.

## 262 **Genetic diversity and divergence of *Cibotium* species**

263 Including two, five, nineteen, ten, and eight individuals, the estimated values of  $\pi$  in  
264 *C. cumingii*, *Cibotium* from Yunnan-Myanmar, *C. barometz*, as well as east and west  
265 lineages of *C. barometz* are 0.00032, 0.00008, 0.00027, 0.00020, and 0.00013  
266 respectively. Among them, *C. cumingii* showed the richest genetic diversity though  
267 only two individuals were sampled, whereas the diversity is the lowest in the Yunnan-  
268 Myanmar *Cibotium* plants. Fixed difference numbers and Dxy values are as follows:  
269 *C. cumingii* & *C. barometz*, 183, 0.00175; *C. cumingii* & Yunnan-Myanmar *Cibotium*,  
270 207, 0.00176; *C. barometz* & Yunnan  
271 -Myanmar *Cibotium*, 80, 0.00085; Clade E & Clade W, 13, 0.00033. *C. cumingii*  
272 showed the greatest divergence level with two other species distributed in China.  
273 Interspecific variation of each species pair is significantly higher than lineages  
274 divergence within *C. barometz*.

## 275 **DNA Barcodes for *Cibotium* Species Discrimination**

276 Based on phylogenetic topologies (Figure S2 A-I), only four (*trnL-trnF*, *trnG-trnR*,  
277 *rps4-trnS*, and *rbcL-accD*) among the nine traditional cpDNA loci are effective in the  
278 identification of *C. cumingii*, while merely the former two of the four could further  
279 discriminate Yunnan-Myanmar *Cibotium* correctly. None of them correctly showed  
280 the intraspecies divergence within *C. barometz*.

281 The nucleotide variability of *C. barometz* plastome was shown in Figure 6.  
282 Variable regions distributed evenly along plastome with  $\pi$  value less than 0.002 except  
283 a highly variable region within IR between *rrn16* and *rps12*. Five fragments (Figure  
284 6) with moderate variation for species and lineage discrimination as well as suitable  
285 length and flanks for PCR amplification were chosen as candidate DNA barcode loci.  
286 Comparing with the nine old cpDNA loci, these new barcodes showed higher  
287 variability among the Chinese *Cibotium* species (Table 3), and were all capable to  
288 assign individuals of *C. cumingii*, Yunnan-Myanmar *Cibotium*, and two different  
289 lineages within *C. barometz* into respective clades correctly (Figure S2 J-N). The  
290 Hainan sample with uncertain phylogenetic position was clustered with samples of the

291 western lineage by *rps3-rps19* and *ndhA*, but clustered into the eastern lineage by  
292 *chlB-trnQ*, *petD-rpoA* and *psaC-ndhG*.

## 293 **DISCUSSION**

### 294 ***Cibotium* species from Yunnan-Myanmar**

295 Based on our plastome-based phylogenetic relationship, *C. cumingii* is the species  
296 diverged firstly with all the other taxa of Chinese *Cibotium*. The result further  
297 distinguished two well-supported sister clades from the remaining samples, one  
298 comprising samples distributed in S China and the Ryukyu Islands corresponding  
299 to traditionally recognized *C. barometz*, the other comprising five samples from  
300 NW Yunnan and NE Myanmar (Clade A, Figure 5). Plastome characteristics including  
301 IR size and GC content as well as Dxy value also support the genetic difference of the  
302 Yunnan-Myanmar *Cibotium* from the widespread *C. barometz*. Therefore, we named  
303 these Yunnan-Myanmar samples as a new species, *Cibotium sino-burmaense*,  
304 hereafter.

305 We compared specimens of *C. sino-burmaense* with *C. barometz*, and found  
306 obvious differences of pinnules and sori characters (see details in the taxonomic  
307 treatment part). We checked spores of *C. sino-burmaense*, and found them shared  
308 similar perine features with other Asian species photographed by Gastony (1982) with  
309 strongly developed equatorial and distal ridges. However, the equatorial diameter of  
310 exospores is significantly larger (41-55  $\mu\text{m}$ ) than those of *C. barometz* from S China  
311 (30-45  $\mu\text{m}$ ). Additionally, we estimated the nuclear DNA content of our samples by  
312 flow cytometry with *Capsicum annuum* var. *annuum* (3.38 pg/C, Moscone et al.,  
313 2003) as the internal standard. Our results showed no incongruence with the record of  
314 *C. barometz* (4.58 pg/C, Clark et al., 2016) and detected no significant ploidy  
315 variation signal of *C. sino-burmaense* comparing with *C. barometz* (Figure S3). Our  
316 study also suggested two traditionally used cpDNA fragments (*trnL-trnF* and *trnG-*  
317 *trnR*) as well as five new barcodes that are highly effective in discriminating the new  
318 *Cibotium* species from other species of China. These genetic tools will be of benefit to  
319 the conservation of the Yunnan-Myanmar *C. sino-burmaense*, a cryptic species  
320 endemic to this region.

## 321 **Genetic divergence of *C. barometz* in China**

322 In recent decades, integrating principles and methodologies such as taxonomy,  
323 phylogeny, and evolutionary ecology, has become a trend in aiding medicinal  
324 discovery, identification, and conservation (Sun et al., 2021; Xu et al., 2021; Zaman et  
325 al., 2021). Here, by means of phylogenomic analyses, we clarified the species  
326 boundary and presented the lineage divergence and geographic pattern of *C. barometz*  
327 in China, the highly demanded original resource of “Gouji”. Comparing with previous  
328 studies constrained in limited sampling areas (e.g., Wu et al., 2007; You and Deng,  
329 2012), results of this study revealed the east-west divergence throughout the whole  
330 distribution region in S China. The geographic boundary is close to two general  
331 phylogeographic breaks of the Sino-Japanese floristic region, i.e. ca. 105°E and the  
332 boundary between the Second and Third ladders of landform in China as reviewed by  
333 Ye et al. (2017). Climate of the east and west sides of 105°E are dominated by Pacific  
334 and Indian monsoons respectively (Qiu et al., 2011), while altitude is significantly  
335 varied between and within different ladders (Li et al., 2013), which also shaped  
336 diverse ecological conditions (Fang et al., 2004). Heterogeneous climate and landform  
337 as well as refugia isolation resulted from intensity changes of monsoons may  
338 contributed to the east-west genetic split of *C. barometz* as demonstrated in other  
339 plant lineages (e.g., Bai et al., 2014; Sun et al., 2014; Kou et al., 2016). Additionally,  
340 the genetic difference also suggested that the east and west lineages should be  
341 concerned as at least two management units with respective genetic characters for  
342 conservation (Palsbøll et al., 2007). In the further, studies with population-level  
343 sampling of *C. barometz* and biparentally inherited nuclear genome data would  
344 evaluate within-population diversity on a finer scale, trace demographic history  
345 backwards, and predict the vulnerability of different lineages under the influence of  
346 habitat fragmentation and changing climate.

347 A large number of case studies have emphasized the fundamental role of  
348 germplasm resources played in high-quality genuine medicine production (e.g., Yao et  
349 al., 2020; Cheng et al., 2021; Xu et al., 2023). At present, all the cibotii rhizome slices  
350 sold on market come from natural sources without domestication, which varied

351 seriously on medicinal quality (Ju et al., 2012; Yang et al., 2015). Environmental  
352 conditions affect the synthesis and accumulation of secondary metabolites which are  
353 usually medicinal components in plants (Li et al., 2020). Therefore, it is expected that  
354 *C. barometz* populations grow in habitats with diverged climate and ecology will also  
355 show pharmacodynamic difference. The diverged genetic background showed in this  
356 study will be beneficial to select specific high-quality germplasm resources from  
357 natural populations for cultivation, and elucidate the influence of multiple external  
358 factors on synthesis pathways of metabolites.

### 359 **Key to three *Cibotium* species of China**

- 360 1a. Pinnules on basiscopic side of lower pinnae present or only one absent, rarely with  
361 two absent; sori 1–10 per pinnule segments ..... 2
- 362 2a. Pinnules on acroscopic and basiscopic sides of a pinna nearly equal in length;  
363 apex of pinnule segments apiculate; sori oblong, usually 1–5 pairs per pinnule  
364 segment; average exospore equatorial diameter less than 43  $\mu\text{m}$  ... 1. *C. barometz*
- 365 2b. Pinnules on basiscopic side of a pinna much shorter (c. 1/2) than those on the  
366 acroscopic side; apex of pinnule segments acute; sori oblong to spherical, usually  
367 4–8 and sometimes over 10 pairs per pinnule segment; average exospore  
368 equatorial diameter more than 45  $\mu\text{m}$  ..... 2. *C. sino-burmaense*
- 369 1b. Pinnules on basiscopic side of lower pinnae usually three lacking; sori usually one  
370 or two per pinnule segment ..... 3. *C. cumingii*

### 371 **Taxonomic treatment**

372 (1) *Cibotium barometz* (L.) J. Sm., London J. Bot. 1 (1842) 437.

373  $\equiv$  *Polypodium barometz* L., Sp. Pl. 2 (1753) 1092.

374  $\equiv$  *Aspidium barometz* (L.) Willd., Sp. Pl., ed. 4 [Willdenow] 5 (1810) 268.

375  $\equiv$  *Nephrodium barometz* (L.) Sweet, Hort. Brit. [Sweet], ed. 2. (1830) 580.

376  $\equiv$  *Dicksonia barometz* (L.) Link, Fil. Spec. (1841) 166.

377 Type: —Not designated.

378  $\equiv$  *Cibotium assamicum* Hook., Sp. Fil. [W. J. Hooker] 1 (1844) 83, t.29B.

379 Holotype: —India. Assam, *Mrs. Mack s.n.* (in Sp. Fil. [W. J. Hooker] 1 (1844)  
380 t.29B).

381 = *Balantium glaucescens* Link, Fil. Spec. (1841) 40.

382 Type: —Not designated.

383 = *Cibotium glaucescens* Kunze, Farnkräuter 1 (1841) 63, t.31.

384 Holotype: —*s.coll. s.n.* (In Farnkräuter 1 (1841) 63, t.31.).

385 = *Dicksonia assamicum* Griff., Notul. 2 (1849) 607.

386 Lectotype (designated here): —India. Assam, *Griffith s.n.* (K barcode

387 K001090393 [image!]).

388 Notes: —None original material of both basionyms, i.e., *Polypodium barometz*  
389 and *Balantium glaucescens*, was traced (see discussion by Holttum in *Fl. Malesiana*,  
390 ser. II, 1 (1963) 166).

391 Distribution: —China (Chongqing, Fujian, Guangdong, Guangxi, Guizhou,  
392 Hainan, Hunan, Jiangxi, Sichuan, Taiwan, Xizang, Yunnan, Zhejiang), Japan (Ryukyu  
393 Islands), Indonesia (Java to Sumatra), Malaysia, Myanmar, Thailand, Vietnam.

394 (2) *Cibotium sino-burmaense* X.C.Zhang & S.Q.Liang, sp. nov. (Figure 7)

395 Diagnosis: —This new species resembles *C. barometz* and *C. cumingii*, differing  
396 from the former in the significantly shortened pinnule length on basisopic side, as  
397 well as acute apex and more sori of pinnule segments, and from the latter in the  
398 denser sori per pinnule segment and presence of the second and third pinnules on the  
399 basisopic side of lower pinnae.

400 Holotype: —**China**. Yunnan: Gongshan county, Dulongjiang Township, 2 May  
401 2022, *X.C. Zhang 12880* (PE).

402 Note: —The holotype consists of a single large frond mounted on fifteen  
403 herbarium sheets, labelled “sheet 1” to “sheet 15”.

404 Description: —Rhizome prostrate, stout, densely covered with shiny yellowish  
405 brown long hairs. Stipes thick, up to 80 cm or more, dark brown to purplish black at  
406 base and becoming green upwards, covered with long hairs similar to those on  
407 rhizome at base, upper part covered with small, appressed flaccid hairs. Lamina ovate,  
408 2-pinnate-pinnatifid, up to 3 m, subleathery, adaxial surface deep green, abaxial  
409 surface glaucous, with small flaccid hairs on midrib; pinna 8–10 pairs, alternate,  
410 stalked, medial pinnae 60–80 × 20–30 cm, basal pinna pairs reduced slightly; pinnules



411 more than 30 pairs per lower pinna, shortly stalked, up to 20 cm on the acroscopic  
412 side, 10-14 cm on the basisopic side; pinnule segments, alternate, slightly falcate,  
413 with acute apex, margins crenulate to serrulate-serrate. Sori oblong to spherical,  
414 usually 4–8 and sometime over 10 pairs at base of lower pairs of pinnule segments;  
415 indusia bivalvate, outer indusia larger, orbicular, inner significantly smaller, oblong.  
416 Spores pale yellowish, with strongly developed equatorial and distal ridges.

417 Etymology: —*Sino-burmaense* is derived from the known distribution of this  
418 species along China-Myanmar border.

419 Additional Specimens Examined: —**China.** Yunnan: Gongshan county,  
420 Dulongjiang Township, 23 Jan 2017, *X.C. Zhang & al.* 8134; Fugong County, 26 Apr  
421 2022, *X.C. Zhang* 12831. **Myanmar.** Kachin: Htawgaw, Apr 1925, *G. Forrest* 26496  
422 (PE barcode 01654827, 01654828, 00388348).

423 Distribution and habitat: —China (NW Yunnan), Myanmar (Kachin). On cliff  
424 with open canopy.

425 (3) *Cibotium cumingii* Kunze, *Farrnkräuter* 1 (1841) 64, 65.

426 ≡ *Cibotium barometz* var. *cumingii* (Kunze) C. Chr., *Index Filic.* 3 (1905) 183.

427 Lectotype (designated here): —Philippines. Luzon, *H. Cuming* 123 (K barcode  
428 K000376224 [image!]; isolectotypes: K barcode K000376225 [image!], K000376228,  
429 K000376229, K000376231, K000376232; BM barcode BM001048122 [image!]; E  
430 barcode E00822366 [image!], E00822367 [image!], E00822369 [image!], E00822373  
431 [image!]; P barcode P00633260 [image!], P00633261 [image!], P00633262 [image!];  
432 US barcode 00134826 [image!]; Z barcode Z-000002072 [image!]).

433 = *Cibotium crassinerve* Rosenst., *Meded. Rijks-Herb.* 31 (1917) 4.

434 Lectotype (designated here): —Philippines. Luzon, Benguet, Dec 1908, *H. M.*  
435 *Curran & M. L. Merritt* 15800 (L barcode L 0051165 [image!]; isolectotype: MICH  
436 No. 1190172 [image!]).

437 = *Cibotium taiwanense* C.M.Kuo, *Taiwania* 30 (1985) 56, 57.

438 Lectotype (designated here): —China. Taiwan, Hsinchu, Chu-tong, Aug 1972, *C.*  
439 *M. Kuo* 1703 (TAI No. 149443 [image!]; isolectotypes: TAI No. 148725 [image!],  
440 150173 [image!]).



441 Distribution: —China (Taiwan), Japan (Ryukyu Islands), Phillipines.

## 442 **CONCLUSION**

443 This study presented conserved structure and gene composition of chloroplast genome  
444 within *Cibotium* from China. Based on phylogenomic analyses, we constructed a  
445 well-supported phylogeny of Chinese *Cibotium*, and indicated that there are three  
446 species distribute in China, namely *C. barometz*, *C. cumingii*, and *C. sino-burmaense*,  
447 an overlooked cryptic species from the NW Yunnan and NE Myanmar. Moreover, our  
448 results uncovered the east-west lineage divergence in *C. barometz*. We also evaluated  
449 the species resolution of nine old cpDNA loci, and suggested five new cpDNA  
450 barcodes which are capable to identify all the above-mentioned species and lineages  
451 of Chinese *Cibotium* accurately. In conclusion, our findings will improve people’s  
452 understanding on the germplasm resource diversity of this endangered medicinal plant  
453 group, and play a guiding role in its wild population conservation and medical value  
454 exploitation.

## 455 **DATA AVAILABILITY STATEMENT**

456

## 457 **AUTHOR CONTRIBUTIONS**

458 X-CZ, K-XL and R-HJ designed this study. FW, L-MT, BQ, Y-YC and Y-HH  
459 collected and cultivated plant materials of this study. S-QL performed experiments,  
460 analyzed the data, and wrote the manuscript.

## 461 **FUNDING**

462 This research was supported by “Evaluation of the Germplasm Resources of the  
463 Protected Plant *Cibotium barometz*” project (GuiLinYan[RC]2302) of Guangxi  
464 Forestry Research Institute, the National Plant Specimen Resource Center Project  
465 (NPSRC) (E0117G1001), “Field Survey and Conservation Studies of some State Key  
466 Protected Fern Species” project in National Forestry and Grassland Administration,  
467 “2022 Central Financial Forestry Reform and Development Funds: Collection,  
468 Conservation and Use of Germplasm Resources of *Cibotium barometz*” of  
469 Department of Forestry of Guangxi Zhuang Autonomous Region, as well as “Survey  
470 and Collection of Germplasm Resources of Woody and Herbaceous Plants in

471 Guangxi, China” (GXFS-2021-34).

## 472 **ACKNOWLEDGMENTS**

473 We appreciate Dr. Xiang-Yun Zhu for valuable discussion about taxonomic treatment.

474 We thank Dr. Jie Yang, Mr. Jun-Yong Tang and Mr. Ji-Gao Yu for their help in  
475 plastome data analyses. We also thank Jin-Dan Zhang from the Plant Science Facility  
476 of the Institute of Botany, Chinese Academy of Sciences for the technical assistance  
477 on flow cytometry.

## 478 **REFERENCES**

- 479 Bai, W.N., Wang, W. T., and Zhang, D.Y. (2014). Contrasts between the  
480 phylogeographic patterns of chloroplast and nuclear DNA highlight a role for  
481 pollen-mediated gene flow in preventing population divergence in an East Asian  
482 temperate tree. *Mol. Phylogenet. Evol.* 81, 37–48. doi:  
483 10.1016/j.ympev.2014.08.024
- 484 Brudno, M., Do, C. B., Cooper, G. M., Kim, M. F., Davydov, E., NISC Comparative  
485 Sequencing Program, et al. (2003). LAGAN and Multi-LAGAN: Efficient Tools  
486 for Large-Scale Multiple Alignment of Genomic DNA. *Genome Res.* 13, 721–  
487 731. doi: 10.1101/gr.926603
- 488 Castresana, J. (2000). Selection of conserved blocks from multiple alignments for  
489 their use in phylogenetic analysis. *Mol. Biol. Evol.* 17, 540–552. doi:  
490 10.1093/oxfordjournals.molbev.a026334
- 491 Chen, S. L., Yu, H., Luo, H. M., Wu, Q., Li, C. F., and Steinmetz, A. (2016).  
492 Conservation and sustainable use of medicinal plants: problems, progress, and  
493 prospects. *BMC Chin. Med.* 11:37. doi: 10.1186/s13020-016-0108-7
- 494 Chen, S. S., Zhang, M. H., Wang, J. X., and Zhang, X. C. (2021). Original plant and  
495 research progress of the medicinal plant *Huperzia javanica*. *Guihaia* 4111, 1794–  
496 1809. doi: 10.11931/guihaia.gxzw202103069
- 497 Cheng, R. Y., He, W. R., Shen, X. F., Xiang, L., Liang, Y., Meng, Y., et al. (2021).  
498 Analysis on Content Differences of Artemisinin and Arteannuin B in Different  
499 Provenances of *Artemisia annua* Under Indoor Hydroponic Conditions. *Chin. J.*  
500 *Exp. Tradit. Med. Formulae* 27, 145–151. doi: 10.13422/j.cnki.syfjx.20211547

- 501 Chinese Pharmacopoeia Commission [CPC] (2020). *Chinese Pharmacopoeia*, 1st  
502 Edn. Beijing: Chinese Medical Science and Technology Press.
- 503 Clark, J., Hidalgo, O., Pellicer, J., Liu, H., Marquardt, J., Robert, Y., et al. (2016).  
504 Genome evolution of ferns: evidence for relative stasis of genome size across the  
505 fern phylogeny. *New Phytol.* 210, 1072–1082. doi: 10.1111/nph.13833
- 506 Cuong, N. X., Minh, C. V., Kiem, P. V., Huong, H. T., Ban, N. K., Nhiem, N. X., et al.  
507 (2009). Inhibitors of osteoclast formation from rhizomes of *Cibotium barometz*. *J*  
508 *Nat Prod.* 72, 1673–1677. doi: 10.1021/np9004097
- 509 Doyle, J. J., and Doyle, J. L. (1987). A rapid DNA isolation procedure for small  
510 quantities of fresh leaf tissue. *Phytochem. Bull. Bot. Soc. Amer.* 19, 11–15. doi:  
511 10.1016/0031-9422(80)85004-7
- 512 Du, X. Y., Kuo, L. Y., Zuo, Z. Y., Li, D. Z., and Lu, J. M. (2022). Structural variation  
513 of plastomes provides key insight into the deep phylogeny of ferns. *Front. Plant*  
514 *Sci.* 13:862772. doi: 10.3389/fpls.2022.862772
- 515 Fang, J. Y., Shen, Z. H., and Cui, H. T. (2004). Ecological characteristics of mountains  
516 and research issues of mountain ecology. *Biodiversity Sci.* 12, 10–19.
- 517 Fu, C. L., Zheng, C. S., Lin, J., Ye, J. X., Mei, Y. Y., Pan, C. B., et al. (2017).  
518 *Cibotium barometz* polysaccharides stimulate chondrocyte proliferation *in vitro*  
519 by promoting G1/S cell cycle transition. *Mol. Med. Rep.* 15, 3027–3034. doi:  
520 10.3892/mmr.2017.6412
- 521 Gastony, J. (1982). Spore morphology in the Dicksoniaceae. II. The genus *Cibotium*.  
522 *Can. J. Bot.* 60, 955–972.
- 523 Geiger, J. M. O., Korall, P., Ranker, T. A., Kleist, A. C., and Nelson, C. L. (2013).  
524 Molecular Phylogenetic Relationships of *Cibotium* and Origin of the Hawaiian  
525 Endemics. *Am. Fern J.* 103, 141–152. doi: 10.1640/0002-8444-103.3.141
- 526 Greiner, S., Lehwark, P., and Bock, R. (2019). OrganellarGenomeDRAW  
527 (OGDRAW) version 1.3.1: expanded toolkit for the graphical visualization of  
528 organellar genomes. *Nucleic Acids Res.* 47, W59–W64. doi: 10.1093/nar/gkz238
- 529 Hammer, T. A., Zhong, X., des Francs-Small, C. C., Nevill, P. G., Small, I. D., and  
530 Thiele, K.R. (2019). Resolving intergeneric relationships in the aevroid clade and

- 531 the backbone of *Ptilotus* (Amaranthaceae): Evidence from whole plastid  
532 genomes and morphology. *Taxon* 68, 297–314. doi: 10.1002/tax.12054
- 533 Heng, Y. W., Ban, J. J., Khoo, K. S., and Sit, N. W. (2020). Biological activities and  
534 phytochemical content of the rhizome hairs of *Cibotium barometz* (Cibotiaceae).  
535 *Ind. Crops Prod.* 153: 112612. doi: 10.1016/j.indcrop.2020.112612
- 536 Hollingsworth, P. M., Li, D. Z., Van Der Bank, M., and Twyford, A. D. (2016). Telling  
537 plant species apart with DNA: from barcodes to genomes. *Philos. Trans. R. Soc.*  
538 *B* 371:20150338. doi: 10.1098/rstb.2015.0338
- 539 Holttum, R.E. (1963). “*Cibotium*,” in *Flora Malesiana*, Ser. II, Vol. 1, eds C. G. G. J.  
540 Van Steenis and R.E. Holttum (Netherlands: Martinus Nijhoff. Dr W. Junk  
541 Publishers), 164–166.
- 542 Huang, L. Q., Guo, L. P., Hu, J., and Shao, A. J. (2008). Molecular mechanism and  
543 genetic basis of geoh herbs. *China J. Chin. Mater. Med.* 33, 2303–2308.
- 544 Huang, Z., Luo, X., Zhang, Y., Ying, Y., Cai, X., Lu, W., et al. (2021). Notoginseng  
545 Triterpenes Inhibited Autophagy in Random Flaps *via* the Beclin-1/VPS34/LC3  
546 Signaling Pathway to Improve Tissue Survival. *Front. Bioeng. Biotechnol.*  
547 9:771066. doi: 10.3389/fbioe.2021.771066
- 548 Ji, Y., Yang, J., Landis, J. B., Wang, S., Yang, Z., and Zhang, Y. (2021). Deciphering  
549 the taxonomic delimitation of *Ottelia acuminata* (Hydrocharitaceae) using  
550 complete plastomes as super-barcodes. *Front. Plant Sci.* 12:681270. doi:  
551 10.3389/fpls.2021.681270
- 552 Jin, J. J., Yu, W. B., Yang, J. B., Song, Y., de Pamphilis, C. W., Yi, T. S., et al. (2020).  
553 GetOrganelle: A fast and versatile toolkit for accurate de novo assembly of  
554 organelle genomes. *Genome Biol.* 21:241. doi: 10.1186/s13059-020-02154-5
- 555 Ju, C. G., Cao, C. X., Shi, L., Li, J., and Jia, T. Z. (2005). Study on the analgesic and  
556 haemostatic effects of cibotii rhizoma, its concoction products and hairs of  
557 cibotii rhizome. *Chin. Tradit. Pat. Med.* 27, 1279–1281.
- 558 Ju, C. G., Xu, G., Song, Y. J., Zhao, W. L., and Jia, T. Z. (2012). Comparison of the  
559 Content of Total Phenolic Acid in *Cibotium barometz* and its Processed Products  
560 from Different Areas. *Chin. J. Exp. Tradit. Med. Formulae* 18, 24–26.

- 561 Kalyaanamoorthy, S., Minh, B. Q., Wong, T. K. F., von Haeseler, A., and Jermin, L.  
562 S. (2017). ModelFinder: Fast model selection for accurate phylogenetic  
563 estimates. *Nat. Methods* 14, 587–589. doi: 10.1038/nmeth.4285
- 564 Katoh, K., and Standley, D. M. (2013). MAFFT multiple sequence alignment software  
565 version 7: improvements in performance and usability. *Mol. Biol. Evol.* 30, 772–  
566 780. doi: 10.1093/molbev/mst010
- 567 Kearse, M., Moir, R., Wilson, A., Stones-Havas, S., Cheung, M., Sturrock, S., et al.  
568 (2012). Geneious Basic: An integrated and extendable desktop software platform  
569 for the organization and analysis of sequence data. *Bioinformatics* 28, 1647–  
570 1649. doi: 10.1093/bioinformatics/bts199
- 571 Khoury, C. K., Brush, S., Costich, D. E., Curry, H. A., de Haan, S., Engels, J. M. M.,  
572 et al. (2022). Crop genetic erosion: understanding and responding to loss of crop  
573 diversity. *New Phytol.* 233, 84–118. doi: 10.1111/nph.17733
- 574 Korall, P., Pryer, K. M., Metzgar, J. S., Schneider, H., and Conant, D. S. (2006). Tree  
575 ferns: Monophyletic groups and their relationships as revealed by four protein-  
576 coding plastid loci. *Mol. Phylogenet. Evol.* 39, 830–845. doi:  
577 10.1016/j.ympev.2006.01.001
- 578 Koressaar, T., and Remm, M. (2007). Enhancements and modifications of primer  
579 design program Primer3. *Bioinformatics* 23, 1289–1291. doi:  
580 10.1093/bioinformatics/btm091
- 581 Kou, Y. X., Cheng, S. M., Tian, S., Li, B., Fan, D. M., Chen, Y.J., et al. (2016). The  
582 antiquity of *Cyclocarya paliurus* (Juglandaceae) provides new insights into the  
583 evolution of relict plants in subtropical China since the late Early Miocene. *J.*  
584 *Biogeogr.* 43, 351–360. doi: 10.1111/jbi.12635
- 585 Kress, W. J., García-Robledo, C., Uriarte, M., and Erickson, D. L. (2015). DNA  
586 barcodes for ecology, evolution, and conservation. *Trends Ecol. Evol.* 30, 25–35.  
587 doi: 10.1016/j.tree.2014.10.008
- 588 Kumar, S., Stecher, G., Li, M., Knyaz, C., and Tamura, K. (2018). MEGA X:  
589 molecular evolutionary genetics analysis across computing platforms. *Mol. Biol.*  
590 *Evol.* 35, 1547–1549. doi: 10.1093/molbev/msy096

- 591 Li, B. Y., Pan, B. T., Cheng, W. M., Han, J. F., Qi, D. L., and Zhu, C. (2013). Research  
592 on geomorphological regionalization of China. *Acta Geogr. Sin.* 68, 291–306.
- 593 Li, T. Q., Lei, W., Ma, Z. S., Wang, L., Wu, Z. X., and Zhao, X. (2014). Experimental  
594 study of the effect of *Cibotium barometz* extract on ovariectomy-induced  
595 osteoporosis in rats. *Chin. J. Osteoporosis* 20, 736–740. doi: 10.3969/j.issn.1006-  
596 7108.2014.07.004
- 597 Li, Y. Q., Kong, D. X., Fu, Y., Sussman, M. R., and Wu, H. (2020). The effect of  
598 developmental and environmental factors on secondary metabolites in medicinal  
599 plants. *Plant Physiol. Biochem.* 148, 80–89. doi: 10.1016/j.plaphy.2020.01.006
- 600 Liu, S., Wang, Z., Wang, T., and Su, Y. (2018). The complete chloroplast genome of  
601 *Cibotium barometz* (Cibotiaceae), an endangered CITES medicinal fern.  
602 *Mitochondrial DNA, Part B: Resources* 3, 464–465. doi:  
603 10.1080/23802359.2018.1462128
- 604 Lowe, T. M., and Chan, P. P. (2016). tRNAscan-SE On-line: integrating search and  
605 context for analysis of transfer RNA genes. *Nucleic Acids Res.* 44, W54–W57.  
606 doi: 10.1093/nar/gkw413
- 607 Ma, X. J., and Xiao, P. G. (1998). Genetic diversity of germplasm resources in the  
608 importance of genetic diversity in the development of medicinal plants. *China J.*  
609 *Chin. Mater. Med.* 23, 579–581.
- 610 Meng, X. C., Deng, D. Q., Du, H. W., and Guan, Y. (2023). Scientific connotation of  
611 high-quality genuine medicinal materials. *Chin. Tradit. Herb. Drugs* 54, 939–  
612 947. doi: 10.7501/j.issn.0253-2670.2023.03.028
- 613 Minh, B. Q., Nguyen, M. A. T., and von Haeseler, A. (2013). Ultrafast approximation  
614 for phylogenetic bootstrap. *Mol. Biol. Evol.* 30, 1188–1195. doi:  
615 10.1093/molbev/mst024
- 616 Moscone, E. A., Baranyi, M., Ebert, I., Greilhuber, J., Ehrendorfer, F., and Hunziker,  
617 A. T. (2003). Analysis of nuclear DNA content in *Capsicum* (Solanaceae) by  
618 flow cytometry and feulgen densitometry. *Ann. Bot.* 92, 21–29. doi:  
619 10.1093/aob/mcg105
- 620 Newman, D. J., Kilama, J., Bernstein, A., and Chivian, E. (2008). “Medicines from

- 621 nature,” in *Sustaining Life: How human health depends on biodiversity*, eds E,  
622 Chivian and A. Bernstein (New York: Oxford University Press), 117–161.
- 623 Nguyen, L. T., Schmidt, H. A., von Haeseler, A., and Minh, B. Q. (2015). IQ-TREE: A  
624 fast and effective stochastic algorithm for estimating maximum-likelihood  
625 phylogenies. *Mol. Biol. Evol.* 32, 268–274. doi: 10.1093/molbev/msu300
- 626 Nock, C. J., Waters, D. L., Edwards, M. A., Bowen, S. G., Rice, N., Cordeiro, G. M.,  
627 et al. (2011). Chloroplast genome sequences from total DNA for plant  
628 identification. *Plant Biotechnol. J.* 9, 328–333. doi: 10.1111/j.1467-  
629 7652.2010.00558.x
- 630 Palmer, D. D. (1994). The Hawaiian species of *Cibotium*. *Am. Fern J.* 84, 73–85. doi:  
631 10.2307/1547274
- 632 Palsbøll, P. J., Bérubé, M., and Allendorf, F. W. (2007). Identification of management  
633 units using population genetic data. *Trends Ecol. Evol.* 22, 11–16. doi:  
634 10.1016/j.tree.2006.09.003
- 635 Park, I., Song, J. H., Yang, S., Chae, S., and Moon, B. C. (2021). Plastid  
636 phylogenomic data offers novel insights into the taxonomic status of the  
637 *Trichosanthes kirilowii* Complex (Cucurbitaceae) in South Korea. *Front. Plant*  
638 *Sci.* 12:559511. doi: 10.3389/fpls.2021.559511
- 639 Qin, M., Zhu, C. J., Yang, J. B., Vatanparast, M., Schley, R., Lai, Q., et al. (2022).  
640 Comparative analysis of complete plastid genome reveals powerful barcode  
641 regions for identifying wood of *Dalbergia odorifera* and *D. tonkinensis*  
642 (Leguminosae). *J. Syst. Evol.* 60, 73–84. doi: 10.1111/jse.12598
- 643 Qiu, Y. X., Fu, C. X., and Comes, H.P. (2011). Plant molecular phylogeography in  
644 China and adjacent regions: Tracing the genetic imprints of Quaternary climate  
645 and environmental change in the world’s most diverse temperate flora. *Mol.*  
646 *Phylogenet. Evol.* 59, 225–244. doi: 10.1016/j.ympev.2011.01.012
- 647 Rambaut, A. (2014). *FigTree v 1.4. 2 Molecular Evolution, Phylogenetics and*  
648 *Epidemiology*. Edinburgh: Univ. Edinburgh, Inst. Evol. Biol.
- 649 Rambaut, A., Drummond, A. J., Xie, D., Baele, G., and Suchard, M. A. (2018).  
650 Posterior summarisation in Bayesian phylogenetics using Tracer 1.7. *Syst. Biol.*



- 651           67, 901–904. doi: 10.1093/sysbio/syy032
- 652 Ronquist, F., Teslenko, M., van der Mark, P., Ayres, D. L., Darling, A., and Höhna, S.
- 653           (2012). MrBayes 3.2: Efficient Bayesian Phylogenetic Inference and Model
- 654           Choice Across a Large Model Space. *Syst. Biol.* 61, 539–542. doi:
- 655           10.1093/sysbio/sys029
- 656 Rozas, J., Ferrer-Mata, A., Sánchez-Delbarrio, J. C., Guirao-Rico, S., Librado, P.,
- 657           Ramos-Onsins, S. E., et al. (2017). DnaSP 6: DNA sequence polymorphism
- 658           analysis of large data sets. *Mol. Biol. Evol.* 34, 3299–3302. doi:
- 659           10.1093/molbev/msx248
- 660 Schoen, D. J. and Brown, H. D. (1993). Conservation of allelic richness in wild crop
- 661           relatives is aided by assessment of genetic markers. *Proc. Natl. Acad. Sci. U.S.A.*
- 662           910, 10623–10627. doi: 10.1073/pnas.90.22.10623
- 663 Smith, A. R., Pryer, K. M., Schuettpelz, E., Korall, P., Schneider, H., and Wolf, P. G.
- 664           (2006). A classification for extant ferns. *Taxon* 55, 705–731. doi:
- 665           10.2307/25065646
- 666 State Forestry and Grassland Administration and the Ministry of Agriculture and
- 667           Rural Affairs, P. R. China (2021). List of Wild Plants Under State Protection.
- 668           Decree No.15.
- 669           <http://www.forestry.gov.cn/main/5461/20210908/162515850572900.html>
- 670 Sun, J. H., Liu, B., Guo, L. P., and Huang, L. Q. (2021). Significance of plant
- 671           taxonomy in Chinese material medica resources: the changes of family and
- 672           genus category and standardization of scientific names in Chinese
- 673           Pharmacopoeia. *Sci. Sin. Vitae* 51, 579–593. doi: 10.1360/SSV-2020-0345
- 674 Sun, Q. Z. (2021). *Cibotium barometz* polysaccharide regulates IL-1 $\beta$ -mediated
- 675           proliferation and apoptosis in osteoarthritis chondrocyte via miR-181c. *Chin. J.*
- 676           *Gerontol.* 41, 2398–2402. doi: 10.3969/j.issn.1005-9202.2021.11.046
- 677 Sun, Y., Hu, H., Huang, H., and Vargas-Mendoza, C. F. (2014). Chloroplast diversity
- 678           and population differentiation of *Castanopsis fargesii* (Fagaceae): a dominant
- 679           tree species in evergreen broad-leaved forest of subtropical China. *Tree Genet.*
- 680           *Genomes* 10, 1531–1539. doi: 10.1007/s11295-014-0776-3

- 681 Tillich, M., Lehwark, P., Pellizzer, T., Ulbricht-Jones, E. S., Fischer, A., Bock, R., et  
682 al. (2017). GeSeq – versatile and accurate annotation of organelle genomes.  
683 *Nucl. Acids Res.* 45, W6–W11. doi:10.1093/nar/gkx391
- 684 Tu, Y. (2016). Artemisinin—A gift from traditional Chinese medicine to the world  
685 (Nobel Lecture). *Angew. Chem. Int. Ed. Engl.* 55, 10210–10226. doi:  
686 10.1002/anie.201601967
- 687 Untergasser, A., Cutcutache, I., Koressaar, T., Ye, J., Faircloth, B. C., Remm, M., et al.  
688 (2012). Primer3-new capabilities and interfaces. *Nucleic Acids Res.* 40:e115. doi:  
689 10.1093/nar/gks596
- 690 Volfovsky, N., Haas, B. J., and Salzberg, S. L. (2001). A clustering method for repeat  
691 analysis in DNA sequences. *Genome Biol.* 2: 1–11. doi: 10.1186/gb-2001-2-8-  
692 research0027
- 693 Wang, J., Fu, C. N., Mo, Z. Q., Möller, M., Yang, J. B., Zhang, Z. R., et al. (2022).  
694 Testing the complete plastome for species discrimination, cryptic species  
695 discovery and phylogenetic resolution in *Cephalotaxus* (Cephalotaxaceae).  
696 *Front. Plant Sci.* 13:768810. doi: 10.3389/fpls.2022.768810
- 697 Wei, R. and Zhang, X. C. (2020). Phylogeny of *Diplazium* (Athyriaceae) revisited:  
698 Resolving the backbone relationships based on plastid genomes and phylogenetic  
699 tree space analysis. *Mol. Phylogenet. Evol.* 143:106699. doi:  
700 10.1016/j.ympev.2019.106699
- 701 Wei, X. P., Zhang, X. Y., Dong, Y. Q., Cheng, J. L., Bai, Y. J., Liu, J. S., et al. (2022).  
702 Molecular structure and phylogenetic analyses of the complete chloroplast  
703 genomes of three medicinal plants *Conioselinum vaginatum*, *Ligusticum sinense*,  
704 and *Ligusticum jeholense*. *Front. Plant Sci.* 13:878263. doi:  
705 10.3389/fpls.2022.878263
- 706 Wu, L., Deng, H. P., Xu, J., Song, Q. Z., Liu, G. H., Zhang, L. R., et al. (2007). AFLP  
707 analysis of genetic diversity in *Cibotium barometz* populations. *China J. Chin.*  
708 *Mater. Med.* 32, 1468–1469.
- 709 Xi, J., Lv, S., Zhang, W., Zhang, J., Wang, K., Guo, H., et al. (2022). Comparative  
710 plastomes of *Carya* species provide new insights into the plastomes evolution

- 711 and maternal phylogeny of the genus. *Front. Plant Sci.* 13:990064. doi:  
712 10.3389/fpls.2022.990064
- 713 Xu, J. X., Wang, Y. L., Wang, J. J., Tang, W., Chen, L. J., and Long, C. L. (2012).  
714 Chemical constituents of *Cibotium barometz* and their bioactivities. *Nat. Prod.*  
715 *Res. Dev.* 24, 134–140.
- 716 Xu, Y. L., Wang, Z. Y., Yang, S. D., and Lu, L. (2021). Application and prospect of  
717 evolutionary ecology in evaluation of germplasm resources of medicinal plants.  
718 *Chin. Tradit. Herb. Drugs* 52: 1221–1233. doi: 10.7501/j.issn.0253-  
719 2670.2021.05.001
- 720 Xu, Y. Y., Li, K., Jiao, R., Wang, Q., Wang, Z., Shi, B., et al. (2023). Evaluation and  
721 screening of superior germplasms in *Paris polyphylla* var. *yunnanensis*. *J.*  
722 *Southwest For. Univ.* 43, 36–41. doi: 10.11929/j.swfu.202112068
- 723 Yang, C. Z., Liu, X. F., Cai, D. L., and Fan SM. (2015). Investigation on resource and  
724 quality assessment of *Cibotii Rhizoma*. *China J. Chin. Mater. Med.* 40: 1919–  
725 1924. doi: 10.4268/cjcm20151014
- 726 Yang, J., Xiang, Q. P., and Zhang, X. C. (2023). Uncovering the hidden diversity of  
727 the rosette-forming *Selaginella tamariscina* group based on morphological and  
728 molecular data. *Taxon* 72, 8–19. doi: 10.1002/tax.12817
- 729 Ye, J. W., Zhang, Y., and Wang, X. J. (2017). Phylogeographic breaks and the  
730 mechanisms of their formation in the Sino-Japanese floristic region. *Chin. J.*  
731 *Plant Ecol.* 41, 1003–1019. doi: 10.17521/cjpe.2016.0388
- 732 Yao, J., Wang, W. R., Guo, S. L., and Meng, X. C. (2020). Different germplasm of  
733 *Paeoniae Radix Alba* and *Paeoniae Radix Rubra*. *Mod. Chin. Med.* 22: 1933–  
734 1937. doi: 10.13313/j.issn.1673-4890.20200804001
- 735 You, Y. F. and Deng, H. P. (2012). Analysis of genetic diversity of the rare and  
736 endangered species *Cibotium barometz* by SRAP markers. *Acta Bot. Boreal. –*  
737 *Occident. Sin.* 32, 688–692.
- 738 Yu, Y. B., Wang, Q. L., Kell, S., Maxted, N., Ford-Lloyd, B. V., Wei, W., et al. (2013).  
739 Crop wild relatives and their conservation strategies in China. *Biodiversity Sci.*  
740 21, 750–757. doi: 10.3724/SP.J.1003.2013.08138

- 741 Zaman, W., Ye, J., Saqib, S., Liu, Y., Shan, Z., Hao, D., et al. (2021). Predicting  
742 potential medicinal plants with phylogenetic topology: Inspiration from the  
743 research of traditional Chinese medicine. *J. Ethnopharmacol.* 281,114515. doi:  
744 10.1016/j.jep.2021.114515
- 745 Zangara, A. (2003). The psychopharmacology of huperzine A: an alkaloid with  
746 cognitive enhancing and neuroprotective properties of interest in the treatment of  
747 Alzheimers disease. *Pharmacol. Biochem. Behav.* 75, 675–686. doi:  
748 10.1016/s0091-3057(03)00111-4
- 749 Zhang, X. C., Jia, J. S., and Zhang, G. M. (2002). Survey and evaluation of the natural  
750 resources of *Cibotium barometz* (L.) J. Smith in China, with reference to the  
751 implementation of the CITES convention. *Fern Gaz.* 16, 383–387.
- 752 Zhang, X.C. and Nishida, H. (2013). “Cibotiaceae,” in *Flora of China*, Vol. 2–3  
753 (Pteridophytes), eds Z. Y. Wu, P. H. Raven, and D. Y. Hong (Beijing: Science  
754 Press; St. Louis.: Missouri Botanical Garden Press), 132–133.
- 755 Zhang, Y. J. and Jiang, Y. Y. (2021). Research approach and progress in term of the  
756 quality of Chinese medicinal. *Acta Chin. Med. Pharmacol.* 49: 106–112.
- 757 Zhang, Z. R., Yang, X., Li, W. Y., Peng, Y. Q., and Gao, J. (2022). Comparative  
758 chloroplast genome analysis of *Ficus* (Moraceae): Insight into adaptive evolution  
759 and mutational hotspot regions. *Front. Plant Sci.* 13:965335. doi:  
760 10.3389/fpls.2022.965335
- 761 Zhao, X., Wu, Z. X., Zhang, Y., Yan, Y. B., He, Q., Cao, P. C., et al. (2011) Anti-  
762 osteoporosis activity of *Cibotium barometz* extract on ovariectomy-induced bone  
763 loss in rats. *J. Ethnopharmacol.* 137, 1083–1088. doi: 10.1016/j.jep.2011.07.017

**TABLE 1** Summary of sampling information and plastome characteristics in this study.

| Species                  | Code | Locality                   | Voucher                                      | Total genome size (bp) | GC content (%) | LSC size (bp) | SSC size (bp) | IR size (bp) | Pseudo gene |
|--------------------------|------|----------------------------|----------------------------------------------|------------------------|----------------|---------------|---------------|--------------|-------------|
| <i>C. sino-burmaense</i> | FG1  | Fugong, Yunnan, China      | 12831-1, X. C. Zhang                         | 162,115                | 41.4           | 85,637        | 22,064        | 27,207       | <i>matK</i> |
| <i>C. sino-burmaense</i> | FG2  | Fugong, Yunnan, China      | 12831-2, X. C. Zhang                         | 162,108                | 41.4           | 85,634        | 22,062        | 27,206       | <i>matK</i> |
| <i>C. sino-burmaense</i> | GS1  | Gongshan, Yunnan, China    | 12880-1, X. C. Zhang                         | 162,116                | 41.4           | 85,636        | 22,066        | 27,207       | <i>matK</i> |
| <i>C. sino-burmaense</i> | GS2  | Gongshan, Yunnan, China    | 12880-2, X. C. Zhang                         | 162,112                | 41.4           | 85,634        | 22,064        | 27,207       | <i>matK</i> |
| <i>C. sino-burmaense</i> | HT   | Htawgaw, Kachin, Myanmar   | 26496, G. Forrest*                           | 162,206                | 41.4           | 85,645        | 22,056        | 27,248       | <i>matK</i> |
| <i>C. borametzi</i>      | JP1  | Jinping, Yunnan, China     | PT388-1, Z. Y. Li                            | 165,683                | 41.7           | 85,722        | 22,059        | 28,951       | <i>matK</i> |
| <i>C. borametzi</i>      | ML   | Mengla, Yunnan, China      | 5640, Y. Shang                               | 165,665                | 41.7           | 85,675        | 22,064        | 28,963       | <i>matK</i> |
| <i>C. borametzi</i>      | YJ   | Yingjiang, Yunnan, China   | 7947, X. C. Zhang & Z. Y. Guo                | 166,087                | 41.7           | 85,670        | 22,063        | 29,177       | <i>matK</i> |
| <i>C. borametzi</i>      | MD1  | Medog, Xizang, China       | 05237, B. S. Li & S. Z. Cheng*               | 166,019                | 41.7           | 85,669        | 22,066        | 29,142       | <i>matK</i> |
| <i>C. borametzi</i>      | MD2  | Medog, Xizang, China       | 13841-6, X. C. Zhang & al.                   | 166,099                | 41.7           | 85,683        | 22,068        | 29,174       | <i>matK</i> |
| <i>C. borametzi</i>      | NM   | Ningming, Guangxi, China   | 7897, X. C. Zhang & al.                      | 165,767                | 41.7           | 85,673        | 22,066        | 29,014       | <i>matK</i> |
| <i>C. borametzi</i>      | JX   | Jinxiu, Guangxi, China     | 6042, X. C. Zhang                            | 166,054                | 41.7           | 85,674        | 22,066        | 29,157       | <i>matK</i> |
| <i>C. borametzi</i>      | NC   | Nanchuan, Chongqing, China | 22, Z. Y. Liu                                | 165,653                | 41.7           | 85,694        | 22,017        | 28,944       | <i>matK</i> |
| <i>C. borametzi</i>      | PY   | Pingyang, Zhejiang, China  | s.n.-2, H. Zhang & J. C. Zhang               | 166,033                | 41.7           | 85,667        | 22,054        | 29,156       |             |
| <i>C. borametzi</i>      | XF   | Xinfeng, Jiangxi, China    | lxp-13-22042, Ecology Internship Group, SYSU | 166,051                | 41.7           | 85,673        | 22,054        | 29,162       | <i>matK</i> |
| <i>C. borametzi</i>      | SZ   | Shenzhen, Guangdong, China | 6571, R. H. Jiang & al.                      | 165,983                | 41.7           | 85,656        | 22,053        | 29,137       | <i>matK</i> |
| <i>C. borametzi</i>      | FS   | Foshan, Guangdong, China   | 5493, X. C. Zhang & al.                      | 165,669                | 41.7           | 85,686        | 22,053        | 28,965       |             |
| <i>C. borametzi</i>      | FK   | Fengkai, Guangdong, China  | 5454, X. C. Zhang & al.                      | 166,050                | 41.7           | 85,672        | 22,054        | 29,162       | <i>matK</i> |

|                    |    |                            |                           |         |      |        |        |        |             |
|--------------------|----|----------------------------|---------------------------|---------|------|--------|--------|--------|-------------|
| <i>C. borametz</i> | SG | Shaoguan, Guangdong, China | CBL006, X. C. Zhang & al. | 166,194 | 41.7 | 85,649 | 22,054 | 29,219 | <i>matK</i> |
| <i>C. borametz</i> | LB | Libo, Guizhou, China       | 11209, X. C. Zhang & al.  | 166,016 | 41.7 | 85,781 | 22,054 | 29,142 | <i>matK</i> |
| <i>C. borametz</i> | NJ | Nanjing, Fujian, China     | SH2015120802, X. P. Wei   | 166,030 | 41.7 | 85,664 | 22,054 | 29,156 |             |
| <i>C. borametz</i> | CJ | Changjiang, Hainan, China  | 1558, X. C. Zhang & al.   | 166,443 | 41.7 | 85,697 | 22,048 | 29,349 |             |
| <i>C. borametz</i> | OK | Okinoerabu Island, Japan   | 2410, Y. Saiki*           | 166,041 | 41.6 | 85,673 | 22,052 | 29,158 | <i>matK</i> |
| <i>C. cumingii</i> | TP | Taipei, Taiwan, China      | 1113, W. C. Leong*        | 165,077 | 41.7 | 85,648 | 22,067 | 28,681 | <i>matK</i> |
| <i>C. cumingii</i> | IR | Iriomote Island, Japan     | s.n., Y. Saiki*           | 165,221 | 41.7 | 85,641 | 22,062 | 28,759 | <i>matK</i> |

765 An asterisk (\*) after voucher information indicates that the tissue for Illumina sequencing was obtained from specimen deposited in herbarium.

766 **TABLE 2** Genes in the plastome of *Cibotium* plants from China.

| Function                              | Group of genes                                                                                                                      | Gene names                                                                                                                                                                                                                                                                                                                                                                                                                                                                                                                                                                                                             |
|---------------------------------------|-------------------------------------------------------------------------------------------------------------------------------------|------------------------------------------------------------------------------------------------------------------------------------------------------------------------------------------------------------------------------------------------------------------------------------------------------------------------------------------------------------------------------------------------------------------------------------------------------------------------------------------------------------------------------------------------------------------------------------------------------------------------|
| Protein synthesis and DNA replication | Ribosomal RNAs                                                                                                                      | <i>rrn4.5</i> (×2), <i>rrn5</i> (×2), <i>rrn16</i> (×2), <i>rrn23</i> (×2)                                                                                                                                                                                                                                                                                                                                                                                                                                                                                                                                             |
|                                       | Transfer RNAs                                                                                                                       | <i>trnA-UGC</i> <sup>a</sup> (×2), <i>trnC-GCA</i> , <i>trnD-GUC</i> , <i>trnE-UUC</i> , <i>trnF-GAA</i> , <i>trnG<sup>1</sup>-CAU</i> , <i>trnG-GCC</i> , <i>trnG-UCC</i> <sup>a</sup> , <i>trnH-GUG</i> (×2), <i>trnI-CAU</i> , <i>trnI-GAU</i> <sup>a</sup> (×2), <i>trnL-CAA</i> <sup>a</sup> , <i>trnL-UAG</i> , <i>trnM-CAU</i> , <i>trnN-GUU</i> (×2), <i>trnP-GGG</i> , <i>trnP-UGG</i> , <i>trnQ-UUG</i> , <i>trnR-ACG</i> (×2), <i>trnR-UCG</i> , <i>trnR-UCU</i> , <i>trnS-GCU</i> , <i>trnS-GGA</i> , <i>trnS-UGA</i> , <i>trnT-GGU</i> , <i>trnV-UAC</i> <sup>a</sup> , <i>trnW-CCA</i> , <i>trnY-GUA</i> |
| Photosynthesis                        | Large subunit of ribosome                                                                                                           | <i>rpl2</i> <sup>a</sup> , <i>rpl14</i> , <i>rpl16</i> <sup>a</sup> , <i>rpl20</i> , <i>rpl21</i> , <i>rpl22</i> , <i>rpl23</i> , <i>rpl32</i> , <i>rpl33</i> , <i>rpl36</i>                                                                                                                                                                                                                                                                                                                                                                                                                                           |
|                                       | Small subunit of ribosome                                                                                                           | <i>rps2</i> , <i>rps3</i> , <i>rps4</i> , <i>rps7</i> (×2), <i>rps8</i> , <i>rps11</i> , <i>rps12</i> <sup>a,c</sup> , <i>rps14</i> , <i>rps15</i> , <i>rps16</i> <sup>a</sup> , <i>rps18</i> , <i>rps19</i>                                                                                                                                                                                                                                                                                                                                                                                                           |
|                                       | RNA polymerase                                                                                                                      | <i>rpoA</i> , <i>rpoB</i> , <i>rpoC1</i> <sup>a</sup> , <i>rpoC2</i>                                                                                                                                                                                                                                                                                                                                                                                                                                                                                                                                                   |
|                                       | Photosystem I                                                                                                                       | <i>psaA</i> , <i>psaB</i> , <i>psaC</i> , <i>psaI</i> , <i>psaJ</i> , <i>psaM</i>                                                                                                                                                                                                                                                                                                                                                                                                                                                                                                                                      |
|                                       | Photosystem II                                                                                                                      | <i>psbA</i> (×2), <i>psbB</i> , <i>psbC</i> , <i>psbD</i> , <i>psbE</i> , <i>psbF</i> , <i>psbH</i> , <i>psbI</i> , <i>psbJ</i> , <i>psbK</i> , <i>psbL</i> , <i>psbM</i> , <i>psbN</i> , <i>psbT</i> , <i>psbZ</i>                                                                                                                                                                                                                                                                                                                                                                                                    |
|                                       | NADH-dehydrogenase                                                                                                                  | <i>ndhA</i> <sup>a</sup> , <i>ndhB</i> <sup>a</sup> , <i>ndhC</i> , <i>ndhD</i> , <i>ndhE</i> , <i>ndhF</i> , <i>ndhG</i> , <i>ndhH</i> , <i>ndhI</i> , <i>ndhJ</i> , <i>ndhK</i>                                                                                                                                                                                                                                                                                                                                                                                                                                      |
|                                       | Cytochrome b6/f complex                                                                                                             | <i>petA</i> , <i>petB</i> <sup>a</sup> , <i>petD</i> <sup>a</sup> , <i>petG</i> , <i>petL</i> , <i>petN</i>                                                                                                                                                                                                                                                                                                                                                                                                                                                                                                            |
|                                       | ATP synthase                                                                                                                        | <i>atpA</i> , <i>atpB</i> , <i>atpE</i> , <i>atpF</i> <sup>a</sup> , <i>atpH</i> , <i>atpI</i>                                                                                                                                                                                                                                                                                                                                                                                                                                                                                                                         |
|                                       | Large subunit of rubisco                                                                                                            | <i>rbcL</i>                                                                                                                                                                                                                                                                                                                                                                                                                                                                                                                                                                                                            |
|                                       | Miscellaneous function                                                                                                              | Translation initiation factor<br><i>infA</i><br>Acetyl-CoA carboxylase<br><i>accD</i><br>Cytochrome c biogenesis<br><i>ccsA</i><br>Maturase<br><i>matK</i><br>ATP-dependent protease<br><i>clpP</i> <sup>b</sup><br>Envelope membrane protein<br><i>cemA</i><br>Photochlorophyllide reductase<br><i>chlB</i> , <i>chlL</i> , <i>chlN</i>                                                                                                                                                                                                                                                                               |
| Unknown function                      | Conserved hypothetical open reading frames<br><i>ycf1</i> , <i>ycf2</i> (×2), <i>ycf3</i> <sup>b</sup> , <i>ycf4</i> , <i>ycf12</i> |                                                                                                                                                                                                                                                                                                                                                                                                                                                                                                                                                                                                                        |

767 <sup>a</sup>Gene containing one intron.

768 <sup>b</sup>Gene containing two introns.

769 <sup>c</sup>Trans-spliced gene.

770

771

772



773 **TABLE 3** Characteristics of newly designed and traditional DNA barcodes of  
 774 Chinese *Cibotium* plants.

| DNA barcode       | Product size (bp) | No. of variable sites | No. of parsimony informative sites | PCR primers for new barcodes (5'-3')                     |
|-------------------|-------------------|-----------------------|------------------------------------|----------------------------------------------------------|
| <i>chlB-trnQ</i>  | 714               | 7 (0.98%)             | 4 (0.56%)                          | 1f: TCTTCCCTTTCCGACGTGG<br>1r: CGGTGACATTTGTTGATCGGT     |
| <i>petD-rpoA</i>  | 799               | 4 (0.50%)             | 4 (0.50%)                          | 2f: GCTTGGCCCAATGACCTTT<br>2r: GTTTCGAAAGCTTTATGGGAACG   |
| <i>rps3-rps19</i> | 692               | 5 (0.72%)             | 5 (0.72%)                          | 3f: TCTTCCATCTGTGCGAACCG<br>3r: CAACGGACGGGAGCATCTAC     |
| <i>psaC-ndhG</i>  | 800               | 6 (0.75%)             | 6 (0.75%)                          | 4f: ACTGAATGTGCCATTGAGTCT<br>4r: GGTCTGTTTCGTCATCTCGG    |
| <i>ndhA</i>       | 729               | 3 (0.41%)             | 3 (0.41%)                          | 5f: TGGGCAAAGTCCGTCTTGTC<br>5r: CGGAGATGTATGGTAAGCTTCAGA |
| <i>atpA</i>       | 1506              | 1 (0.07%)             | 1 (0.07%)                          |                                                          |
| <i>atpB</i>       | 1355              | 3 (0.22%)             | 1 (0.07%)                          |                                                          |
| <i>rbcL</i>       | 1136              | 3 (0.26%)             | 0 (0.00%)                          |                                                          |
| <i>rps4</i>       | 554               | 0 (0.00%)             | 0 (0.00%)                          |                                                          |
| <i>rbcL-accD</i>  | 1445              | 4 (0.28%)             | 1 (0.07%)                          |                                                          |
| <i>rbcL-atpB</i>  | 631               | 1 (0.16%)             | 0 (0.00%)                          |                                                          |
| <i>trnG-trnR</i>  | 945               | 5 (0.53%)             | 2 (0.21%)                          |                                                          |
| <i>trnL-trnF</i>  | 947               | 5 (0.53%)             | 4 (0.42%)                          |                                                          |
| <i>rps4-trnS</i>  | 440               | 1 (0.23%)             | 1 (0.23%)                          |                                                          |

775

776

777 **FIGURE LEGENDS**

778 **FIGURE 1** Morphology of *Cibotium* plants from China. **(A)** Dry sliced rhizomes of  
779 *C. barometz*, “Gouji”. **(B)** Rhizome, stipes and young fronds of *C. barometz* covered  
780 with golden filiform hairs. **(C)** Rhizomes of *C. barometz* sold as medicinal herbs at a  
781 village fair. **(D)** Fronds of *C. barometz*. **(E)** Veins, hairs and unopened sori on abaxial  
782 surface of pinnae of *C. borometz*. **(F)** Opened sori of *C. borometz*. **(G-H)** Cross  
783 section and basal part of stipe of *C. barometz*. **(I-J)** Basal part of pinna in *C. barometz*  
784 and *C. cumingii* showing the difference of basal pinnules on the basiscopic side.  
785 Photographs by R.-H. Jiang (A–B & D & F), X.-C. Zhang (C & I–J), and Q.-K. Ding  
786 (E & G–H).

787

788 **FIGURE 2** Map showing the distribution of *Cibotium* samples in this study. Yellow,  
789 blue and red dots represent localities of *C. barometz*, *C. sino-burmaense*, and *C.*  
790 *cumingii*, respectively. Code of each sampling locality means the same as Table 1.

791

792 **FIGURE 3** Plastome map of *Cibotium sino-burmaense*. Arrows indicate the direction  
793 of gene transcription. The dark grey area of the inner circle shows GC content  
794 variation among different region of the plastome.

795

796 **FIGURE 4** Sequence identity plot comparing plastome sequence and constitution of  
797 three Chinese *Cibotium* species with *C. barometz* as a reference. Each sequence starts  
798 with the beginning of LSC and end at the end of SSC. Gray arrows indicate genes  
799 with their orientation. A cut-off of 50% identity was used for the plot, and the Y-axis  
800 represents the percent identity ranging from 50% to 100%.

801

802 **FIGURE 5** Maximum likelihood cladogram of the *Cibotium* plant from China and  
803 adjacent regions inferred from 85 concatenated protein-coding genes. Numbers above  
804 branches are bootstrap values (MLBS) and posterior probabilities (BIPP). Asterisk (\*)  
805 indicates MLBS = 100% or BIPP = 1.0. En-dashe (–) indicates the lack of support  
806 value. The corresponding phylogram showing branch length is placed at the upper left

807 corner.

808

809 **FIGURE 6** Sliding window analysis of 19 plastomes of *Cibotium barometz* (window  
810 length: 800 bp, step size: 200 bp). X and Y axes indicate the position of the midpoint  
811 of a window and nucleotide variability ( $\pi$ ) of each window, respectively. Those  
812 marked fragments show the position of five newly designed DNA barcodes for inter-  
813 and intra-species discrimination in Chinese *Cibotium*.

814

815 **FIGURE 7** Habitat and morphology of *Cibotium sino-burmaense* sp. nov. from  
816 Dulongjiang, Gongshan, Yunnan, China. **(A-B)** Habitat. **(C)** Habit. **(D)** Pinnae on  
817 abaxial side. **(E)** Pinnules on adaxial surface. **(F)** Pinnules with opened sori. **(G-H)**  
818 Spores under light microscopy. **(I)** Golden filiform hairs on stipe base. Photographs  
819 by, X.-C. Zhang (A–F & I), and S.-Q. Liang (G–H).



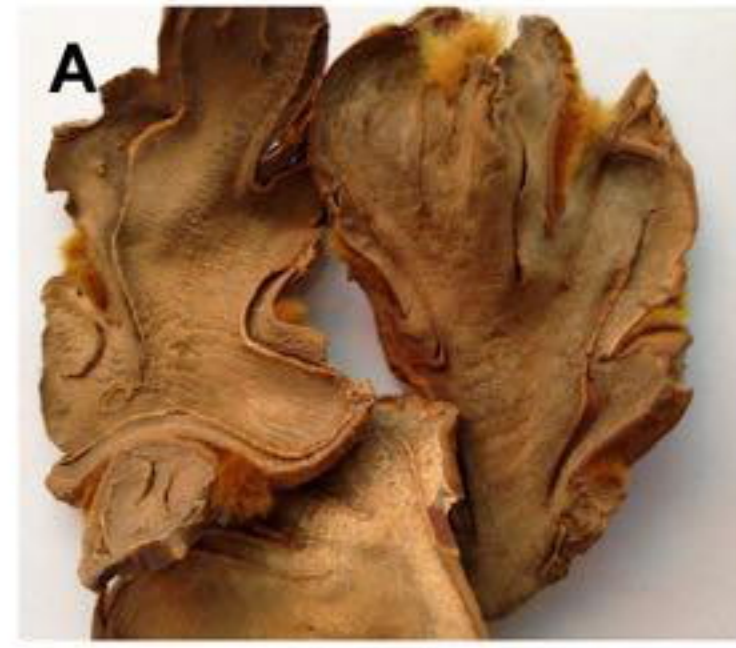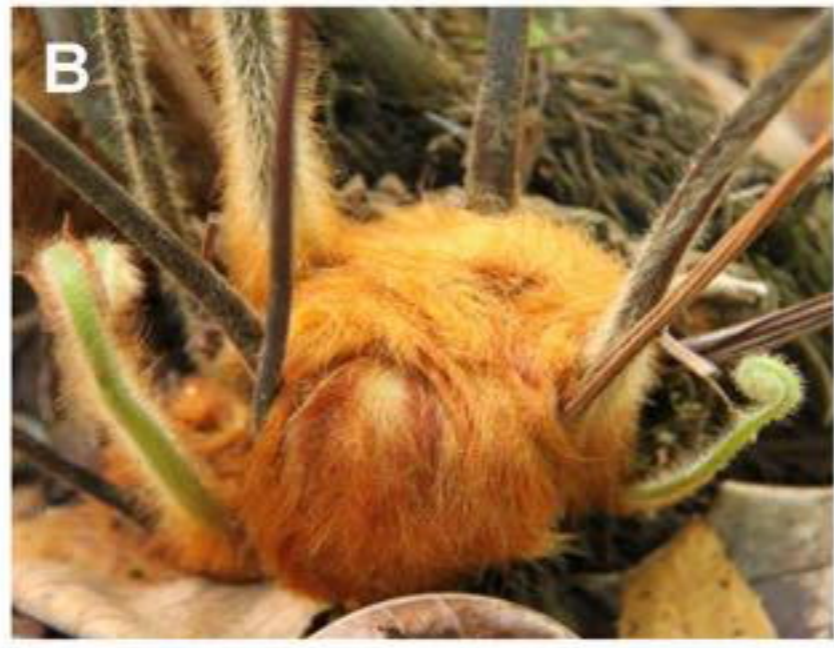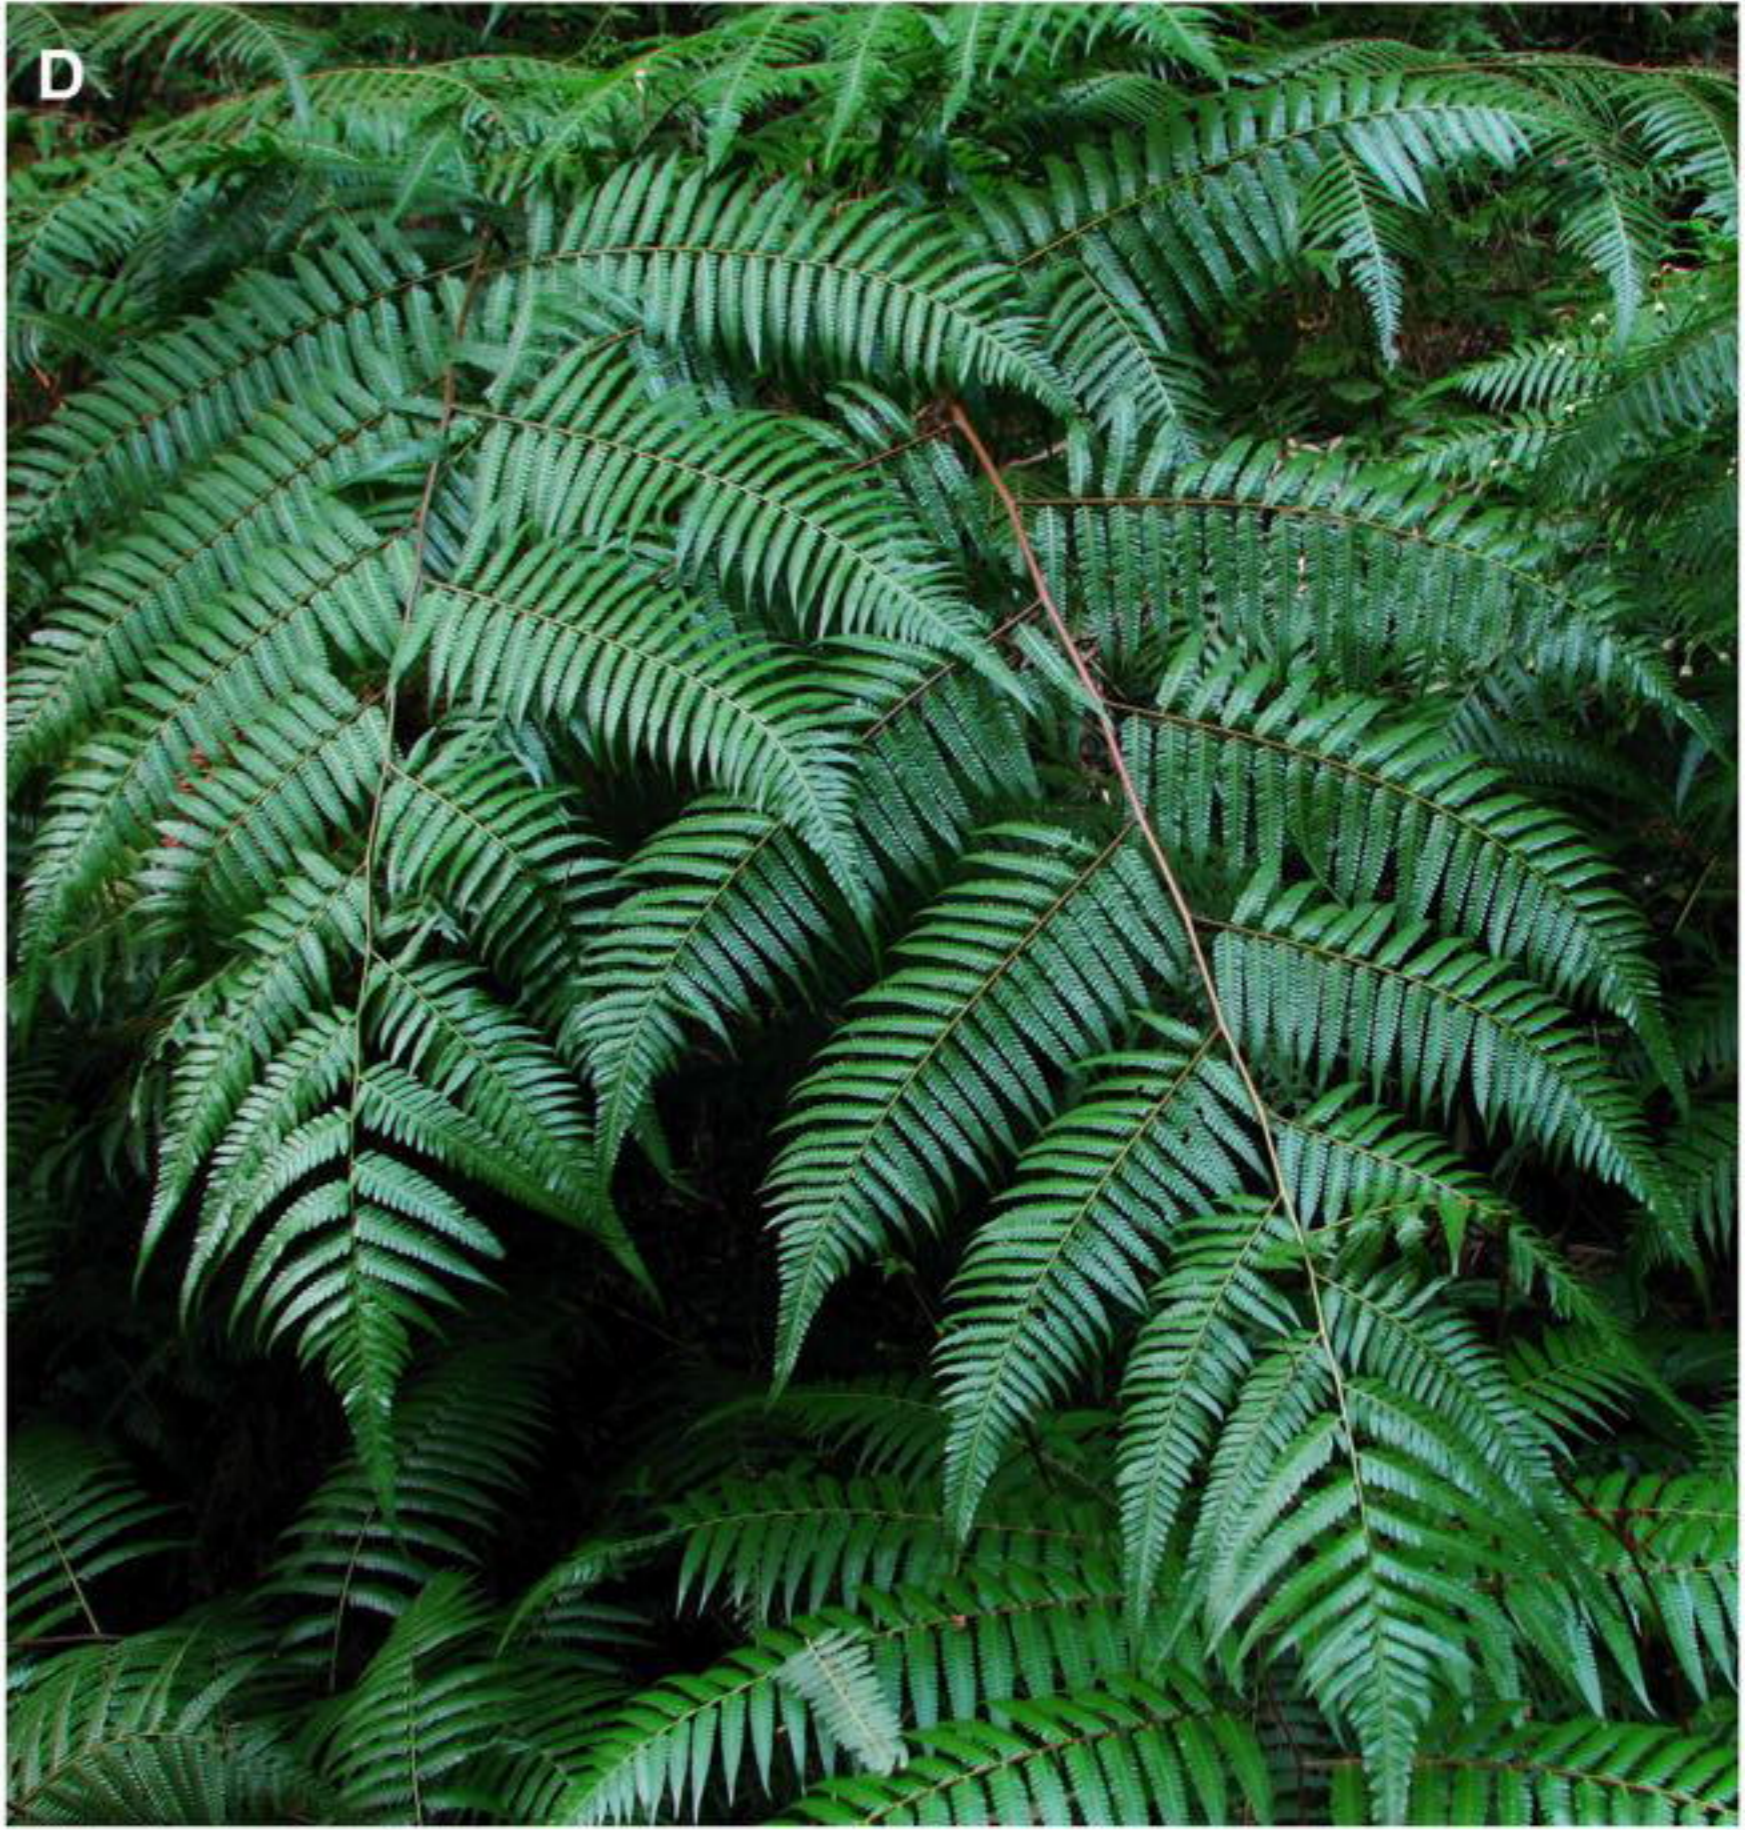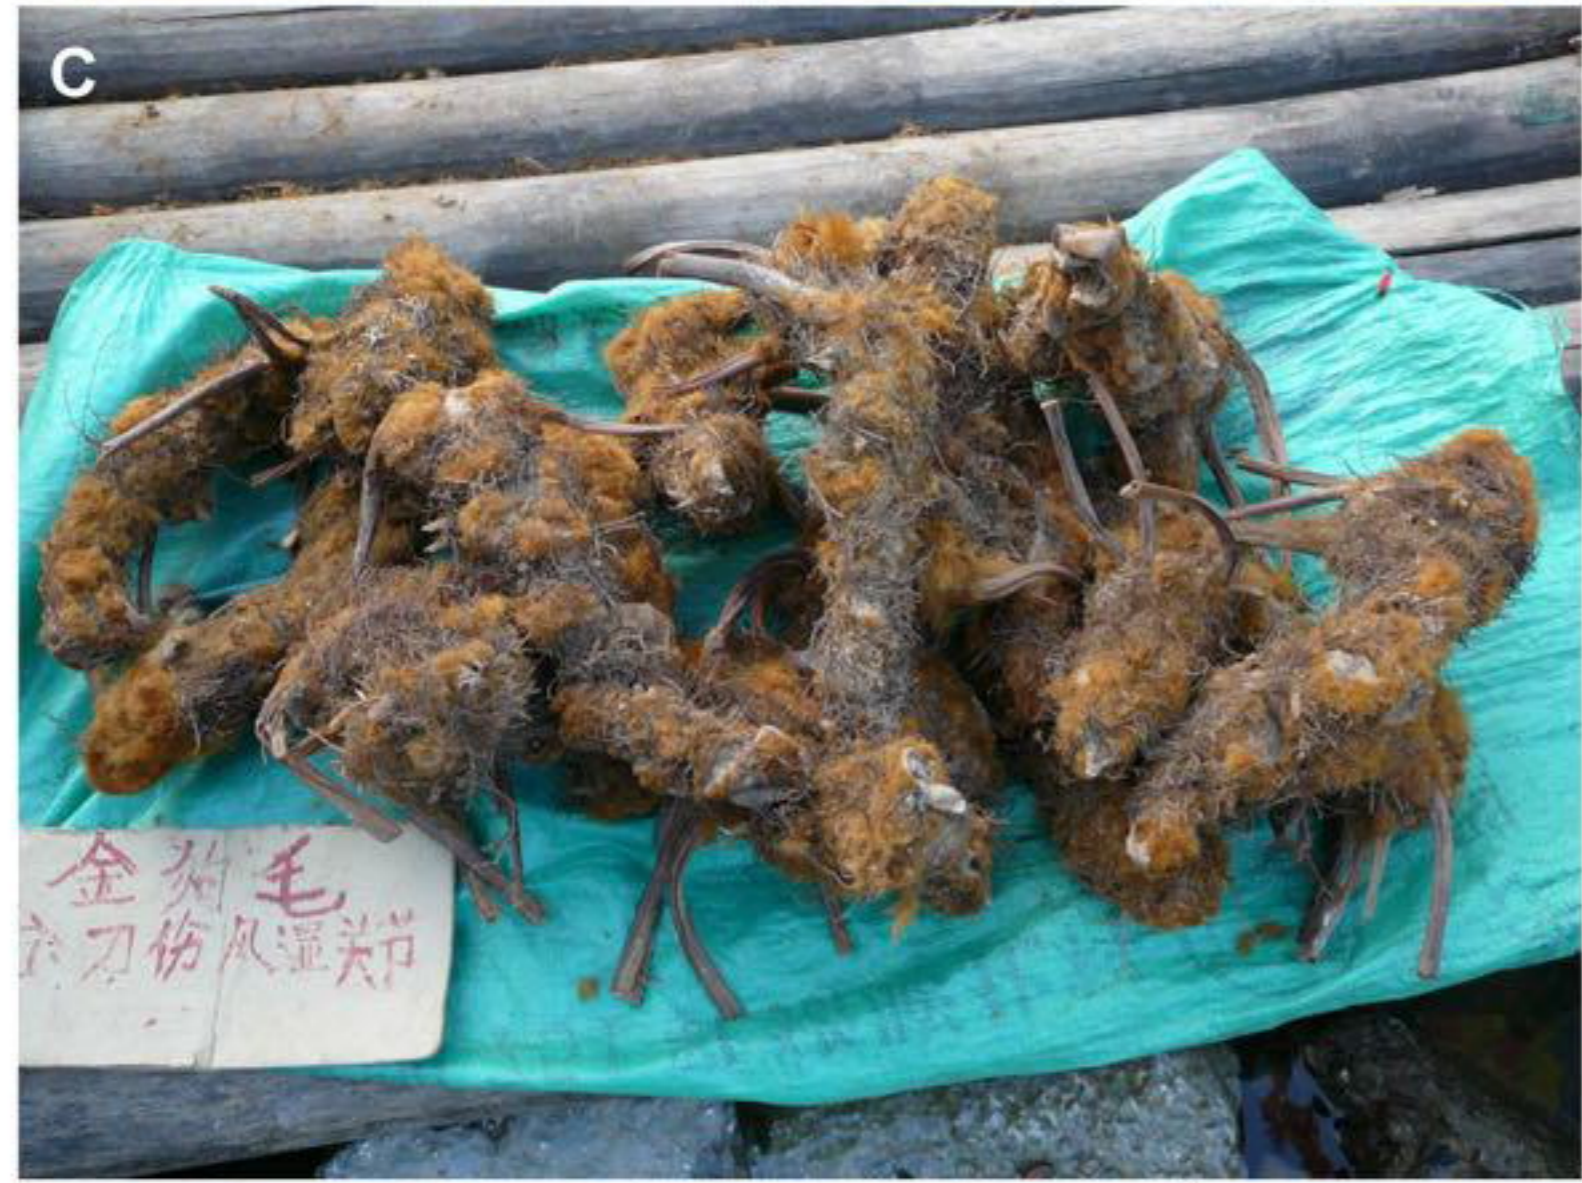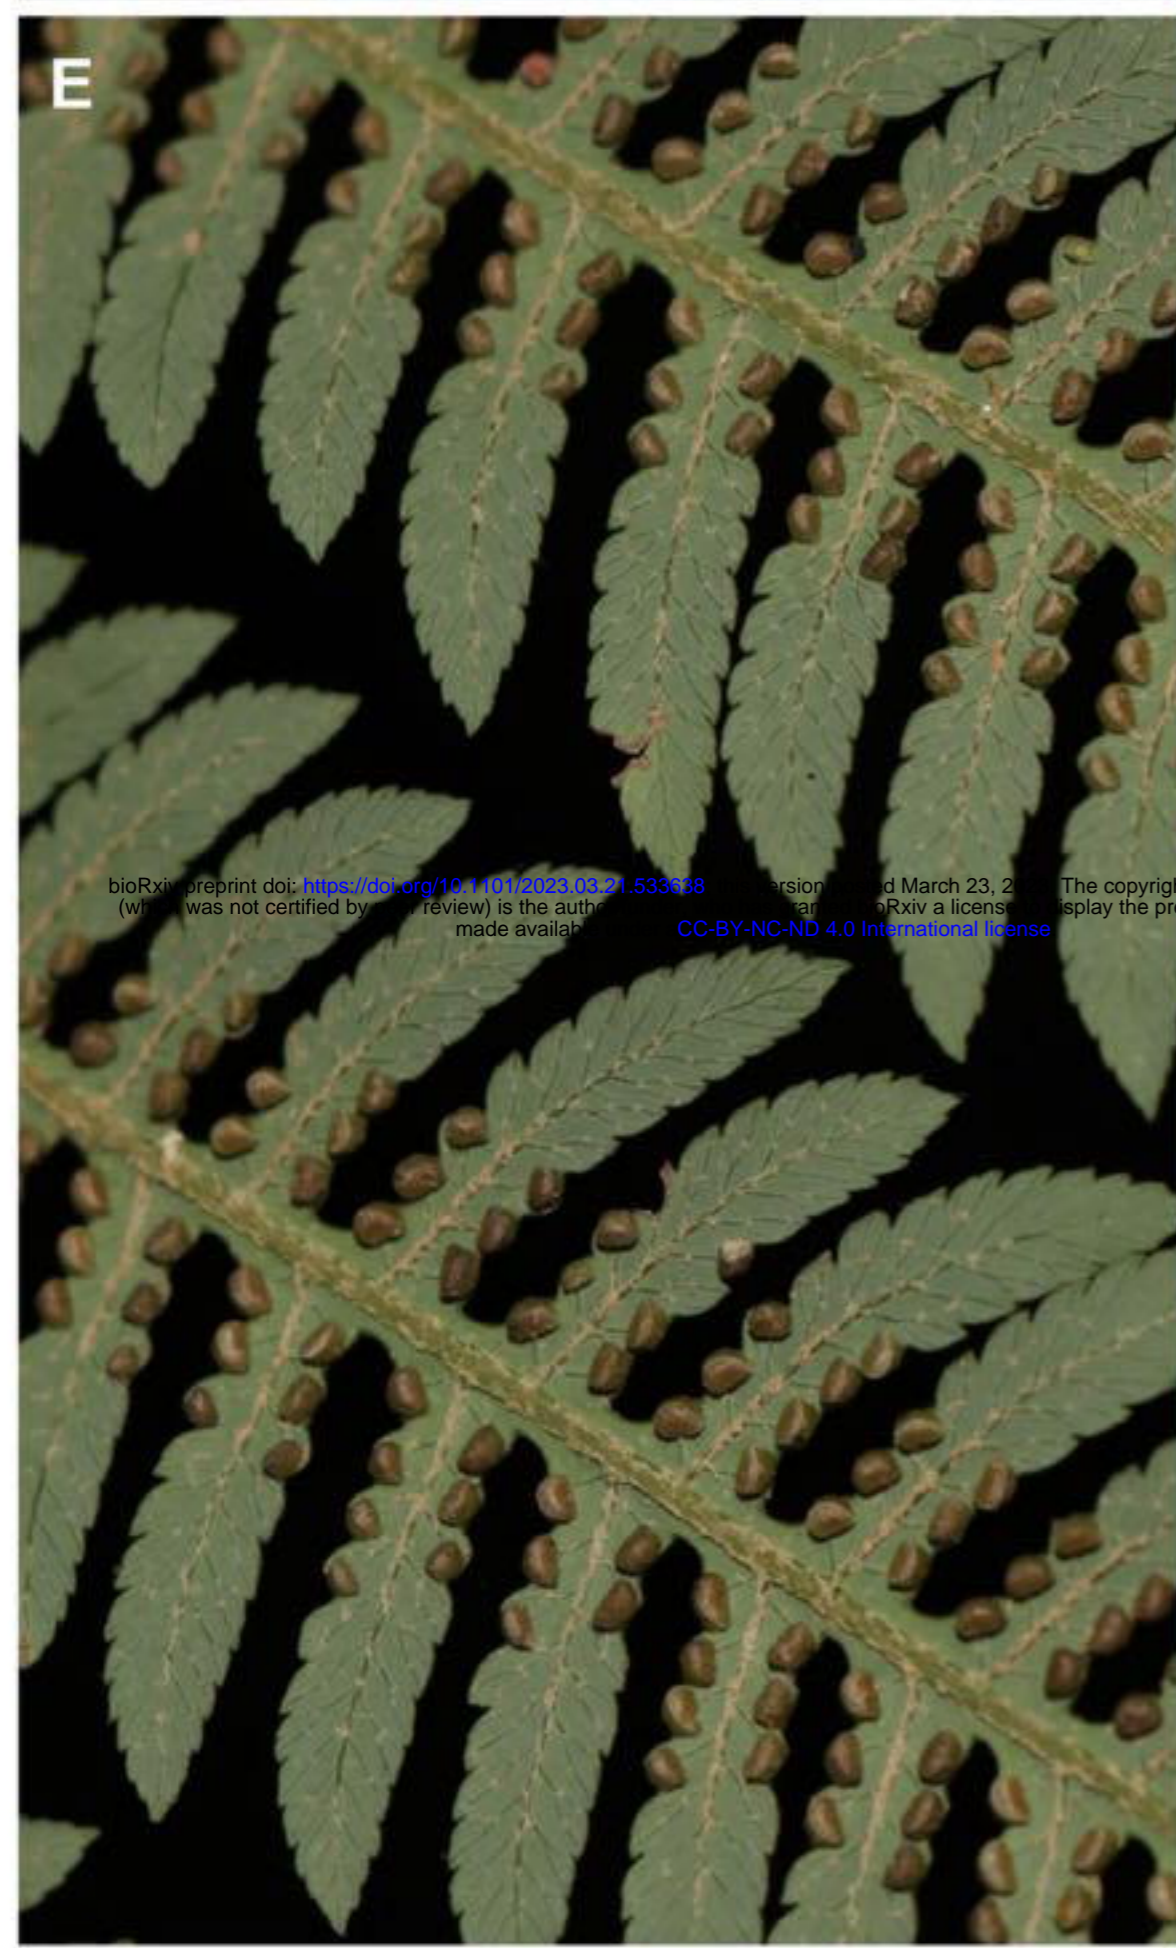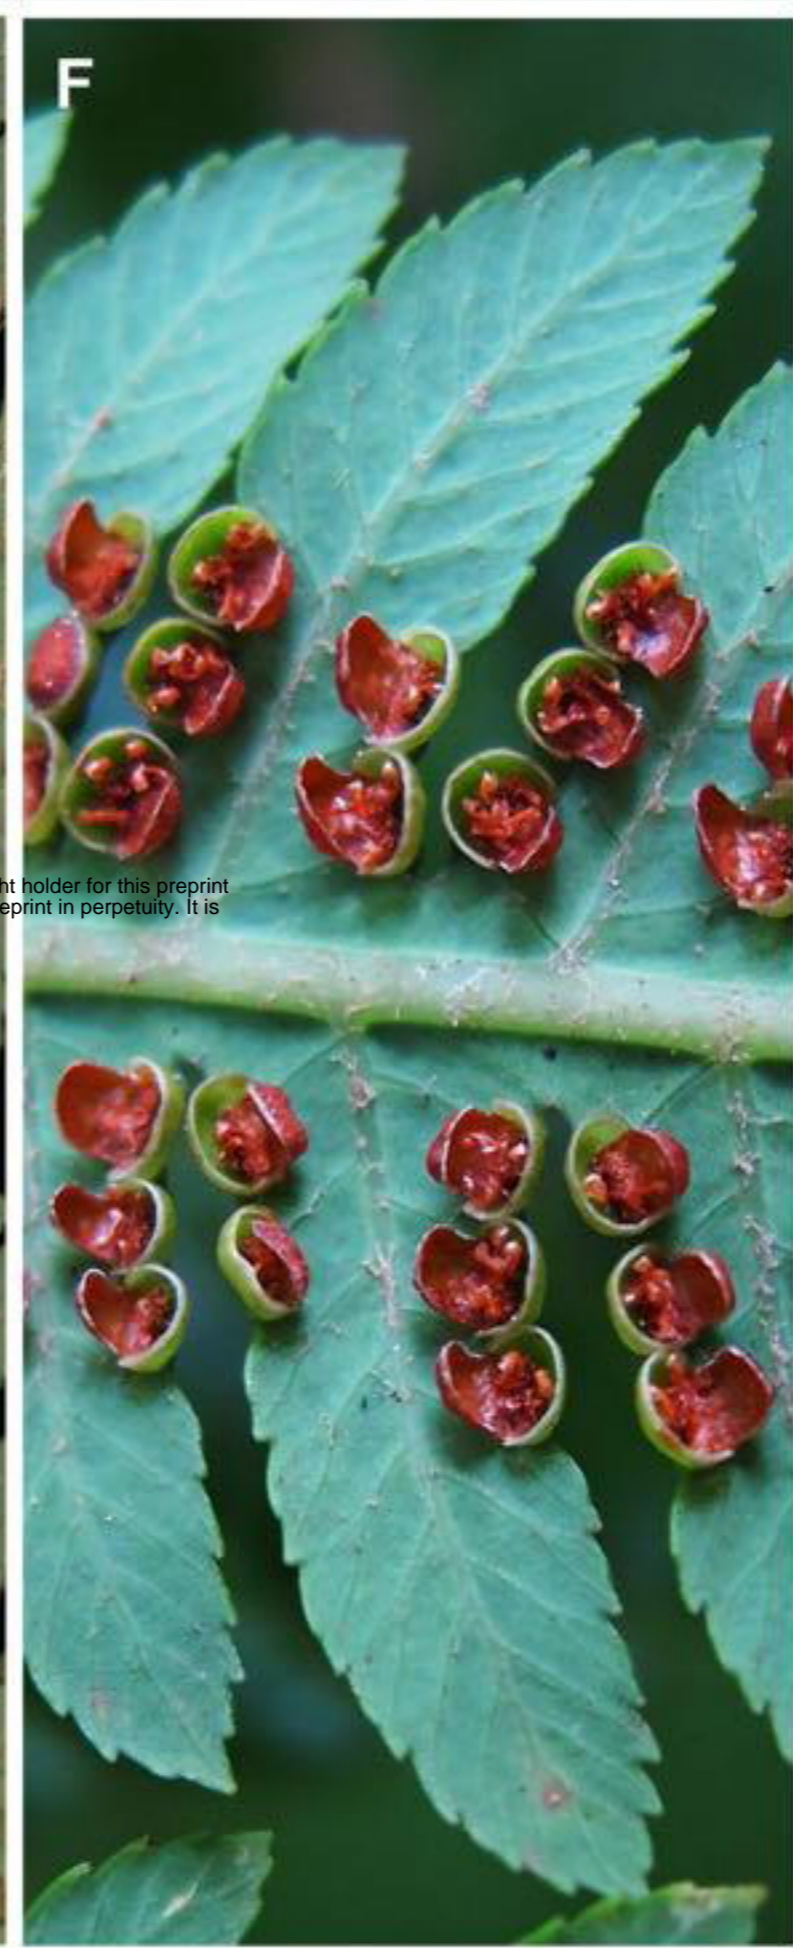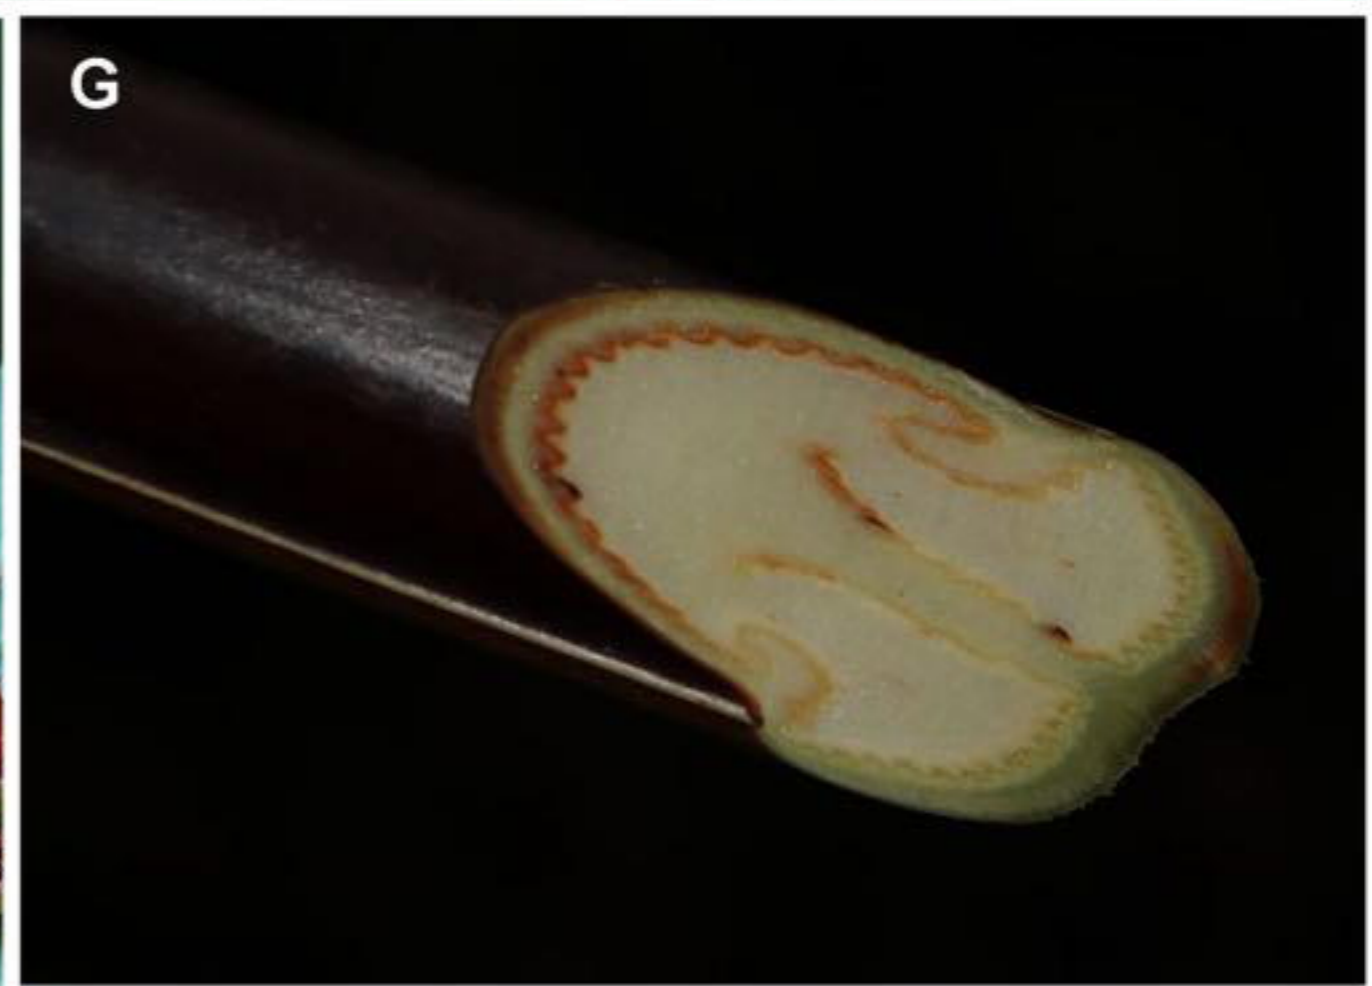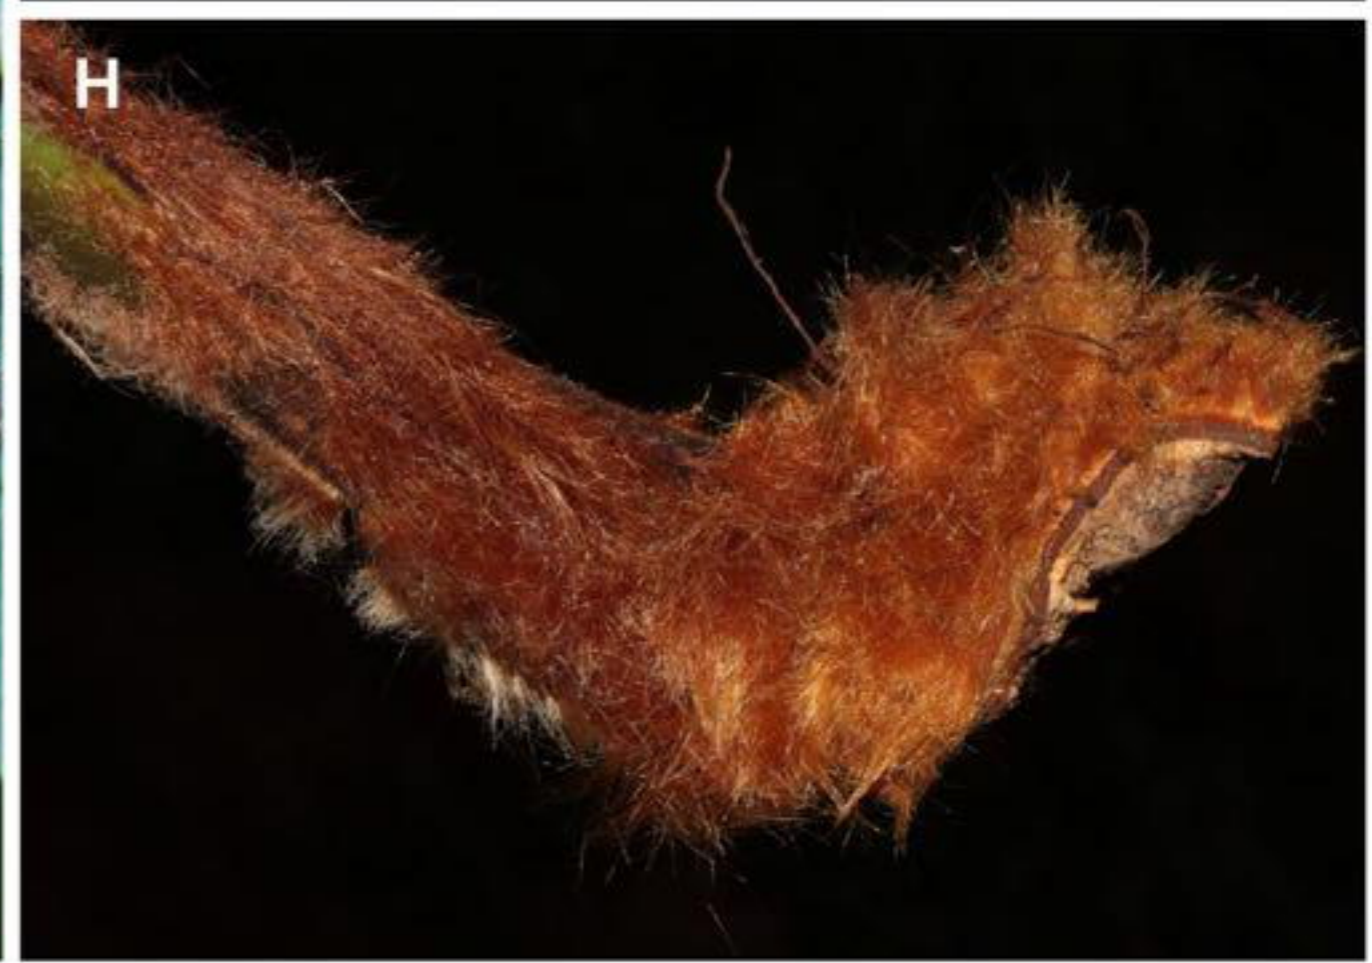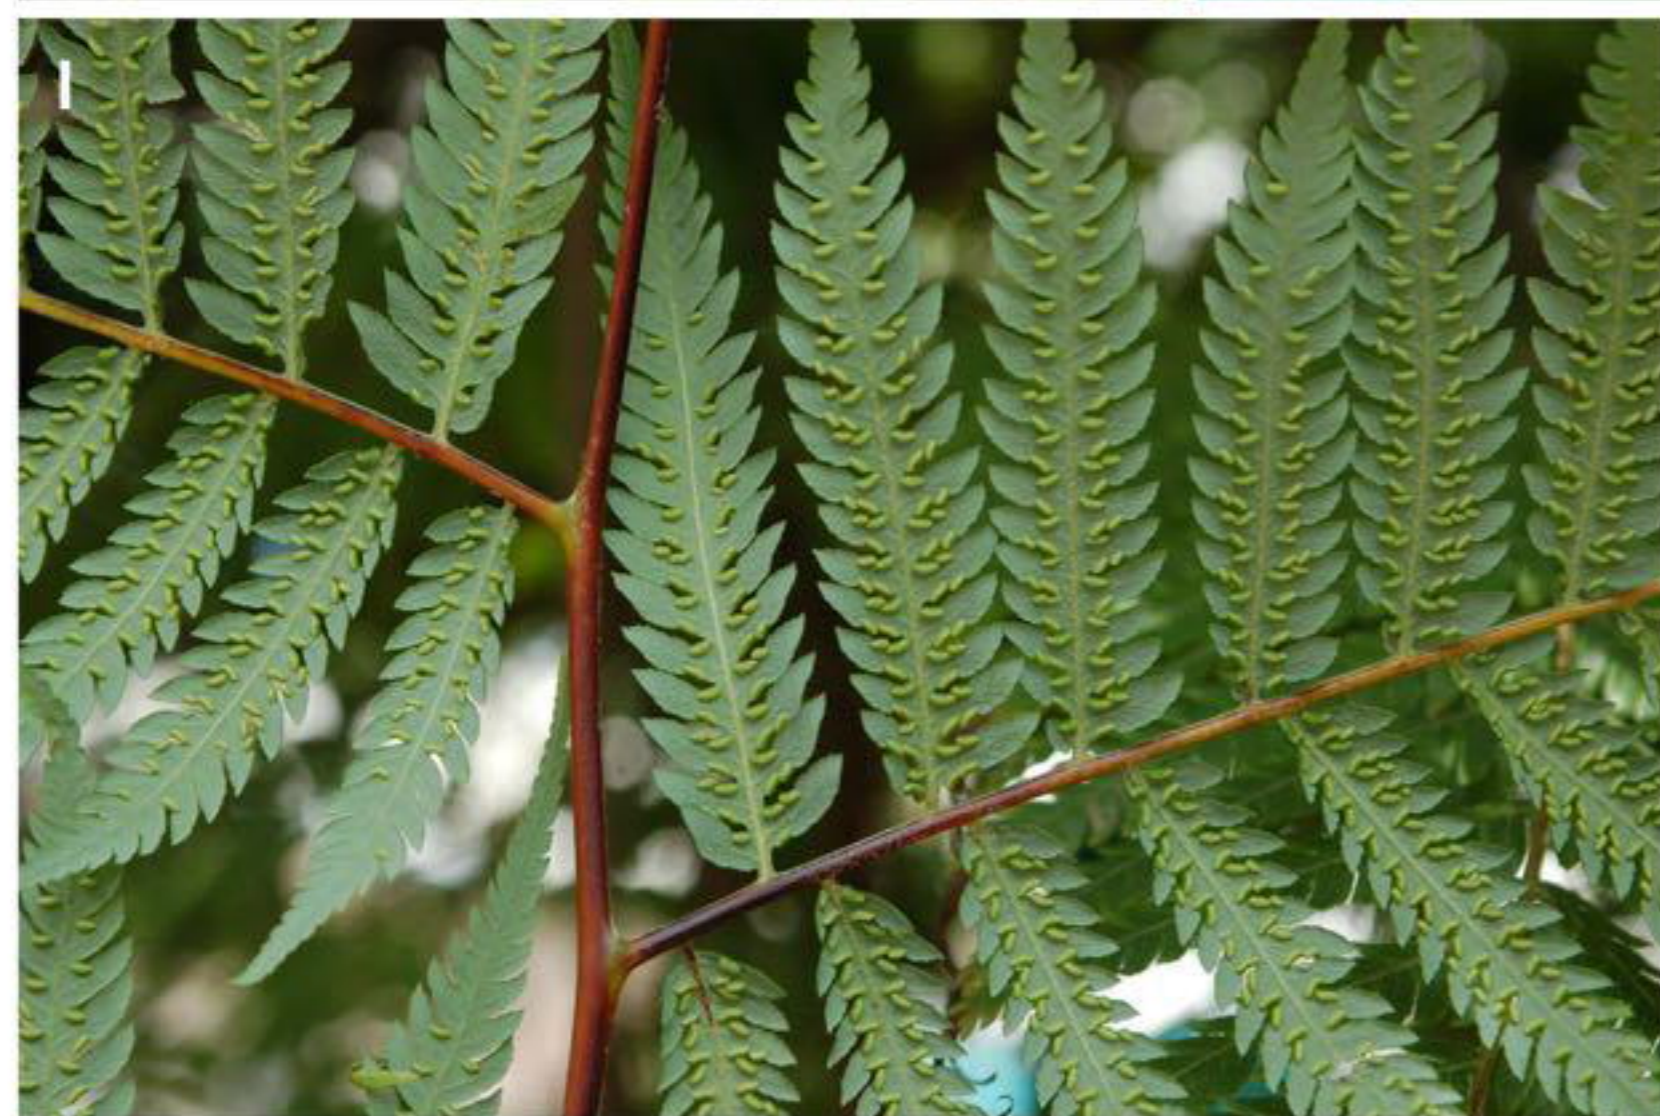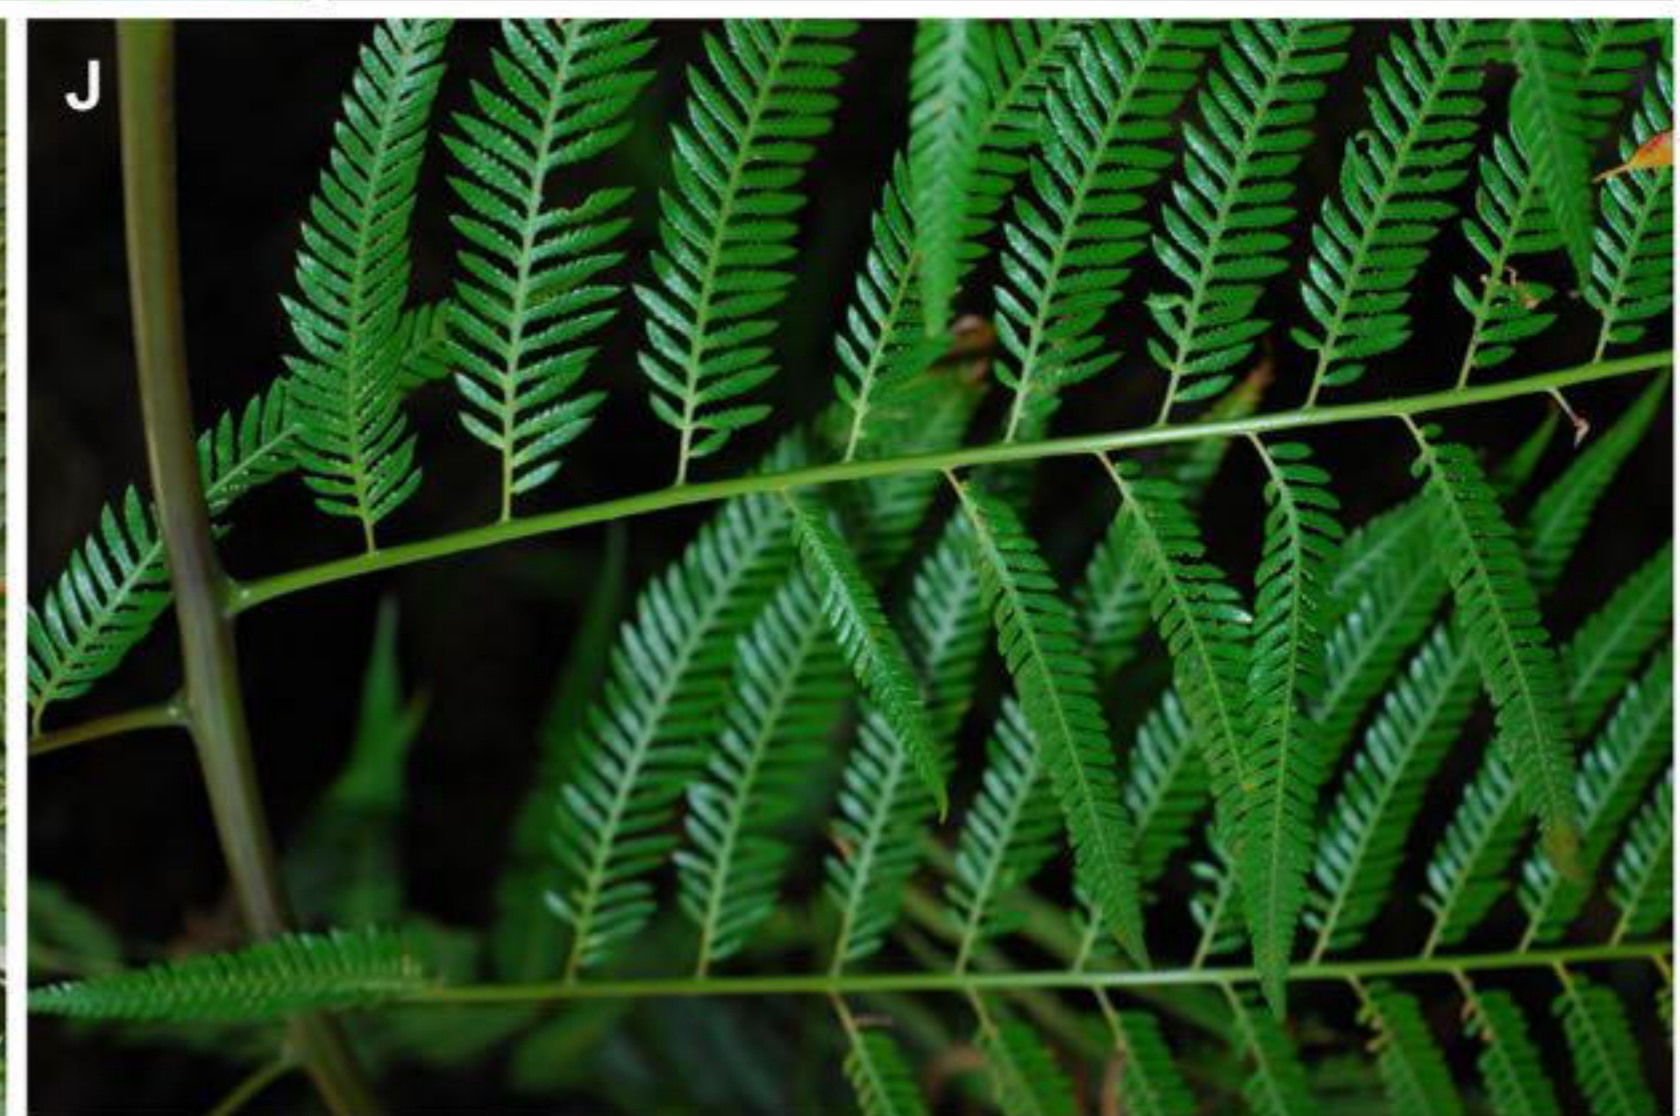

bioRxiv preprint doi: <https://doi.org/10.1101/2023.03.21.533638>; this version posted March 23, 2023. The copyright holder for this preprint (which was not certified by peer review) is the author/funder, who has granted bioRxiv a license to display the preprint in perpetuity. It is made available under aCC-BY-NC-ND 4.0 International license.



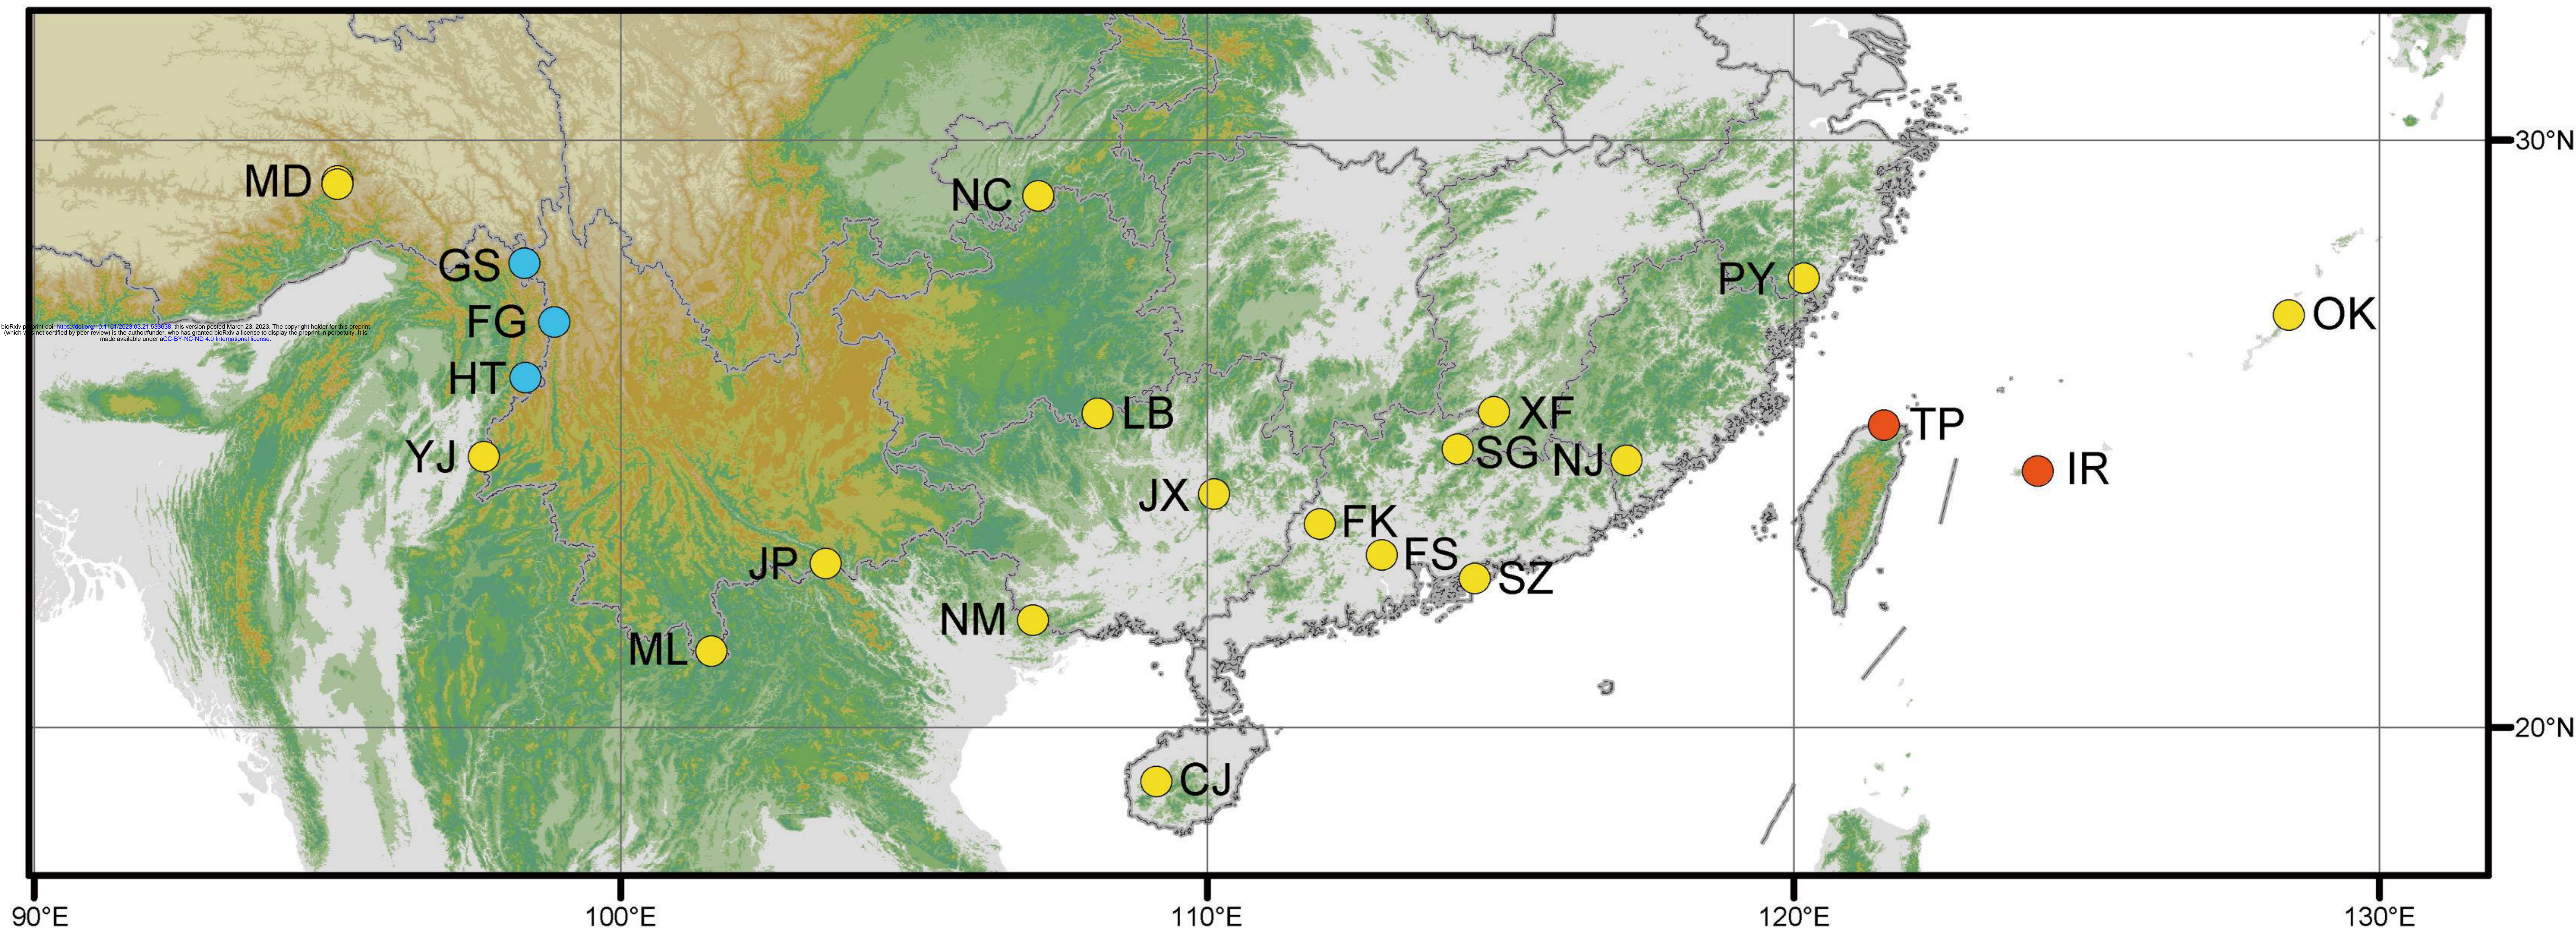

bioRxiv preprint doi: <https://doi.org/10.1101/2023.03.21.530638>; this version posted March 23, 2023. The copyright holder for this preprint (which was not certified by peer review) is the author/funder, who has granted bioRxiv a license to display the preprint in perpetuity. It is made available under aCC-BY-NC-ND 4.0 International license.



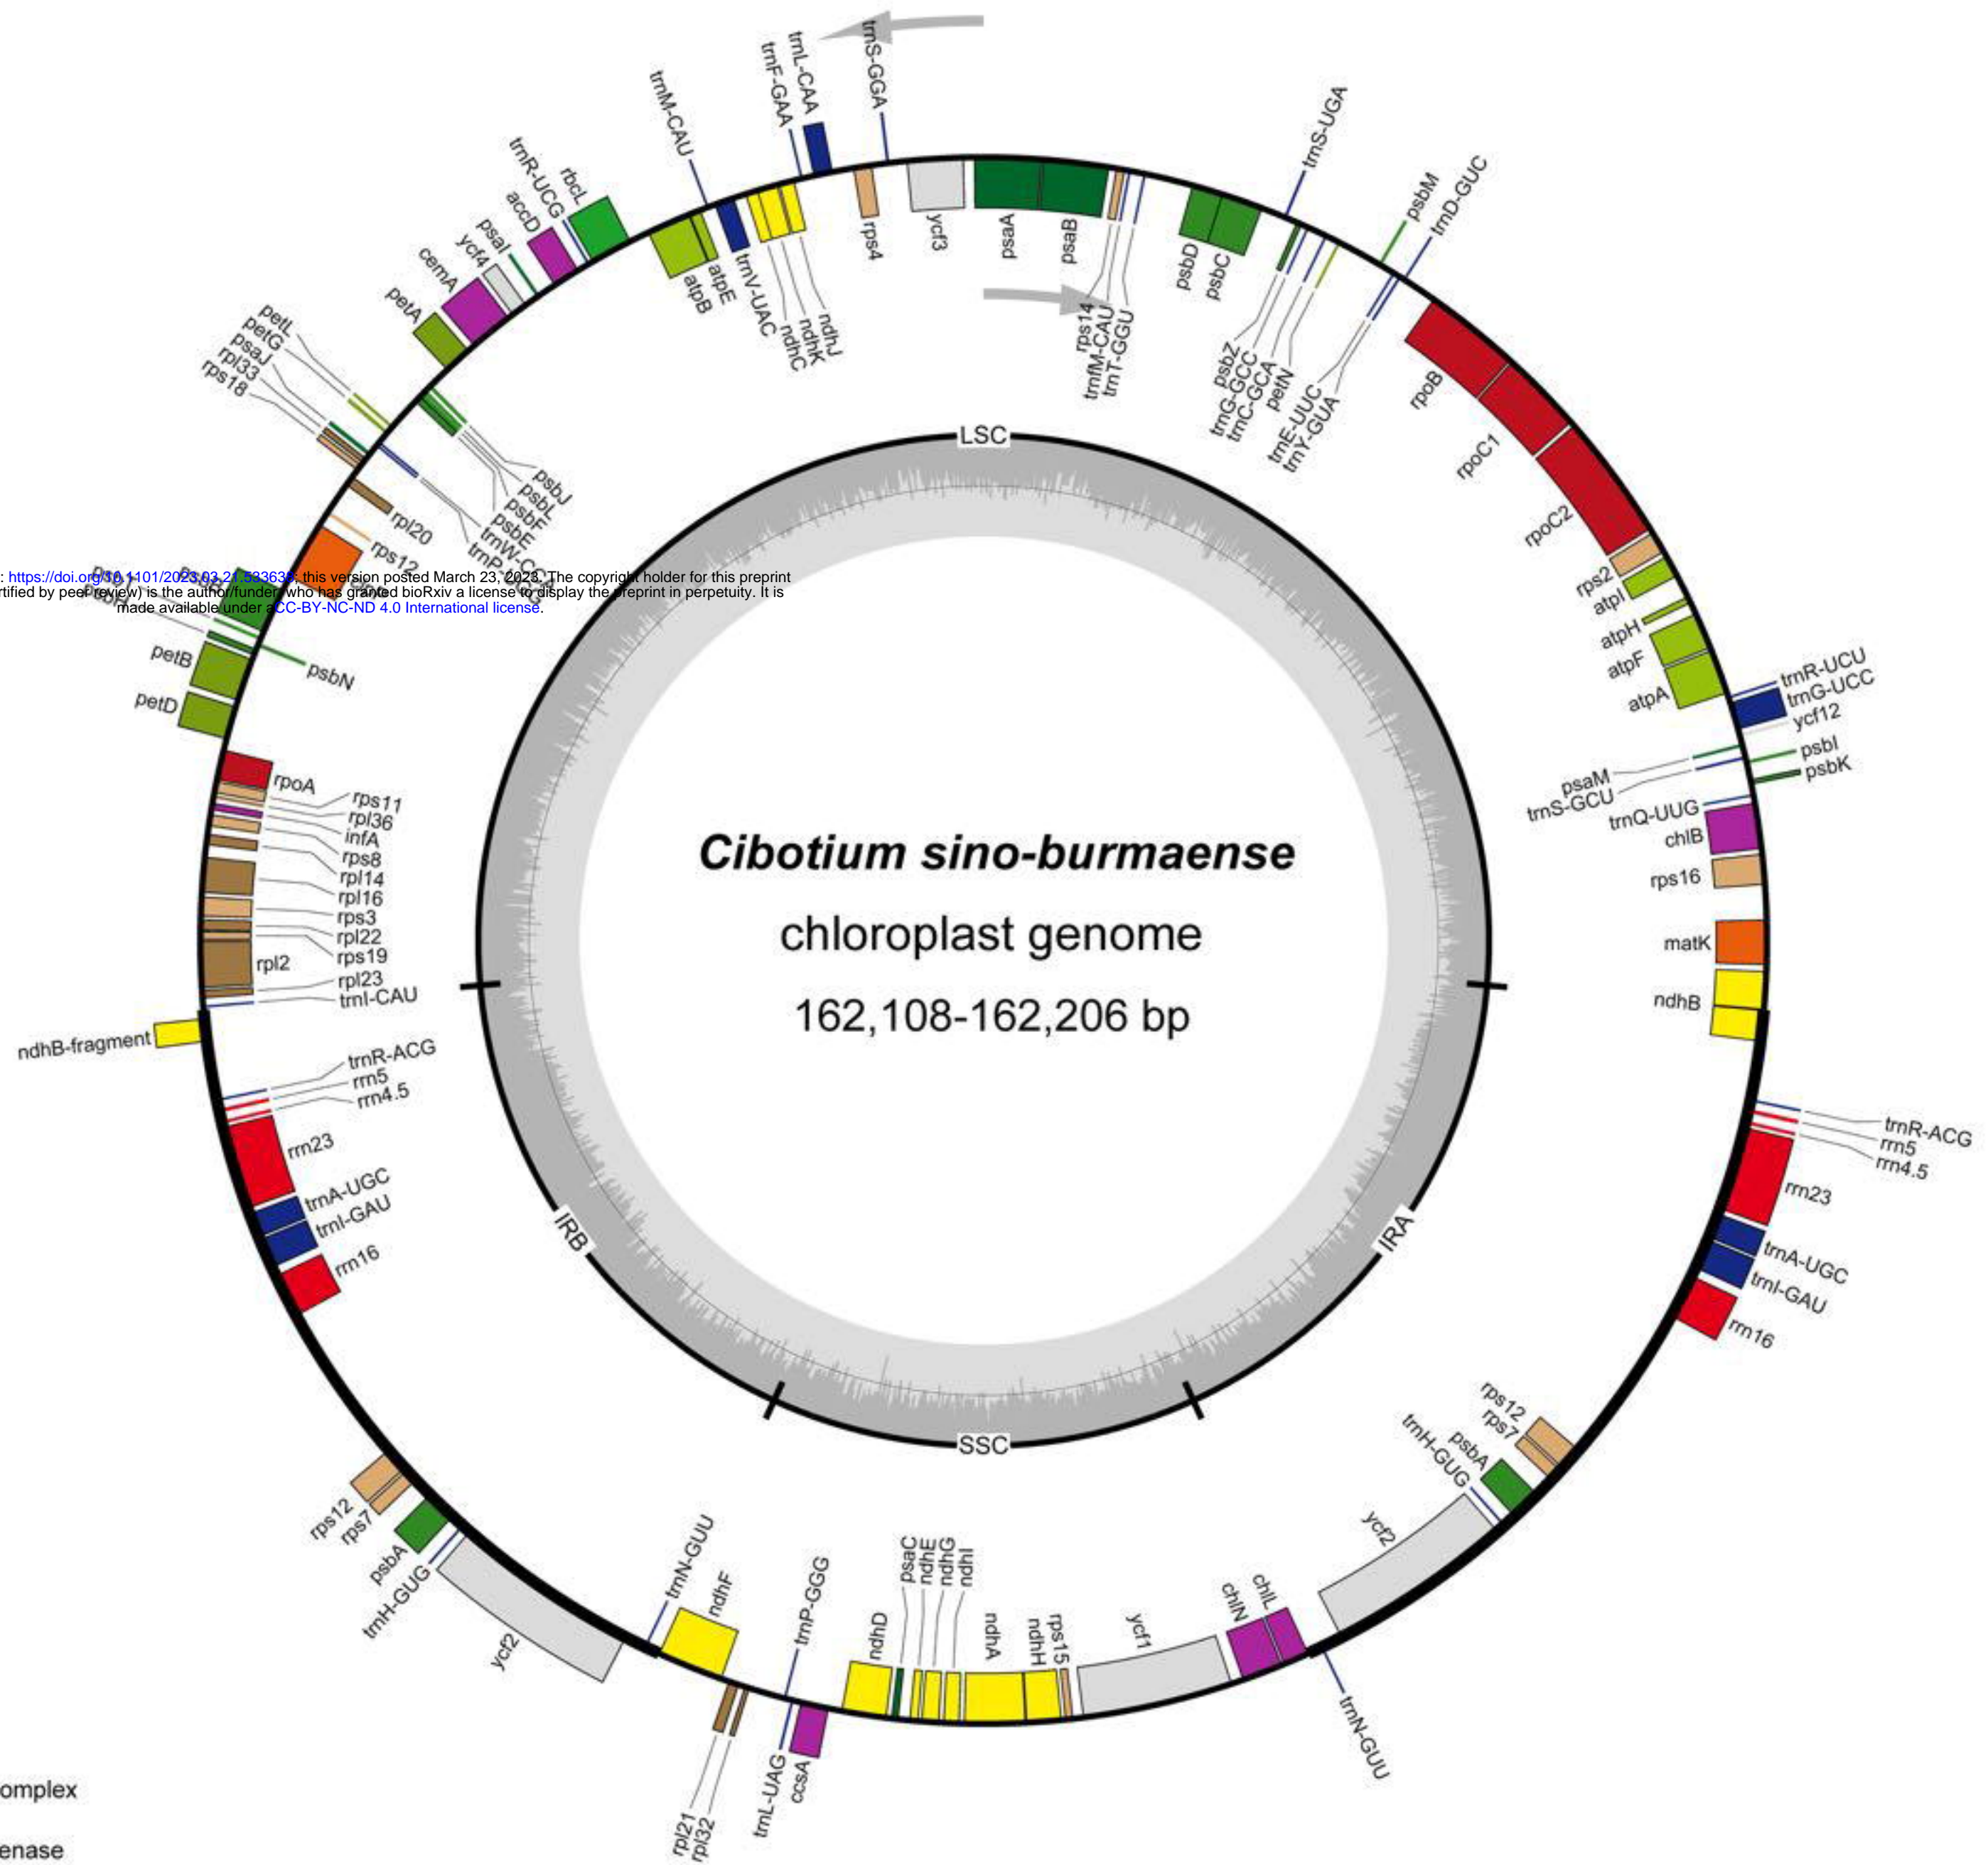

- photosystem I
- photosystem II
- cytochrome b/f complex
- ATP synthase
- NADH dehydrogenase
- RubisCO large subunit
- RNA polymerase
- ribosomal proteins (SSU)
- ribosomal proteins (LSU)
- transfer RNAs
- ribosomal RNAs
- clpP, matK
- other genes
- hypothetical chloroplast reading frames (ycf)



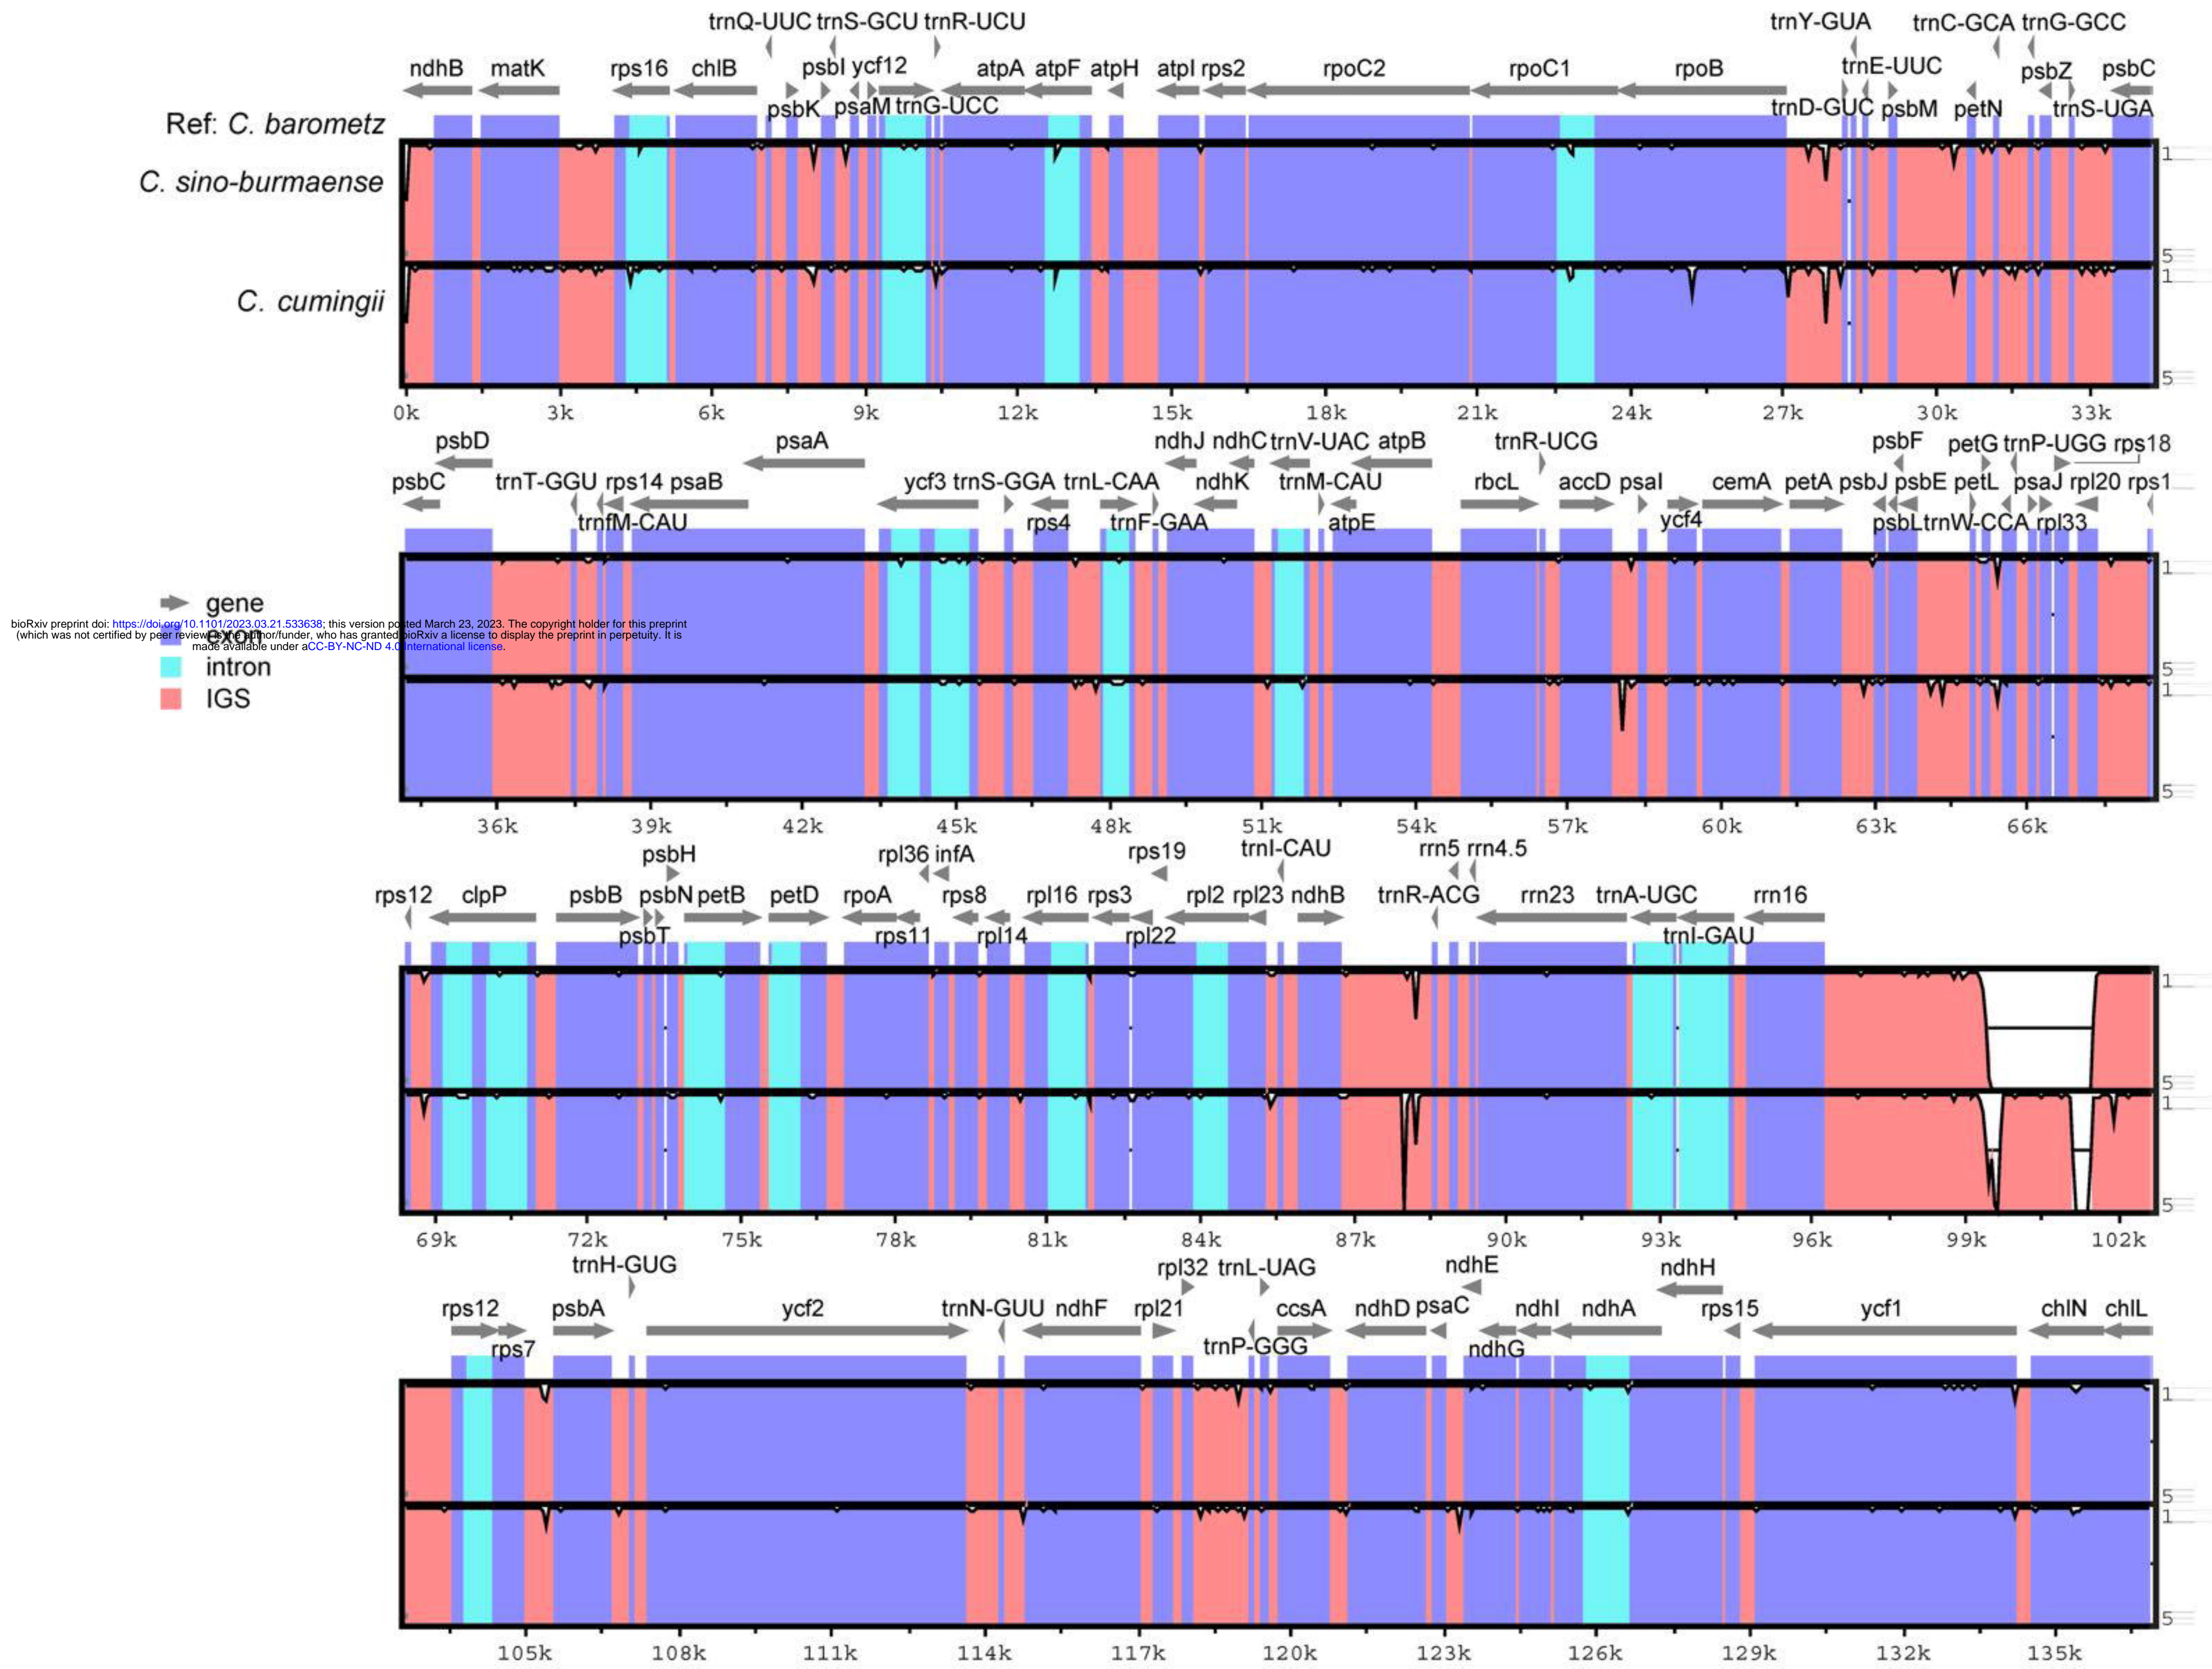



*Cibotium*

0.008

bioRxiv preprint doi: <https://doi.org/10.1101/2023.03.21.533638>; this version posted March 23, 2023. The copyright holder for this preprint (which was not certified by peer review) is the author/funder, who has granted bioRxiv a license to display the preprint in perpetuity. It is made available under aCC-BY-NC-ND 4.0 International license.

Subclade

Subclade

Clade

*C. barometz* LB Guizhou

*C. barometz* OK JAPAN

*C. barometz* SZ Guangdong

*C. barometz* FK Guangdong

*C. barometz* XF Jiangxi

*C. barometz* FS Guangdong

*C. barometz* PY Zhejiang

*C. barometz* NC037893

*C. barometz* NJ Fujian

*C. barometz* SG Guangdong

*C. barometz* CJ Hainan Island

*C. barometz* JP1 Yunnan

*C. barometz* NC Chongqing

*C. barometz* YJ Yunnan

*C. barometz* ML Yunnan

*C. barometz* JX Guangxi

*C. barometz* NM Guangxi

*C. barometz* MD1 Xizang

*C. barometz* MD2 Xizang

*C. sino-burmaense* FG1 Yunnan

*C. sino-burmaense* FG2 Yunnan

*C. sino-burmaense* GS1 Yunnan

*C. sino-burmaense* GS2 Yunnan

*C. sino-burmaense* HT MYANMAR

*C. cumingii* TP Taiwan Island

*C. cumingii* IR JAPAN

*Alsophila spinulosa* NC012818

*Sphaeropteris brunoniana* NC051561

*Plagiogyria euphlebia* NC046784

94/\*

38/-

43/-

95/\*

96/\*

83/-

90/\*

88/\*

85/\*

75/-

\*/\*

81/\*

92/\*

89/\*

61/0.58

86/-

89/-

64/-

\*/\*

\*/\*

90/\*

85/\*

89/\*

\*/\*

\*/\*

\*/\*

0.01

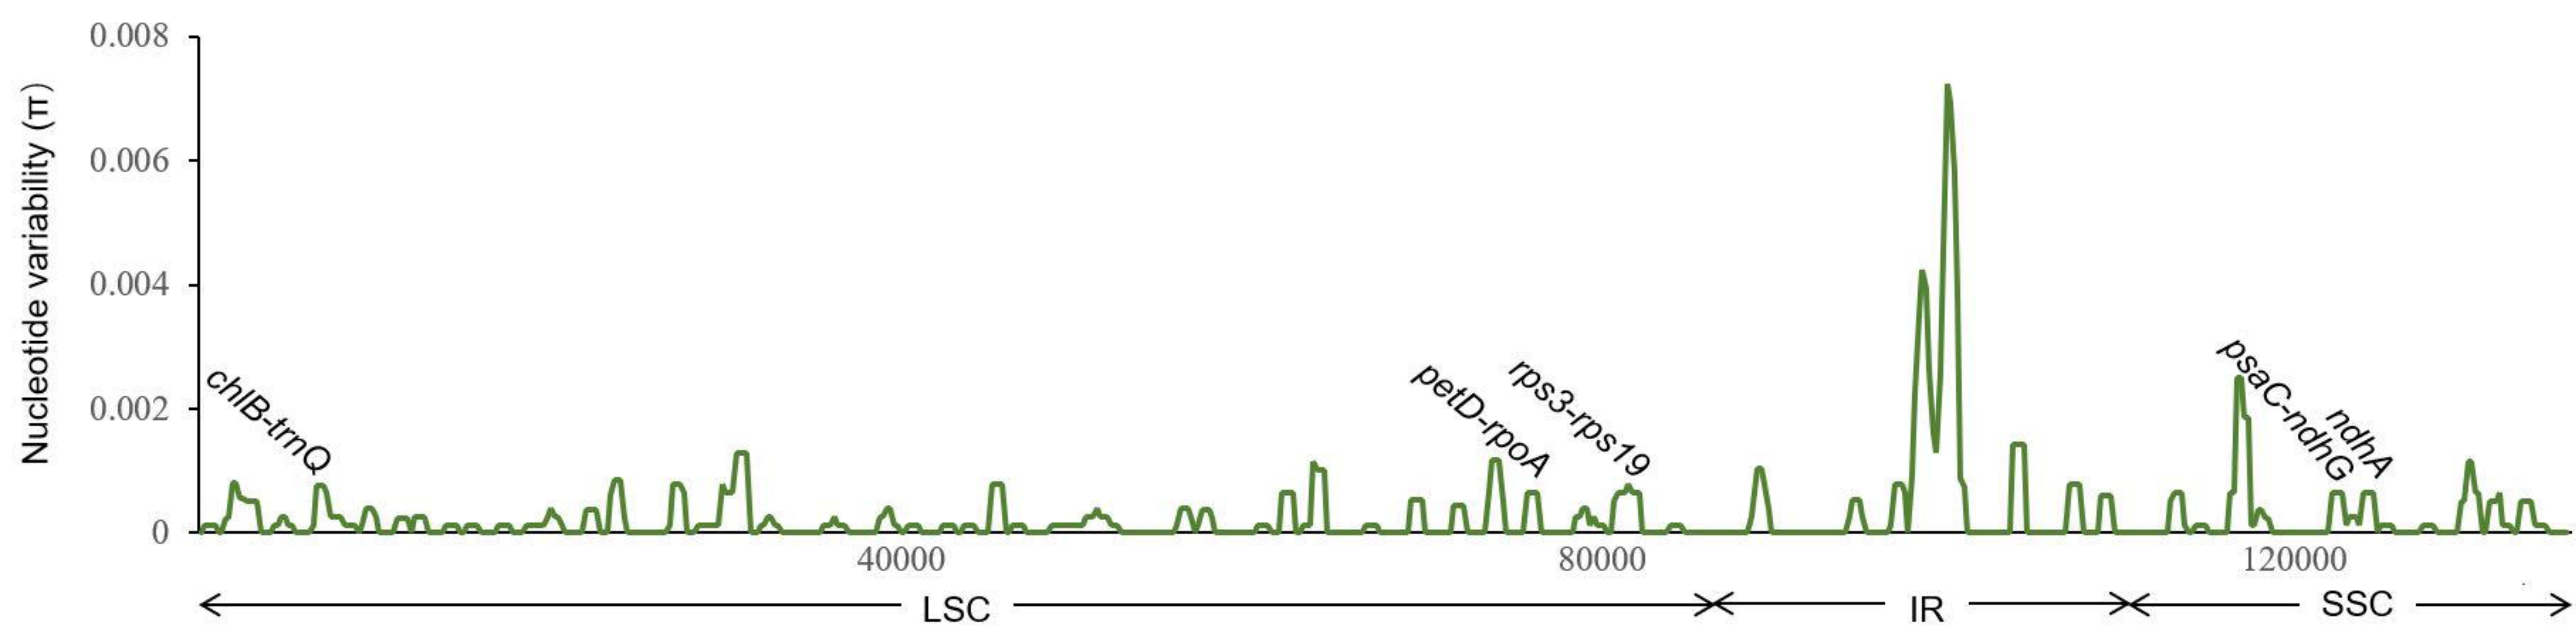



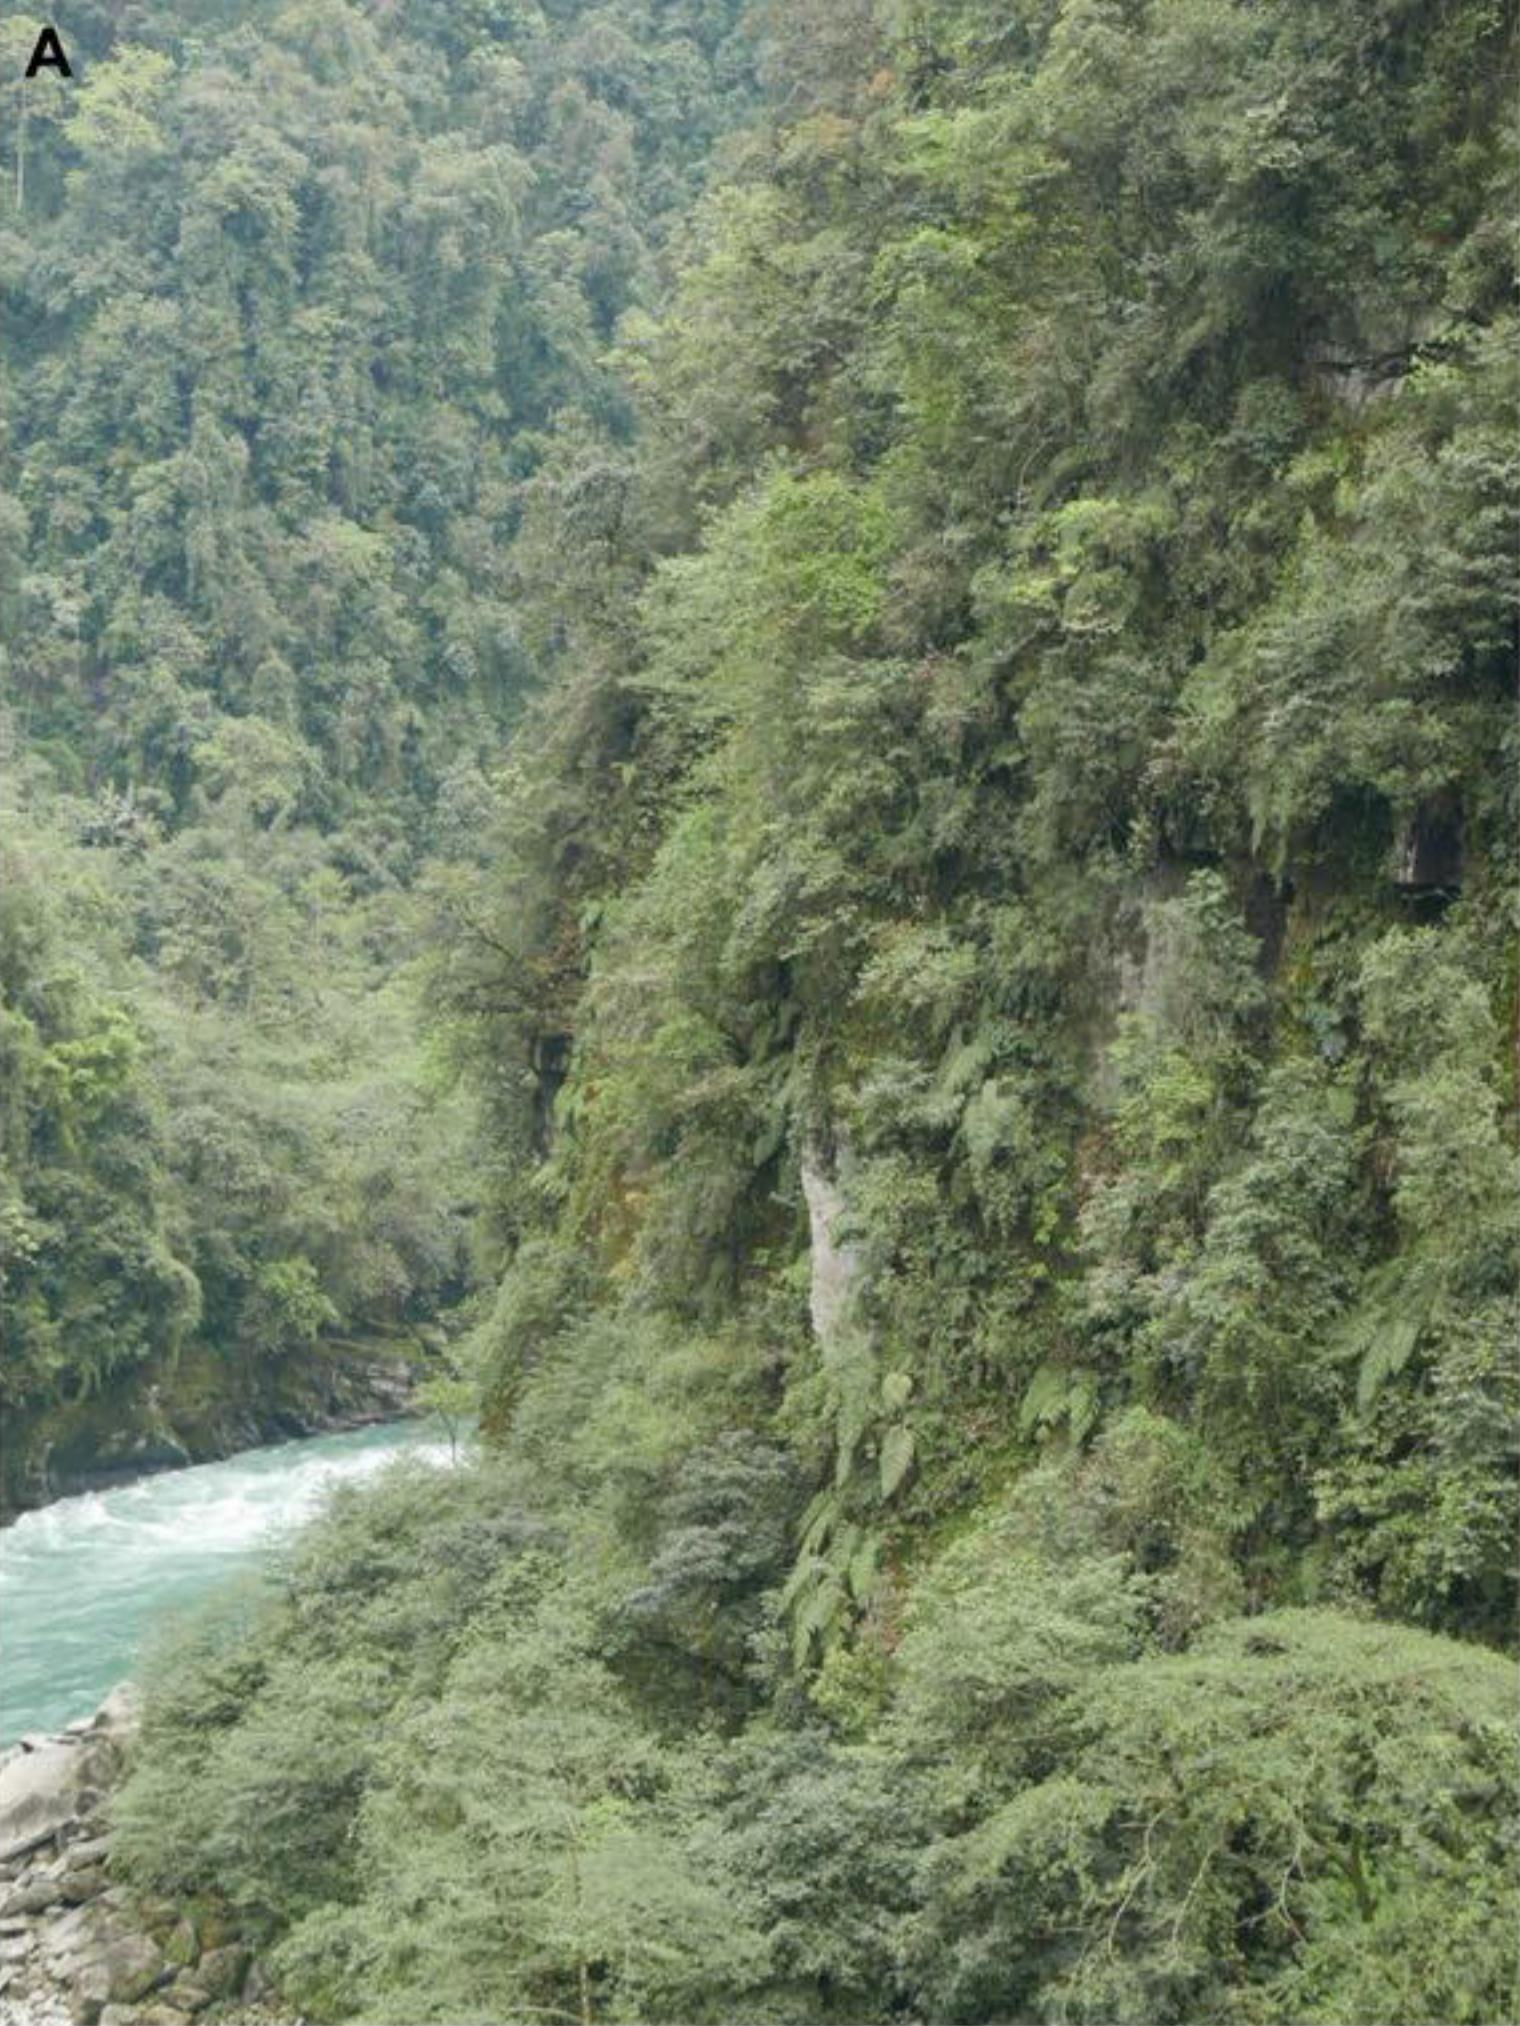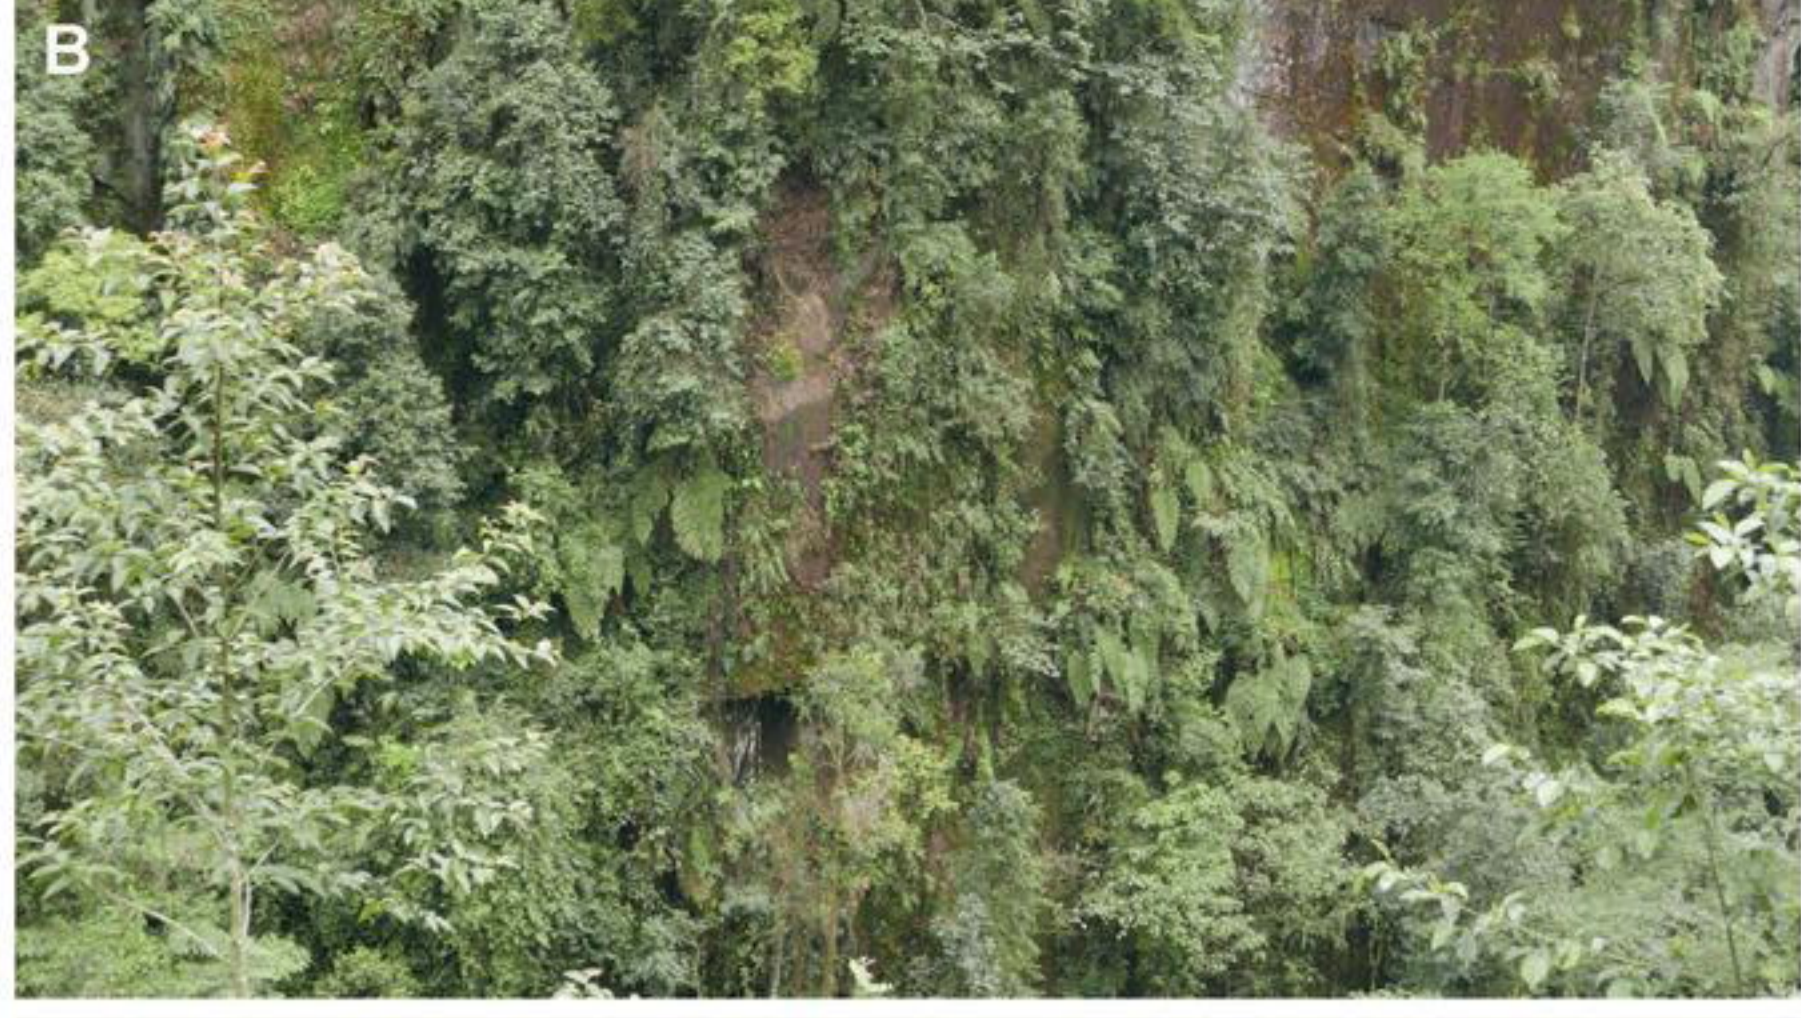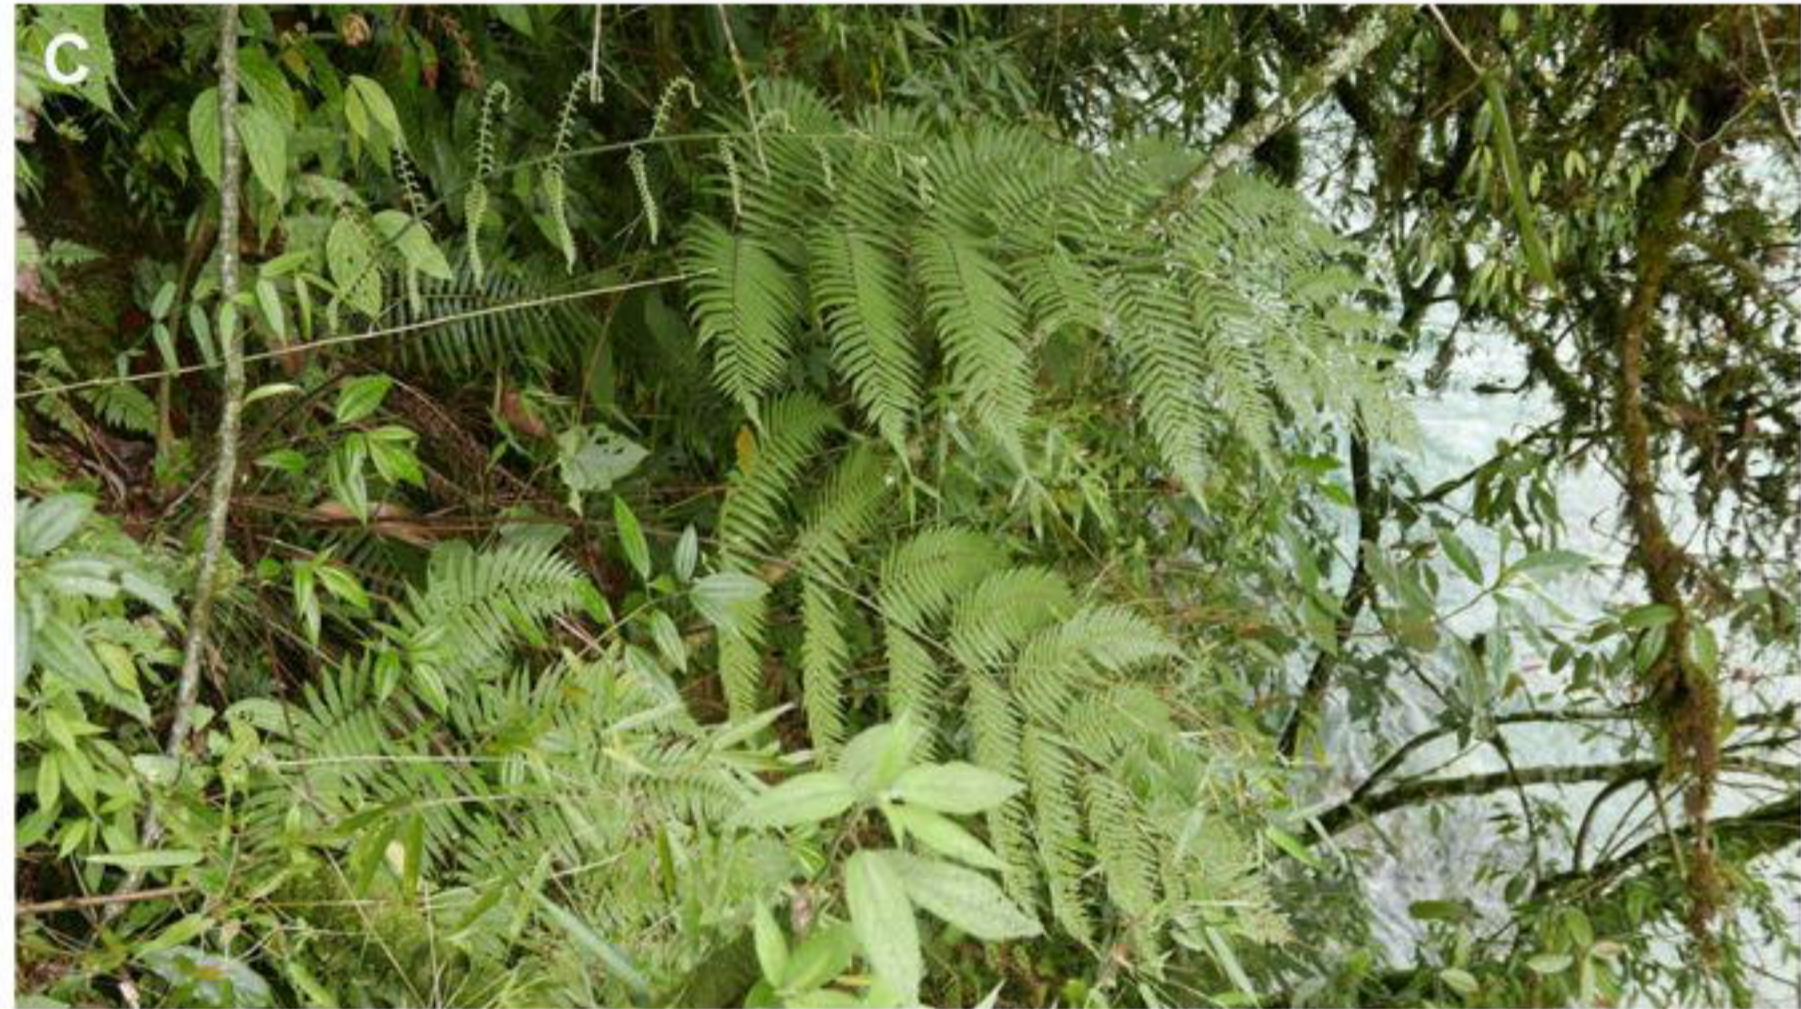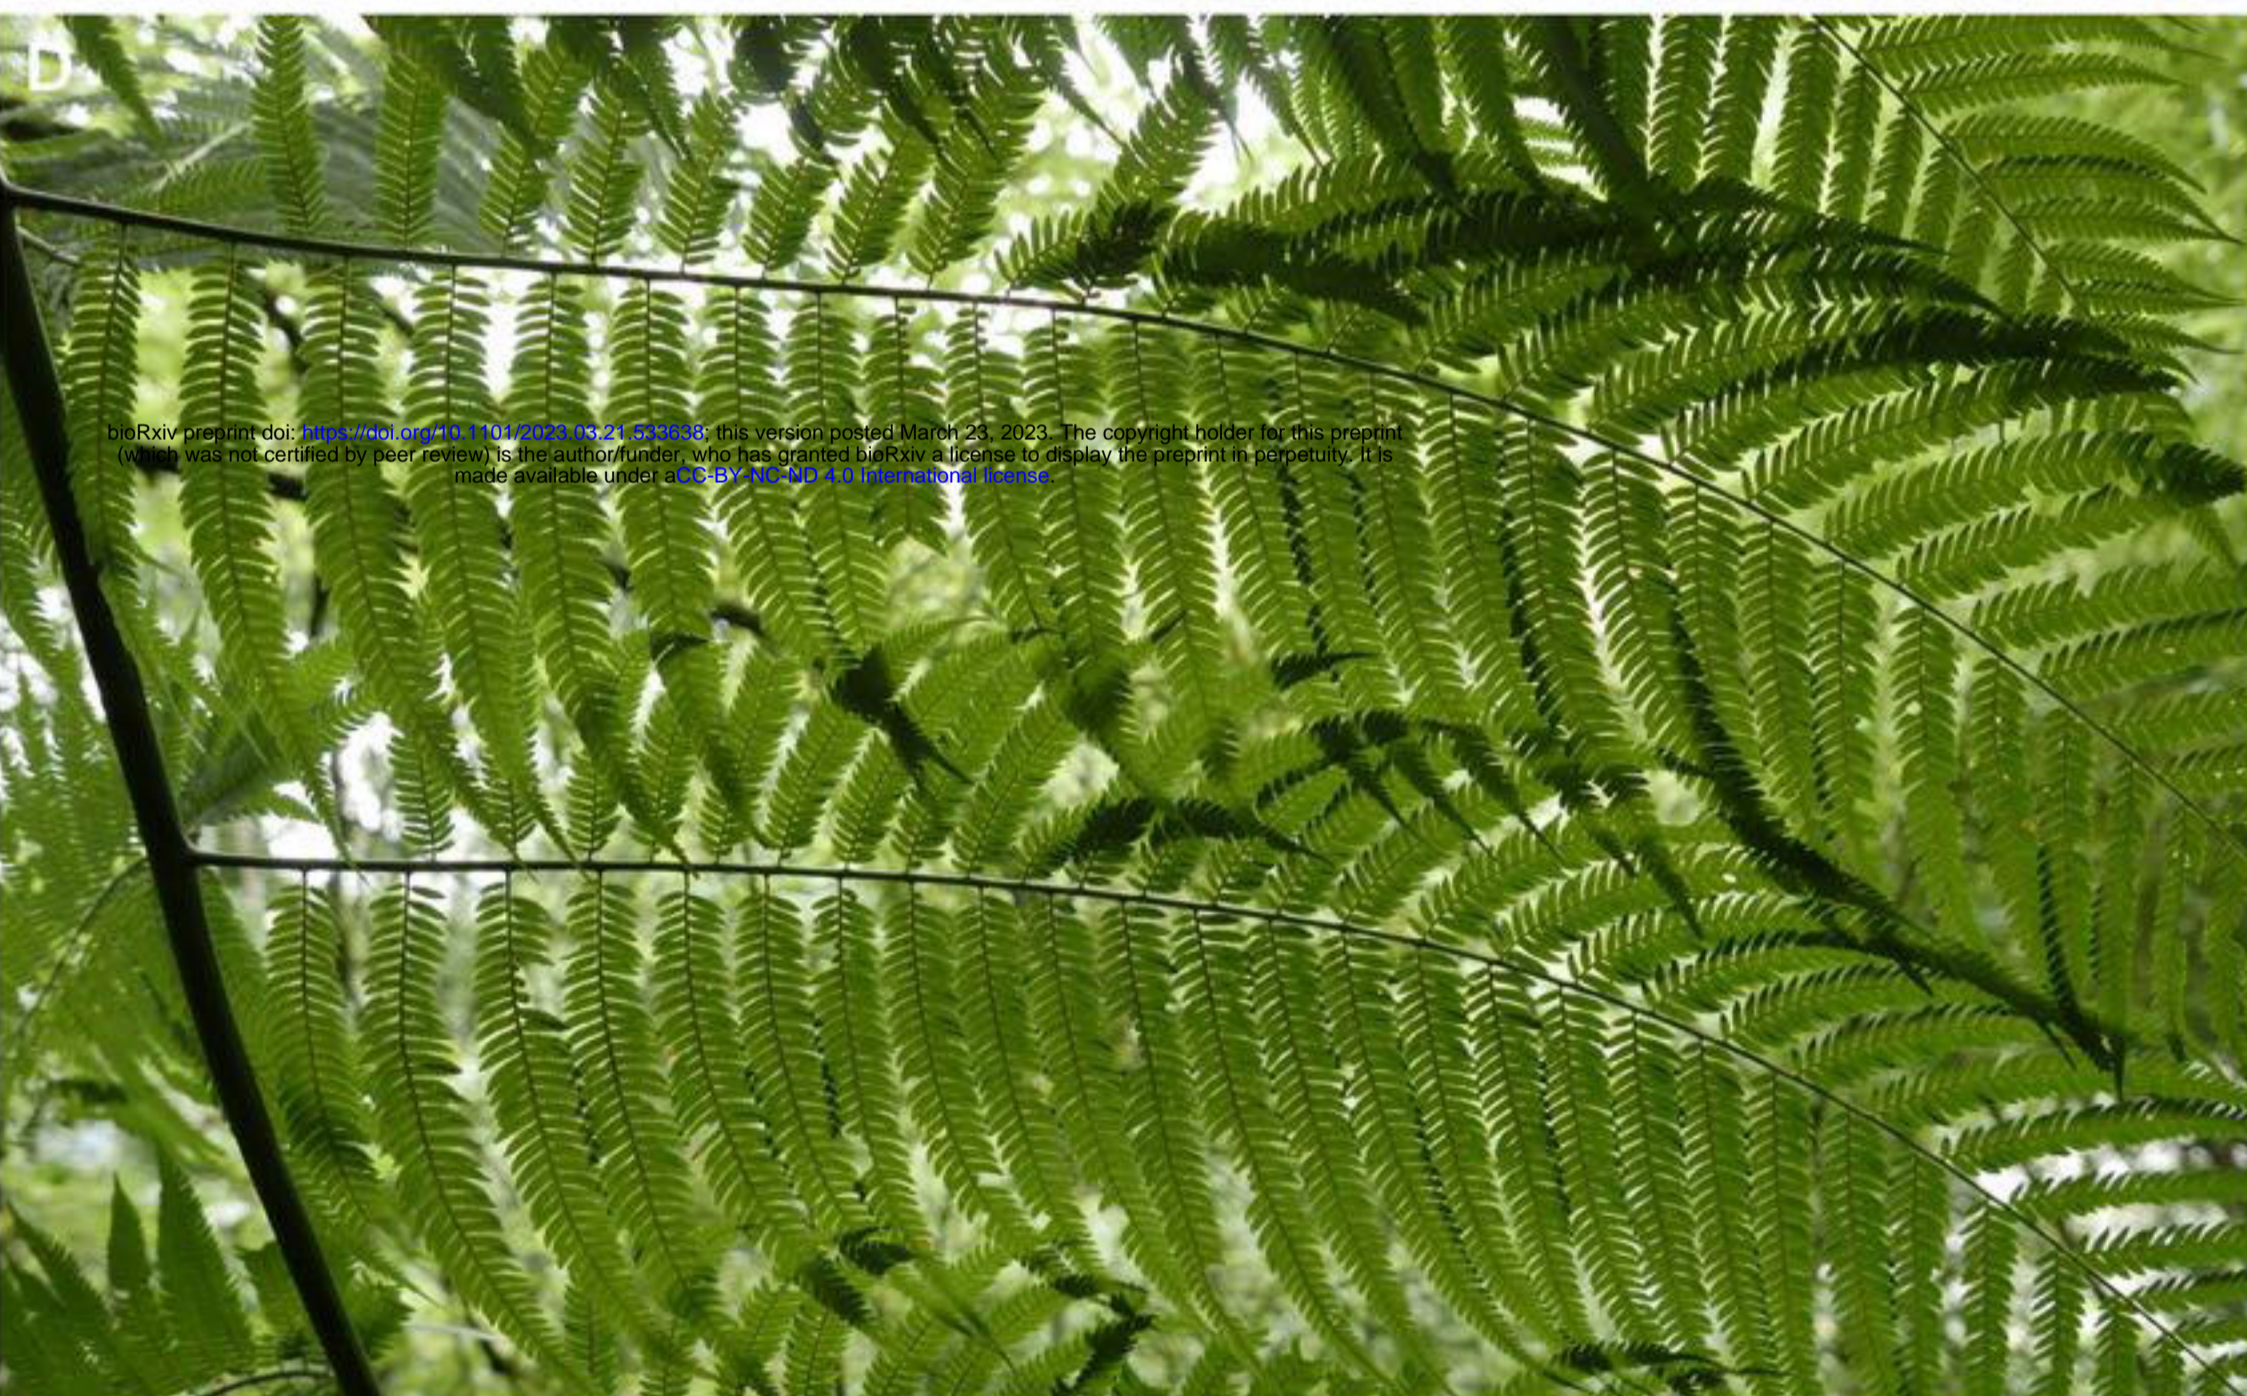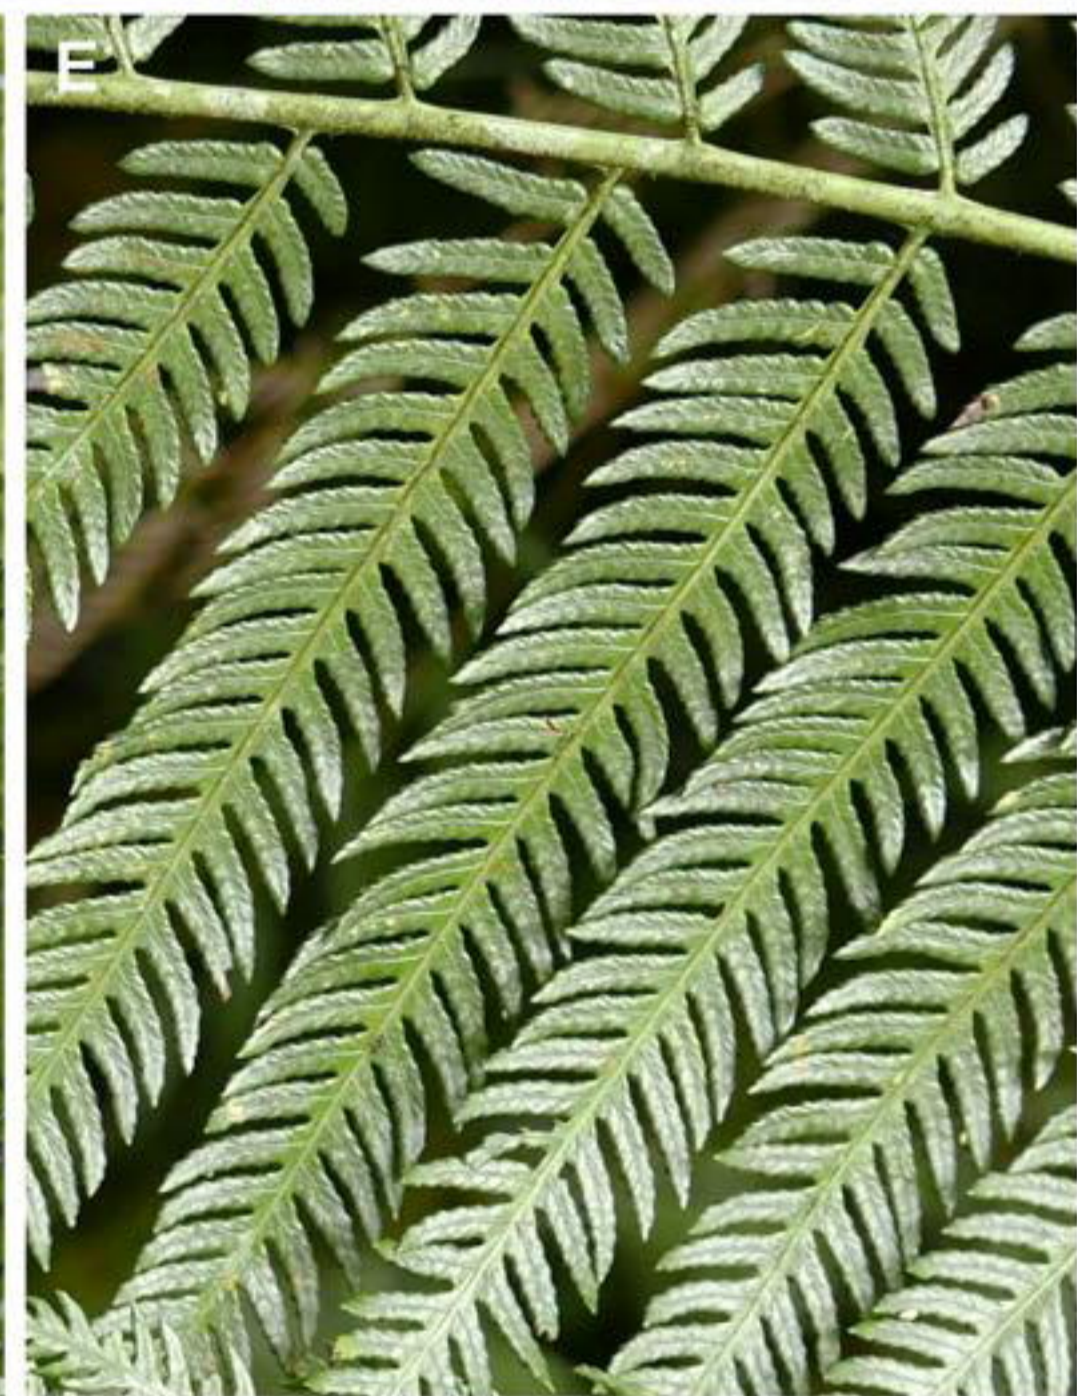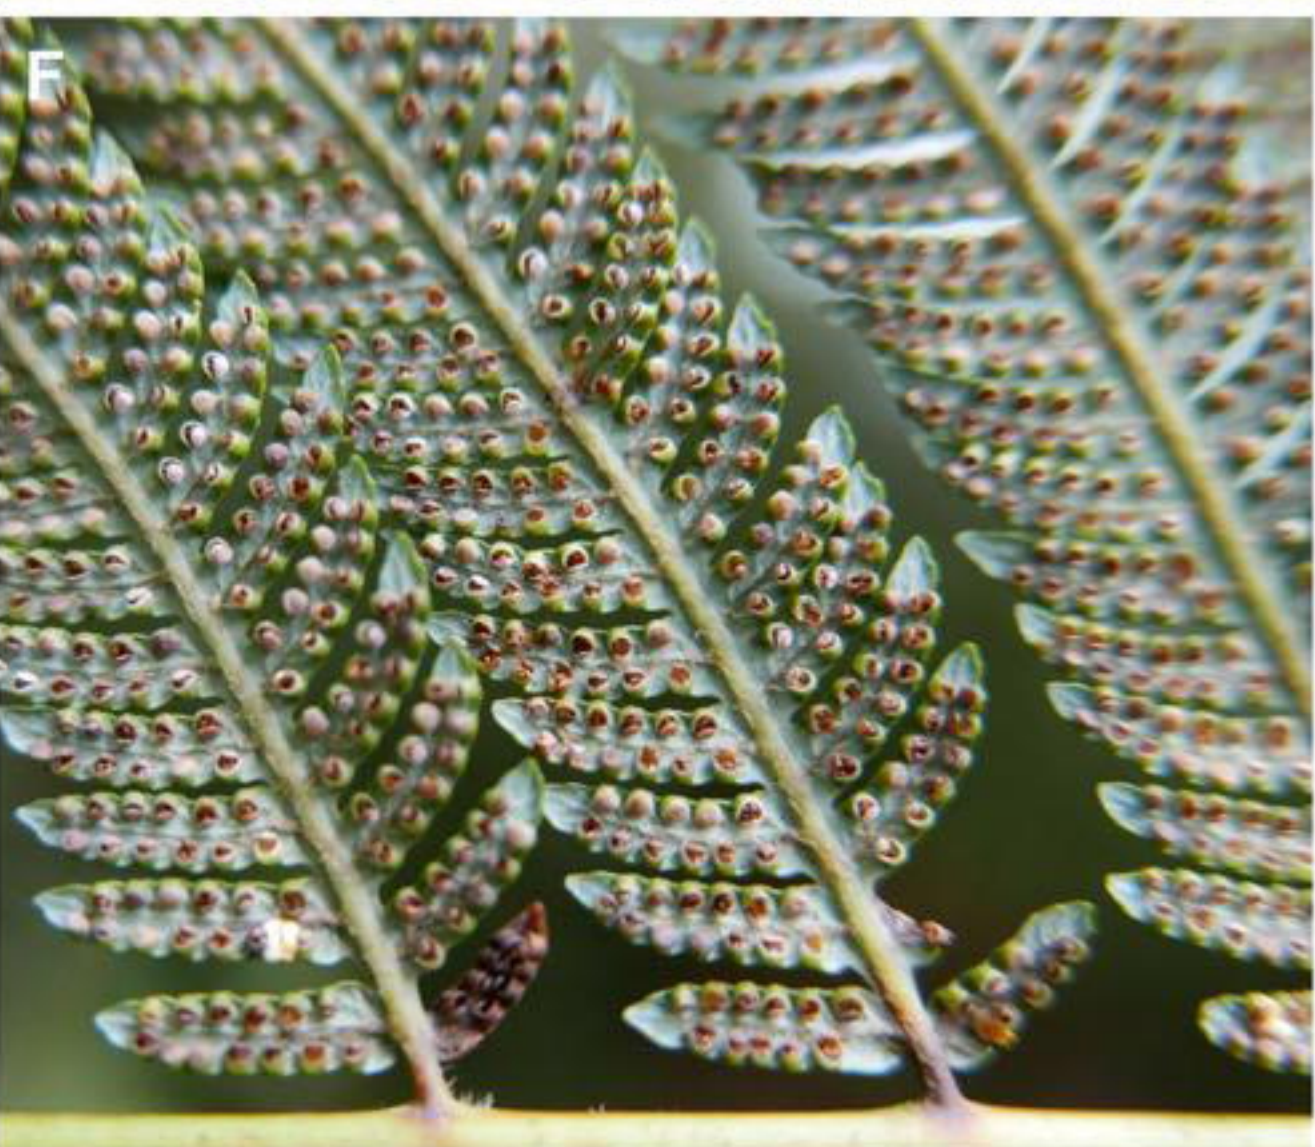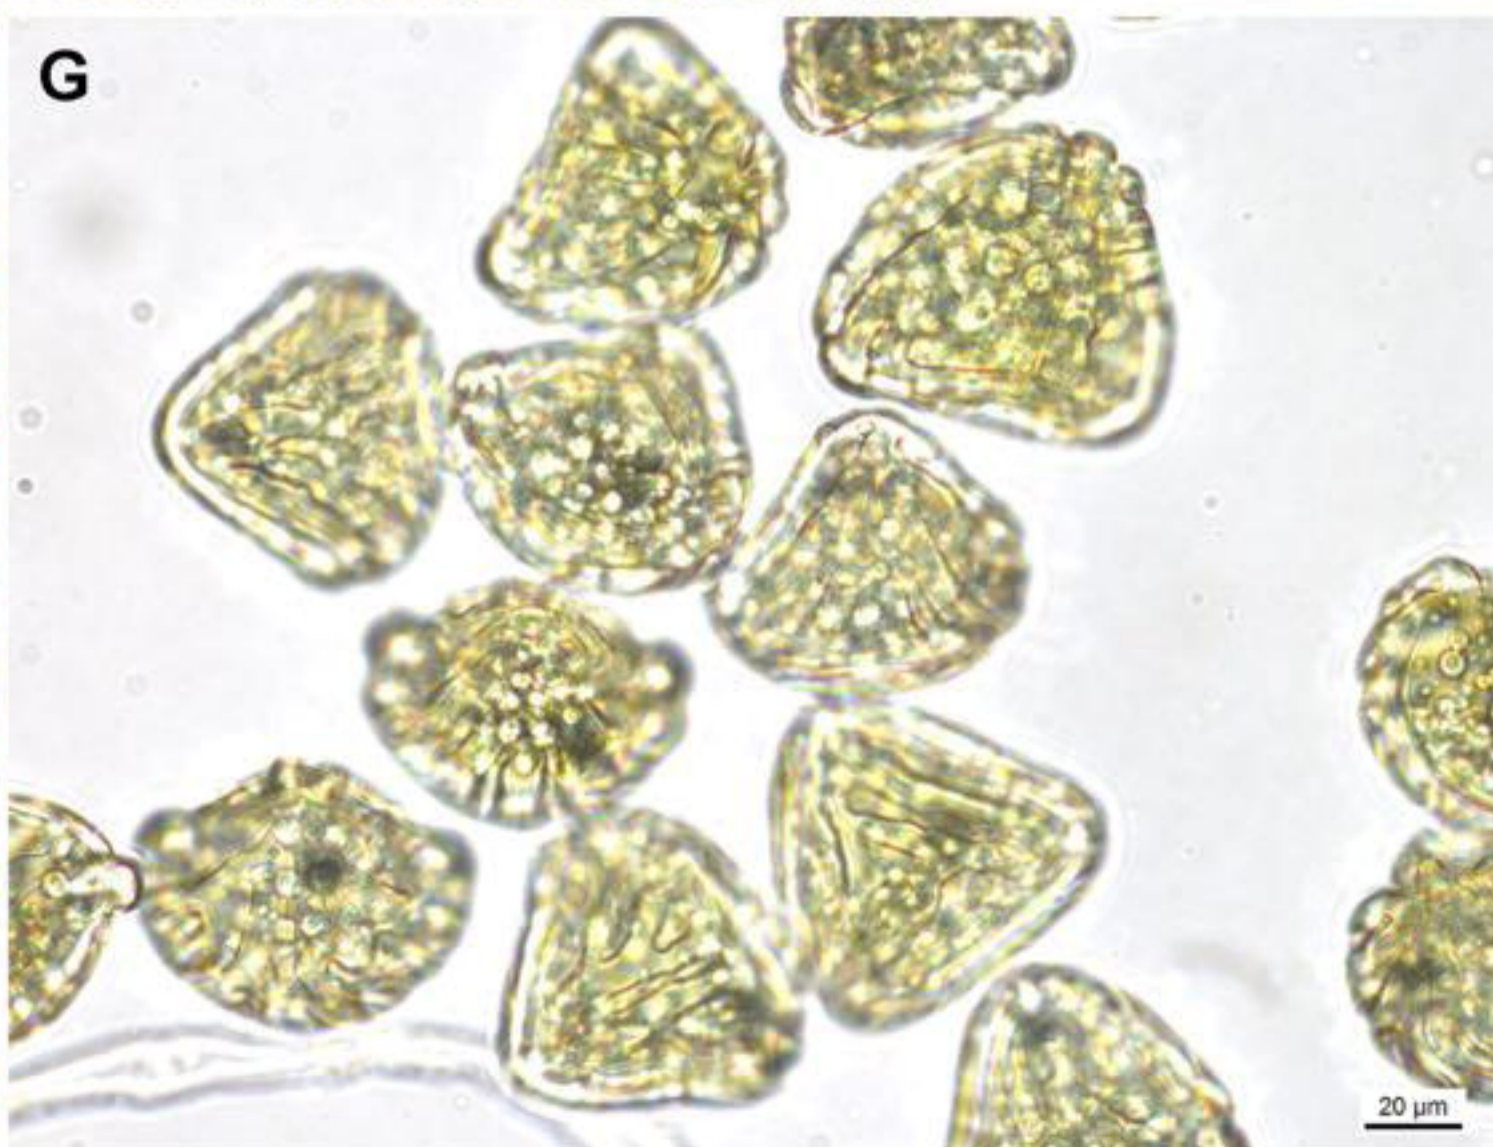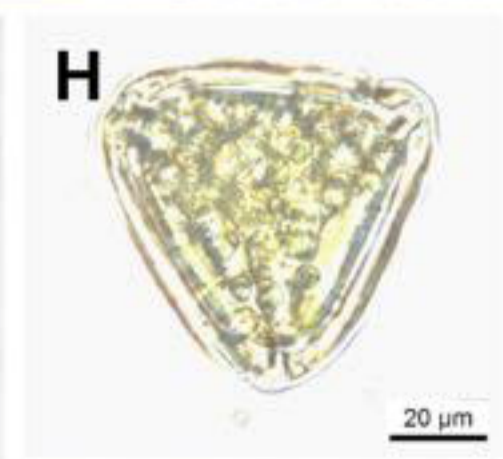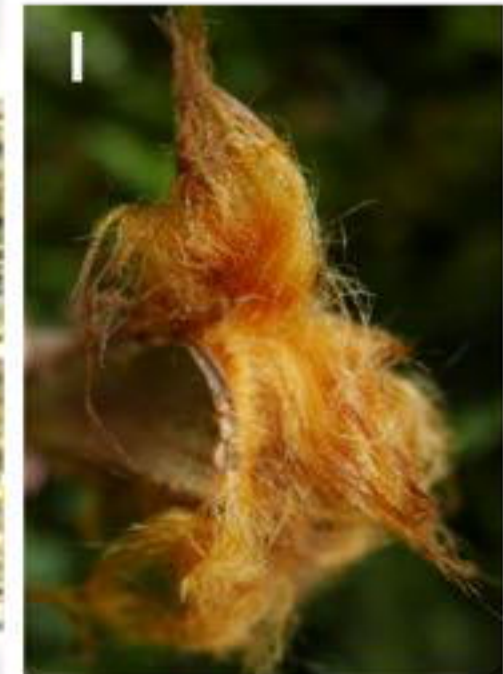

Source: https://www.biorxiv.org/content/10.1101/2023.03.21.533638v1.full.pdf
